# Supplementary material for: Macrocyclic versus open-chain carbazole receptors for carboxylate binding
Source: Royal Society of Chemistry journal article supplement (doi:10.1039/d1ob02398e), 2022-01-01
Supplement: d1ob02398e1.pdf [file d1ob02398e1.pdf]

## Supporting Information to

### Macrocyclic versus open-chain carbazole receptors for carboxylate binding

Somayyeh Kheirjou,\* Alo Rüttel, Astrid Darnell, Tõiv Haljasorg, Ivo Leito

#### Contents

|                                                                                                                                             |     |
|---------------------------------------------------------------------------------------------------------------------------------------------|-----|
| 1. Synthesis and characterization of compounds.....                                                                                         | S1  |
| 1.1 Instruments and methods .....                                                                                                           | S1  |
| 1.2 Synthesis.....                                                                                                                          | S1  |
| 1.3 Analytical spectra .....                                                                                                                | S3  |
| 1.3.1. <sup>1</sup> H NMR of CzU-NeP in DMSO-d <sub>6</sub> .....                                                                           | S3  |
| 1.3.2. <sup>13</sup> C NMR of CzU-NeP in DMSO-d <sub>6</sub> .....                                                                          | S4  |
| 1.3.3. HRMS spectrum of CzU-NeP .....                                                                                                       | S5  |
| 1.3.4. <sup>1</sup> H NMR of Cz-Gly-NeP in DMSO-d <sub>6</sub> .....                                                                        | S6  |
| 1.3.5. <sup>13</sup> C NMR of Cz-Gly-NeP in DMSO-d <sub>6</sub> .....                                                                       | S7  |
| 1.3.6. HRMS spectrum of Cz-Gly-NeP .....                                                                                                    | S8  |
| 1.3.7. <sup>1</sup> H NMR of CzU-Py in DMSO-d <sub>6</sub> .....                                                                            | S9  |
| 1.3.8. <sup>13</sup> C NMR of CzU-Py in DMSO-d <sub>6</sub> .....                                                                           | S10 |
| 1.3.9. HRMS spectrum of CzU-Py.....                                                                                                         | S11 |
| 1.3.10. <sup>1</sup> H NMR of CzU-DPM in DMSO-d <sub>6</sub> .....                                                                          | S12 |
| 1.3.11. <sup>13</sup> C NMR of CzU-DPM in DMSO-d <sub>6</sub> .....                                                                         | S13 |
| 1.3.12. HRMS spectrum of CzU-DPM.....                                                                                                       | S14 |
| 1.3.13. <sup>1</sup> H NMR of CzU-BA in DMSO-d <sub>6</sub> .....                                                                           | S15 |
| 1.3.14. <sup>13</sup> C NMR of CzU-BA in DMSO-d <sub>6</sub> .....                                                                          | S16 |
| 1.3.15. HRMS spectrum of CzU-BA .....                                                                                                       | S17 |
| 1.3.16. <sup>1</sup> H NMR of CzU-BB in DMSO-d <sub>6</sub> .....                                                                           | S18 |
| 1.3.17. <sup>13</sup> C NMR of CzU-BB in DMSO-d <sub>6</sub> .....                                                                          | S19 |
| 1.3.18. HRMS spectrum of CzU-BB .....                                                                                                       | S20 |
| 2. Relative binding affinity measurements .....                                                                                             | S21 |
| 2.1 <sup>1</sup> H NMR spectra (700.1 MHz) of a mixture of receptors CzU-NeP; 1,3-diindolylurea; 1,3-dicarbazolylurea + TBA-acetate.....    | S22 |
| 2.2 <sup>1</sup> H NMR spectra (700.1 MHz) of a mixture of receptors Cz-Gly-NeP; 1,3-diindolylurea; 1,3-dicarbazolylurea + TBA-acetate..... | S23 |
| 2.3 <sup>1</sup> H NMR spectra (700.1 MHz) of a mixture of receptors CzU-Py; 1,3-diindolylurea; 1,3-dicarbazolylurea + TBA-acetate.....     | S24 |

|      |                                                                                                                                          |     |
|------|------------------------------------------------------------------------------------------------------------------------------------------|-----|
| 2.4  | <sup>1</sup> H NMR spectra (700.1 MHz) of a mixture of receptors CzU-DPM; 1,3-diindolylurea; 1,3-dicarbazolylurea + TBA-acetate.....     | S25 |
| 2.5  | <sup>1</sup> H NMR spectra (700.1 MHz) of a mixture of receptors CzU-BA; 1,3-diindolylurea; 1,3-dicarbazolylurea + TBA-acetate.....      | S26 |
| 2.6  | <sup>1</sup> H NMR spectra (700.1 MHz) of a mixture of receptors CzU-BB; 1,3-diindolylurea; 1,3-dicarbazolylurea + TBA-acetate.....      | S27 |
| 2.7  | <sup>1</sup> H NMR spectra (700.1 MHz) of a mixture of receptors CzU-NeP; 1,3-diindolylurea; 1,3-dicarbazolylurea + TBA-benzoate.....    | S28 |
| 2.8  | <sup>1</sup> H NMR spectra (700.1 MHz) of a mixture of receptors Cz-Gly-NeP; 1,3-diindolylurea; 1,3-dicarbazolylurea + TBA-benzoate..... | S29 |
| 2.9  | <sup>1</sup> H NMR spectra (700.1 MHz) of a mixture of receptors CzU-Py; 1,3-diindolylurea; 1,3-dicarbazolylurea + TBA-benzoate.....     | S30 |
| 2.10 | <sup>1</sup> H NMR spectra (700.1 MHz) of a mixture of receptors CzU-DPM; 1,3-diindolylurea; 1,3-dicarbazolylurea + TBA-benzoate.....    | S31 |
| 2.11 | <sup>1</sup> H NMR spectra (700.1 MHz) of a mixture of receptors CzU-BA; 1,3-diindolylurea; 1,3-dicarbazolylurea + TBA-benzoate.....     | S32 |
| 2.12 | <sup>1</sup> H NMR spectra (700.1 MHz) of a mixture of receptors CzU-BB; 1,3-diindolylurea; 1,3-dicarbazolylurea + TBA-benzoate.....     | S33 |
| 2.13 | <sup>1</sup> H NMR spectra (700.1 MHz) of a mixture of receptors CzU-NeP; 1,3-diindolylurea; 1,3-dicarbazolylurea + TBA-formate.....     | S34 |
| 2.14 | <sup>1</sup> H NMR spectra (700.1 MHz) of a mixture of receptors Cz-Gly-NeP; 1,3-diindolylurea; 1,3-dicarbazolylurea + TBA-formate.....  | S35 |
| 2.15 | <sup>1</sup> H NMR spectra (700.1 MHz) of a mixture of receptors CzU-Py; 1,3-diindolylurea; 1,3-dicarbazolylurea + TBA-formate.....      | S36 |
| 2.16 | <sup>1</sup> H NMR spectra (700.1 MHz) of a mixture of receptors CzU-DPM; 1,3-diindolylurea; 1,3-dicarbazolylurea + TBA-formate.....     | S37 |
| 2.17 | <sup>1</sup> H NMR spectra (700.1 MHz) of a mixture of receptors CzU-BA; 1,3-diindolylurea; 1,3-dicarbazolylurea + TBA-formate.....      | S38 |
| 2.18 | <sup>1</sup> H NMR spectra (700.1 MHz) of a mixture of receptors CzU-BB; 1,3-diindolylurea; 1,3-dicarbazolylurea + TBA-formate.....      | S39 |
| 2.19 | <sup>1</sup> H NMR spectra (700.1 MHz) of a mixture of receptors CzU-NeP; 1,3-diindolylurea; 1,3-dicarbazolylurea + TBA-lactate.....     | S40 |
| 2.20 | <sup>1</sup> H NMR spectra (700.1 MHz) of a mixture of receptors Cz-Gly-NeP; 1,3-diindolylurea; 1,3-dicarbazolylurea + TBA-lactate.....  | S41 |
| 2.21 | <sup>1</sup> H NMR spectra (700.1 MHz) of a mixture of receptors CzU-Py; 1,3-diindolylurea; 1,3-dicarbazolylurea + TBA-lactate.....      | S42 |
| 2.22 | <sup>1</sup> H NMR spectra (700.1 MHz) of a mixture of receptors CzU-DPM; 1,3-diindolylurea; 1,3-dicarbazolylurea + TBA-lactate.....     | S43 |
| 2.23 | <sup>1</sup> H NMR spectra (700.1 MHz) of a mixture of receptors CzU-BA; 1,3-diindolylurea; 1,3-dicarbazolylurea + TBA-lactate.....      | S44 |

|        |                                                                                                                                                                       |     |
|--------|-----------------------------------------------------------------------------------------------------------------------------------------------------------------------|-----|
| 2.24   | <sup>1</sup> H NMR spectra (700.1 MHz) of a mixture of receptors CzU-BB; 1,3-diindolylurea; 1,3-dicarbazolylurea + TBA-lactate.....                                   | S45 |
| 2.25   | <sup>1</sup> H NMR spectra (700.1 MHz) of a mixture of receptors CzU-NeP; 1,3-diindolylurea; 1,3-dicarbazolylurea + TBA-sorbate .....                                 | S46 |
| 2.26   | <sup>1</sup> H NMR spectra (700.1 MHz) of a mixture of receptors Cz-Gly-NeP; 1,3-diindolylurea; 1,3-dicarbazolylurea + TBA-sorbate .....                              | S47 |
| 2.27   | <sup>1</sup> H NMR spectra (700.1 MHz) of a mixture of receptors CzU-Py; 1,3-diindolylurea; 1,3-dicarbazolylurea + TBA-sorbate .....                                  | S48 |
| 2.28   | <sup>1</sup> H NMR spectra (700.1 MHz) of a mixture of receptors CzU-DPM; 1,3-diindolylurea; 1,3-dicarbazolylurea + TBA-sorbate .....                                 | S49 |
| 2.29   | <sup>1</sup> H NMR spectra (700.1 MHz) of a mixture of receptors CzU-BA; 1,3-diindolylurea; 1,3-dicarbazolylurea + TBA-sorbate .....                                  | S50 |
| 2.30   | <sup>1</sup> H NMR spectra (700.1 MHz) of a mixture of receptors CzU-BB; 1,3-diindolylurea; 1,3-dicarbazolylurea + TBA-sorbate .....                                  | S51 |
| 3.     | Computational investigation of binding .....                                                                                                                          | S52 |
| 3.1    | Used computational parameters .....                                                                                                                                   | S52 |
| 3.2    | Images of the geometries of most stable conformers (determined using COSMO-RS, solvent: 99.5% DMSO with 0.5% water). COSMOTerm 2021, parametrization BP_TZVP_21. .... | S52 |
| 3.2.1  | Lowest energy conformation of receptor CzU-NeP .....                                                                                                                  | S52 |
| 3.2.2  | Lowest energy conformation of receptor CzU-NeP with acetate anion.....                                                                                                | S53 |
| 3.2.3  | Lowest energy conformation of receptor CzU-NeP with benzoate anion.....                                                                                               | S53 |
| 3.2.4  | Lowest energy conformation of receptor CzU-NeP with formate anion.....                                                                                                | S54 |
| 3.2.5  | Lowest energy conformation of receptor CzU-NeP with lactate anion.....                                                                                                | S54 |
| 3.2.6  | Lowest energy conformation of receptor CzU-NeP with sorbate anion .....                                                                                               | S55 |
| 3.2.7  | Lowest energy conformation of receptor Cz-Gly-NeP.....                                                                                                                | S55 |
| 3.2.8  | Lowest energy conformation of receptor Cz-Gly-NeP with acetate anion.....                                                                                             | S56 |
| 3.2.9  | Lowest energy conformation of receptor Cz-Gly-NeP with benzoate anion .....                                                                                           | S56 |
| 3.2.10 | Lowest energy conformation of receptor Cz-Gly-NeP with formate anion.....                                                                                             | S57 |
| 3.2.11 | Lowest energy conformation of receptor Cz-Gly-NeP with lactate anion .....                                                                                            | S57 |
| 3.2.12 | Lowest energy conformation of receptor Cz-Gly-NeP with sorbate anion.....                                                                                             | S58 |
| 3.2.13 | Lowest energy conformation of receptor CzU-Py .....                                                                                                                   | S58 |
| 3.2.14 | Lowest energy conformation of receptor CzU-Py with acetate anion .....                                                                                                | S59 |
| 3.2.15 | Lowest energy conformation of receptor CzU-Py with benzoate anion .....                                                                                               | S59 |
| 3.2.16 | Lowest energy conformation of receptor CzU-Py with formate anion .....                                                                                                | S60 |
| 3.2.17 | Lowest energy conformation of receptor CzU-Py with lactate anion .....                                                                                                | S60 |
| 3.2.18 | Lowest energy conformation of receptor CzU-Py with sorbate anion.....                                                                                                 | S61 |
| 3.2.19 | Lowest energy conformation of receptor CzU-DPM .....                                                                                                                  | S61 |
| 3.2.20 | Lowest energy conformation of receptor CzU-DPM with acetate anion .....                                                                                               | S62 |

|        |                                                                          |      |
|--------|--------------------------------------------------------------------------|------|
| 3.2.21 | Lowest energy conformation of receptor CzU-DPM with benzoate anion ..... | S62  |
| 3.2.22 | Lowest energy conformation of receptor CzU-DPM with formate anion .....  | S63  |
| 3.2.23 | Lowest energy conformation of receptor CzU-DPM with lactate anion .....  | S63  |
| 3.2.24 | Lowest energy conformation of receptor CzU-DPM with sorbate anion .....  | S64  |
| 3.2.25 | Lowest energy conformation of receptor CzU-BA .....                      | S64  |
| 3.2.26 | Lowest energy conformation of receptor CzU-BA with acetate anion.....    | S65  |
| 3.2.27 | Lowest energy conformation of receptor CzU-BA with benzoate anion.....   | S65  |
| 3.2.28 | Lowest energy conformation of receptor CzU-BA with formate anion.....    | S66  |
| 3.2.29 | Lowest energy conformation of receptor CzU-BA with lactate anion.....    | S66  |
| 3.2.30 | Lowest energy conformation of receptor CzU-BA with sorbate anion .....   | S67  |
| 3.2.31 | Lowest energy conformation of receptor CzU-BB.....                       | S67  |
| 3.2.32 | Lowest energy conformation of receptor CzU-BB with acetate anion.....    | S68  |
| 3.2.33 | Lowest energy conformation of receptor CzU-BB with benzoate anion .....  | S68  |
| 3.2.34 | Lowest energy conformation of receptor CzU-BB with formate anion.....    | S69  |
| 3.2.35 | Lowest energy conformation of receptor CzU-BB with lactate anion.....    | S69  |
| 3.2.36 | Lowest energy conformation of receptor CzU-BB with sorbate anion.....    | S70  |
| 3.3    | Coordinates of most stable conformer geometries.....                     | S71  |
| 3.3.1  | CzU-NeP free receptor.....                                               | S71  |
| 3.3.2  | CzU-NeP acetate complex.....                                             | S75  |
| 3.3.3  | CzU-NeP benzoate complex.....                                            | S80  |
| 3.3.4  | CzU-NeP lactate complex.....                                             | S85  |
| 3.3.5  | CzU-NeP formate complex.....                                             | S89  |
| 3.3.6  | CzU-NeP sorbate complex .....                                            | S94  |
| 3.3.7  | Cz-Gly-NeP free receptor .....                                           | S99  |
| 3.3.8  | Cz-Gly-NeP acetate complex .....                                         | S104 |
| 3.3.9  | Cz-Gly-NeP benzoate complex .....                                        | S109 |
| 3.3.10 | Cz-Gly-NeP lactate complex.....                                          | S114 |
| 3.3.11 | Cz-Gly-NeP formate complex.....                                          | S119 |
| 3.3.12 | Cz-Gly-NeP sorbate complex.....                                          | S124 |
| 3.3.13 | CzU-Py free receptor .....                                               | S129 |
| 3.3.14 | CzU-Py acetate complex .....                                             | S133 |
| 3.3.15 | CzU-Py benzoate complex .....                                            | S137 |
| 3.3.16 | CzU-Py lactate complex .....                                             | S141 |
| 3.3.17 | CzU-Py formate complex .....                                             | S146 |
| 3.3.18 | CzU-Py sorbate complex .....                                             | S150 |
| 3.3.19 | CzU-DPM free receptor .....                                              | S154 |

|        |                               |      |
|--------|-------------------------------|------|
| 3.3.20 | CzU-DPM acetate complex ..... | S158 |
| 3.3.21 | CzU-DPM benzoate complex..... | S163 |
| 3.3.22 | CzU-DPM lactate complex ..... | S167 |
| 3.3.23 | CzU-DPM formate complex ..... | S172 |
| 3.3.24 | CzU-DPM sorbate complex ..... | S176 |
| 3.3.25 | CzU-BA free receptor.....     | S181 |
| 3.3.26 | CzU-BA acetate complex.....   | S186 |
| 3.3.27 | CzU-BA benzoate complex.....  | S191 |
| 3.3.28 | CzU-BA lactate complex.....   | S196 |
| 3.3.29 | CzU-BA formate complex.....   | S201 |
| 3.3.30 | CzU-BA sorbate complex .....  | S206 |
| 3.3.31 | CzU-BB free receptor .....    | S212 |
| 3.3.32 | CzU-BB acetate complex.....   | S216 |
| 3.3.33 | CzU-BB benzoate complex.....  | S222 |
| 3.3.34 | CzU-BB lactate complex.....   | S227 |
| 3.3.35 | CzU-BB formate complex.....   | S232 |
| 3.3.36 | CzU-BB sorbate complex.....   | S237 |
| 4.     | References.....               | S243 |

## 1. Synthesis and characterization of compounds

### 1.1 Instruments and methods

NMR measurements, characterization and assessment of purity of all synthesis products were carried out on a Bruker Avance-III 700 MHz NMR spectrometer. All spectra were recorded using TopSpin 3.2 software and the chemical shifts calibrated against the residual solvent signal. Chemical shifts were reported in parts per million (ppm) and coupling constants  $J$  were given in hertz (Hz). Data was reported as follows: chemical shift, multiplicity (s-singlet, bs – broad singlet, d – doublet, dd – doublet of doublets), coupling constant and integration. The residual signal of DMSO- $d_6$  solvent was used as an internal reference standard ( $\delta_H = 2.500$  ppm and  $\delta_C = 39.50$  ppm).

High-resolution mass spectrometric analyses of the substances were done using ESI ionization. For ESI-measurements a hybrid mass spectrometer Varian J-320 triple quadrupole instrument coupled with Varian 910 FT-ICR instrument with 7 T magnet were used. The ions from the ion source are first directed through the quadrupole system (which can also be used for low-resolution MS analysis) into the FT-ICR mass spectrometer for high resolution mass spectral analysis. For ionization, a modified nano-ESI source was used with the following parameters: spray chamber temperature, 40 °C; API-drying gas ( $N_2$ ), 10 psi at 150 °C; ESI needle voltage 1800-2500 V, shield voltage, 300 V; and capillary voltage, 40 V. Solvents used for different receptors were MeOH, and 50% MeOH/50% DCM with 0.1% HCOOH with an analyte concentration of approximately 0.5-1 mg/ml. Sample infusion rate was generally 5 ml/min. For calibration of the  $m/z$  axis, samples were spiked with an in-house internal calibration solution, which contained ions with the following exact  $m/z$  values:  $C_{16}H_{36}N^+$  ( $m/z = 242.28423$ );  $C_{19}H_{29}N_4PF_3^+$  ( $m/z = 401.20765$ );  $C_{26}H_{45}N_7P_2Cl^+$  ( $m/z = 552.28947$ );  $C_{26}H_{64}N_{13}P_4^+$  ( $m/z = 682.43526$ );  $C_{42}H_{78}N_{13}P_4^+$  ( $m/z = 888.54481$ ); and  $C_{44}H_{82}N_{13}P_4^+$  ( $m/z = 916.57611$ ). The concentration of the calibrants in the infused solutions remained within 0.5–1.0  $\mu$ M.

COSMO-RS calculations were done using COSMOTermX19 parametrization BP\_TZVP\_C19 (solvent: DMSO with 0.5% water).

### 1.2 Synthesis

Unless stated otherwise, reagents were obtained from commercial sources and used without purification. DMSO- $d_6$  for NMR was obtained from Deutero with at least 99.8% purity. Dry solvents were prepared at least 72 h before use in round-bottomed flasks supplied with 3 Å molecular sieves under an argon atmosphere. Water used in this work was obtained from a MilliQ Advantage A10 system or from an ELGA PURELAB® Ultra system.

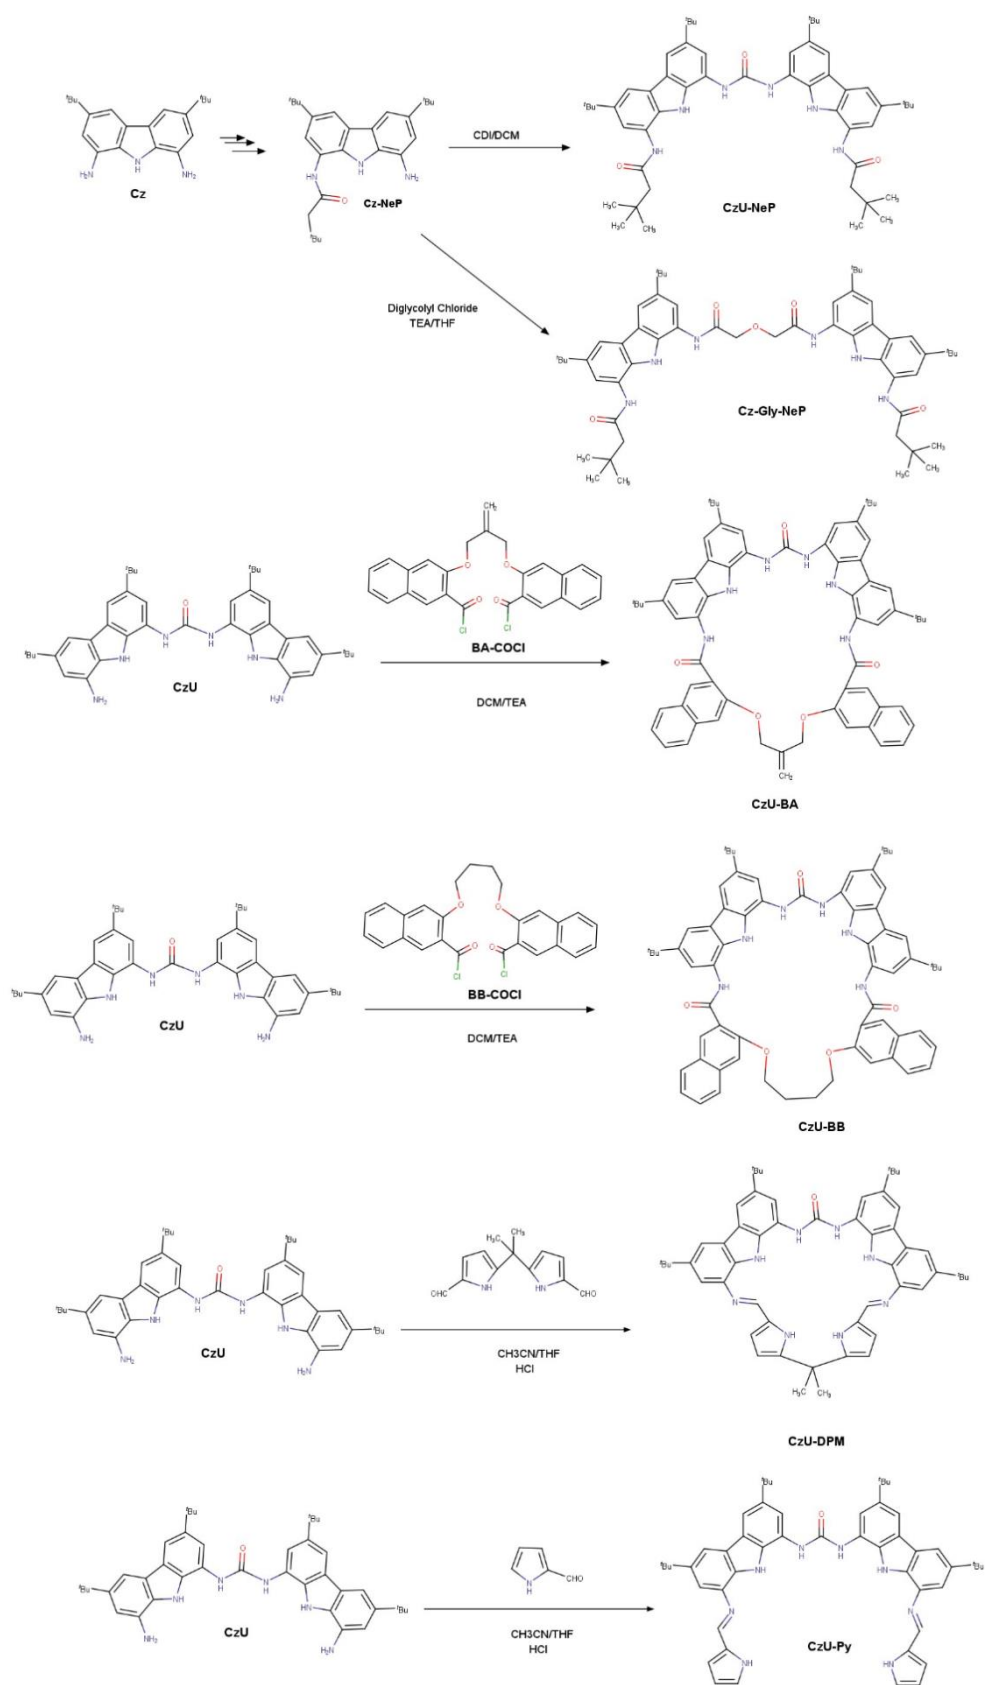

**Scheme 1** Synthesis procedure

Compounds **Cz** and **Cz-NeP** were prepared as described in references.<sup>1-3</sup>

### 1.3 Analytical spectra

#### 1.3.1. $^1\text{H}$ NMR of CzU-NeP in $\text{DMSO-d}_6$

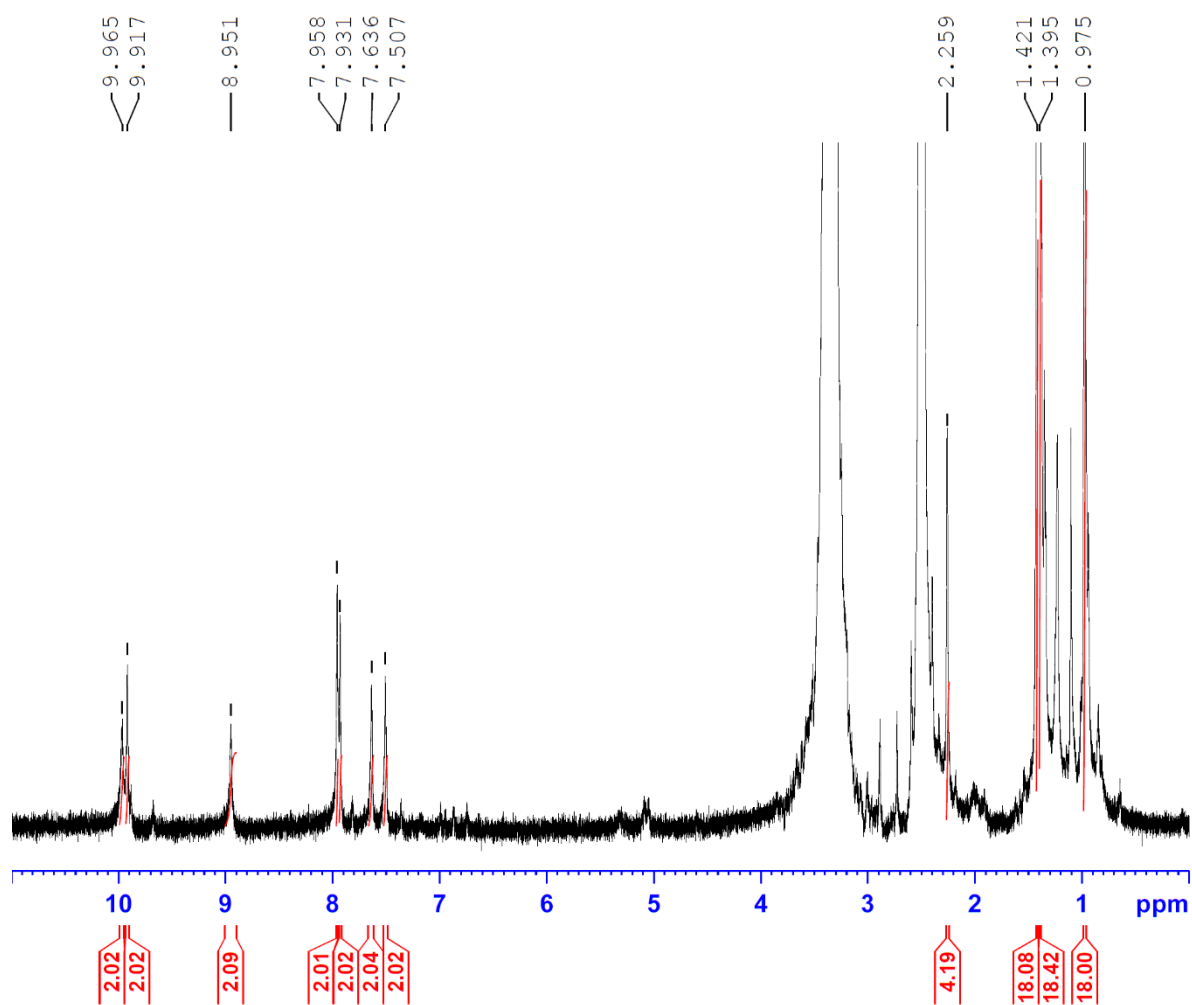



1.3.2.  $^{13}\text{C}$  NMR of CzU-NeP in  $\text{DMSO-d}_6$

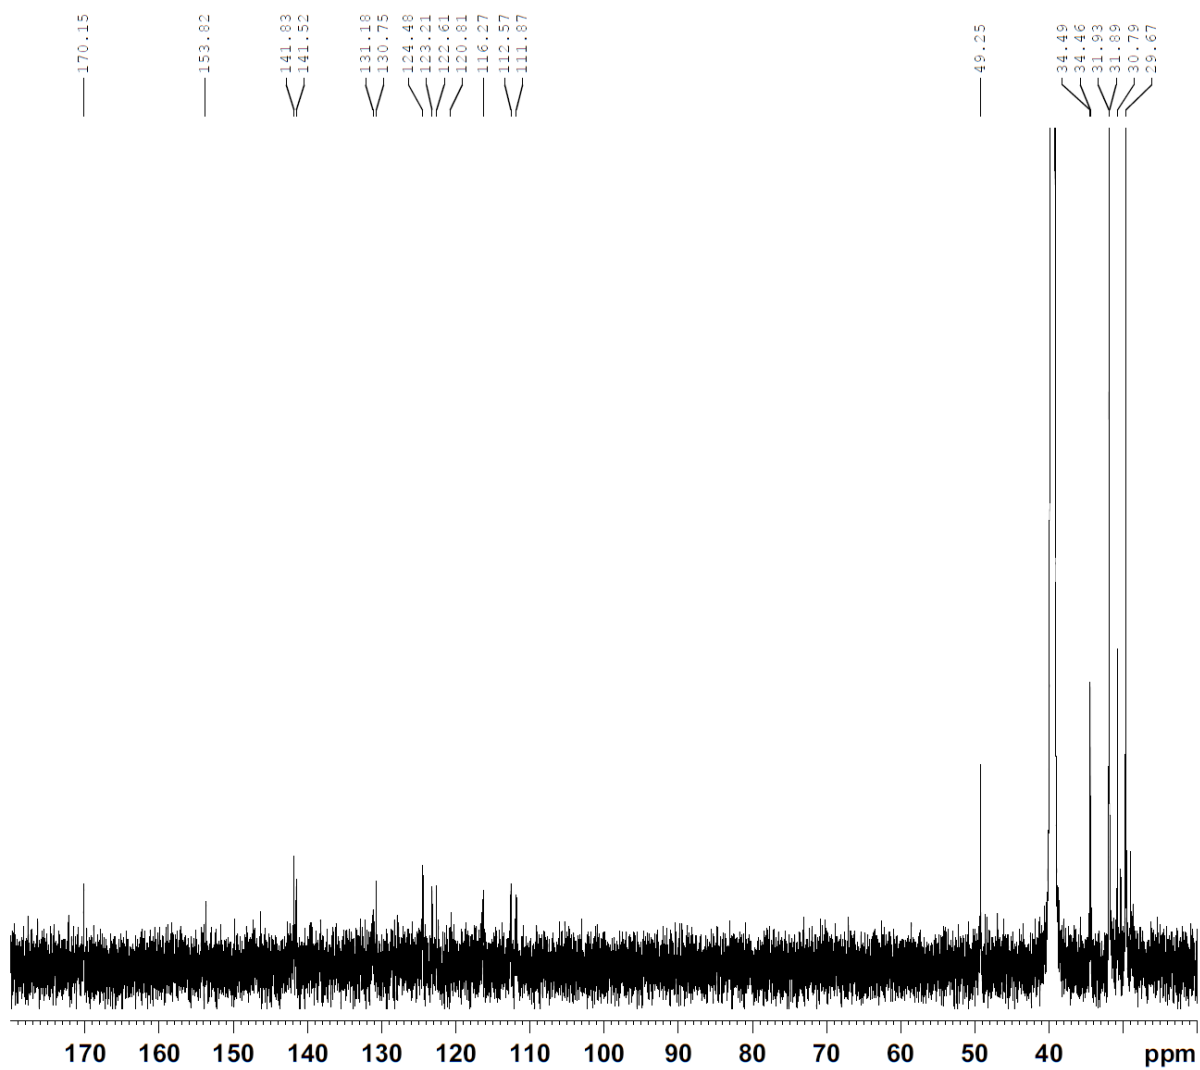

### 1.3.3. HRMS spectrum of CzU-NeP

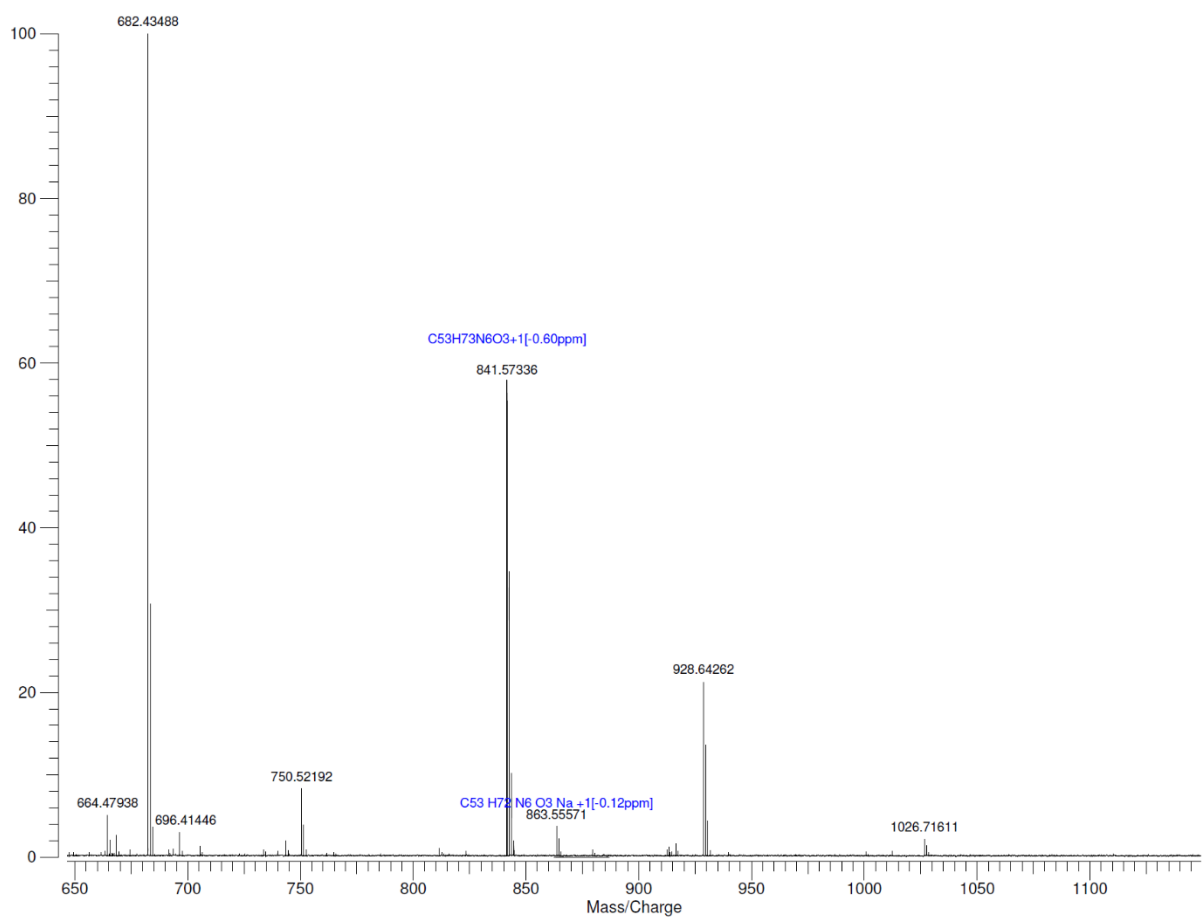

1.3.4.  $^1\text{H}$  NMR of Cz-Gly-NeP in  $\text{DMSO-d}_6$

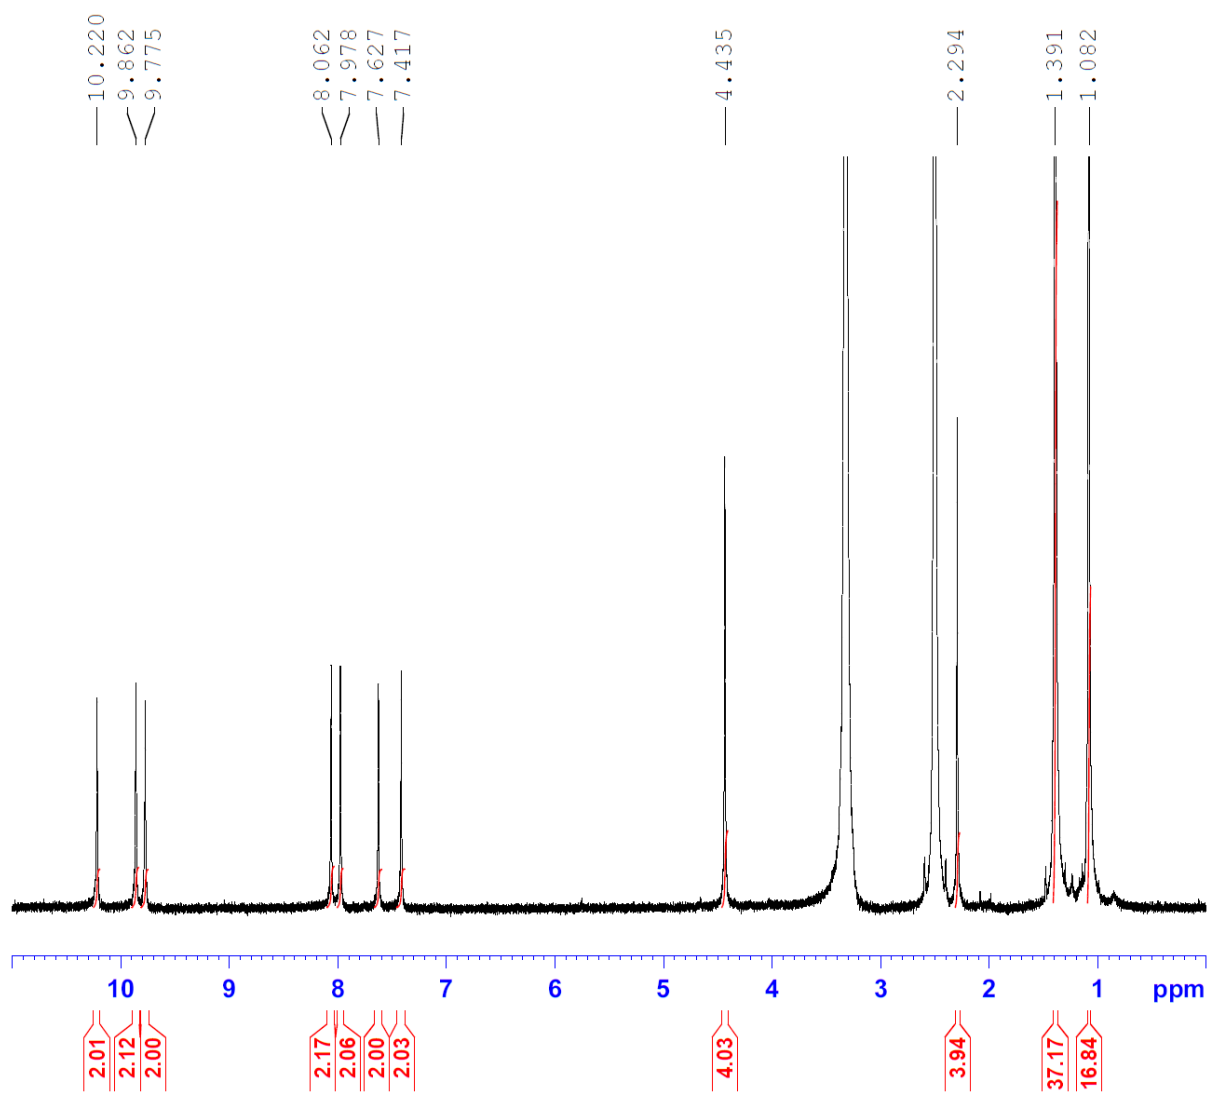

1.3.5.  $^{13}\text{C}$  NMR of Cz-Gly-NeP in DMSO- $\text{d}_6$

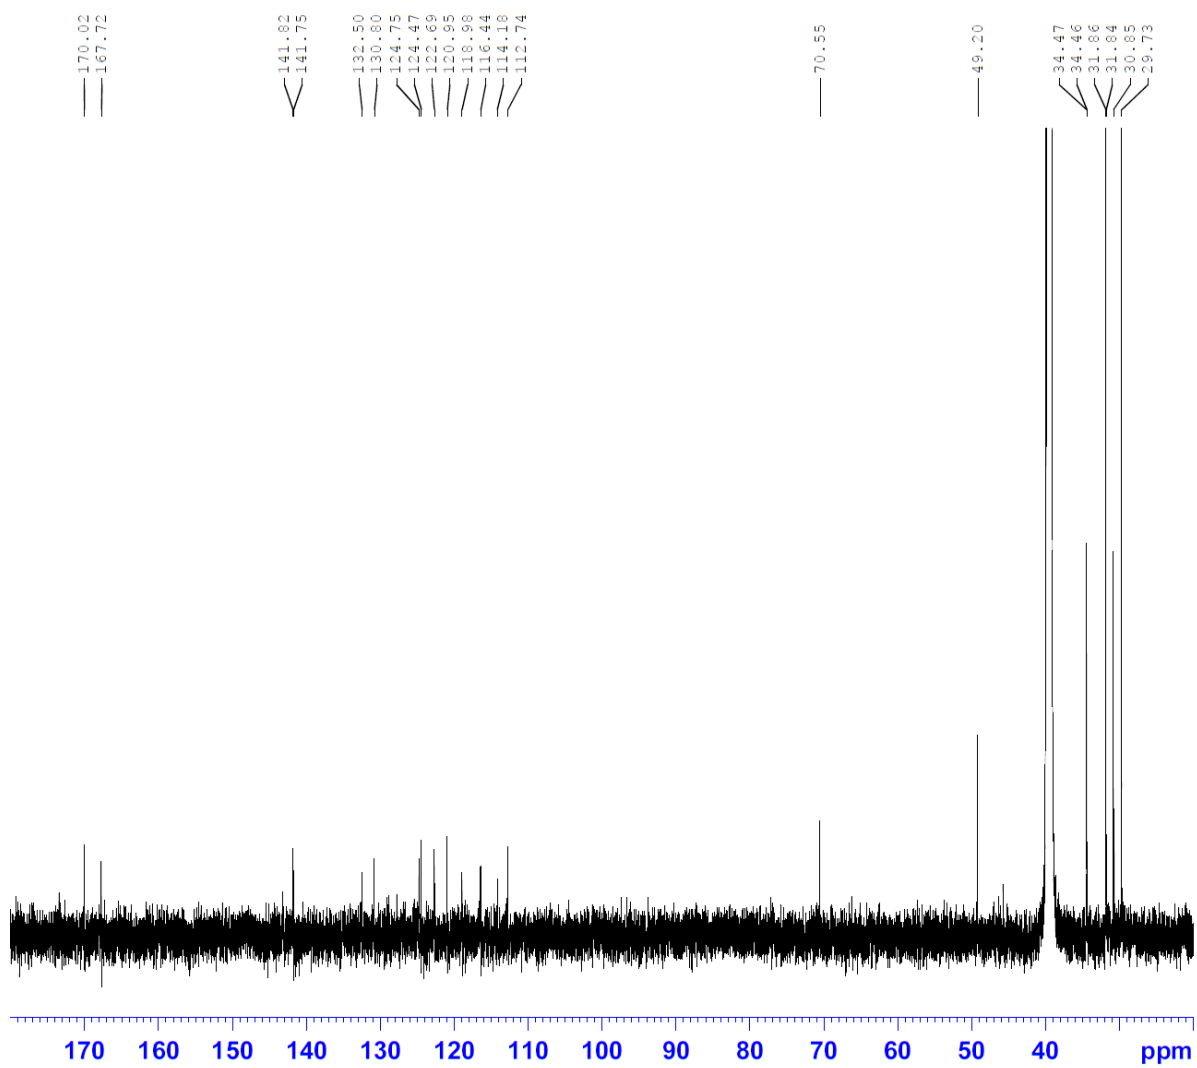

### 1.3.6. HRMS spectrum of Cz-Gly-NeP

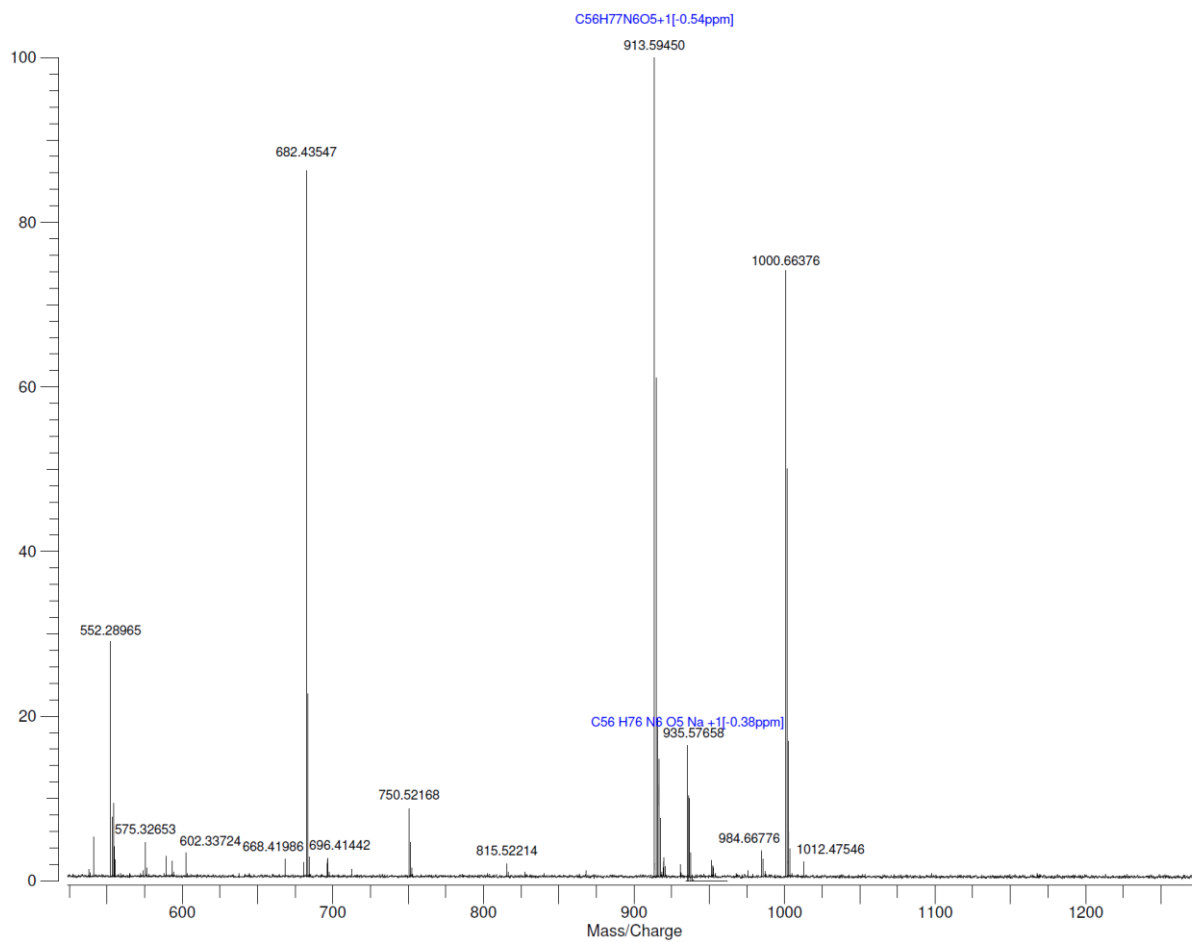

1.3.7.  $^1\text{H}$  NMR of CzU-Py in  $\text{DMSO-d}_6$

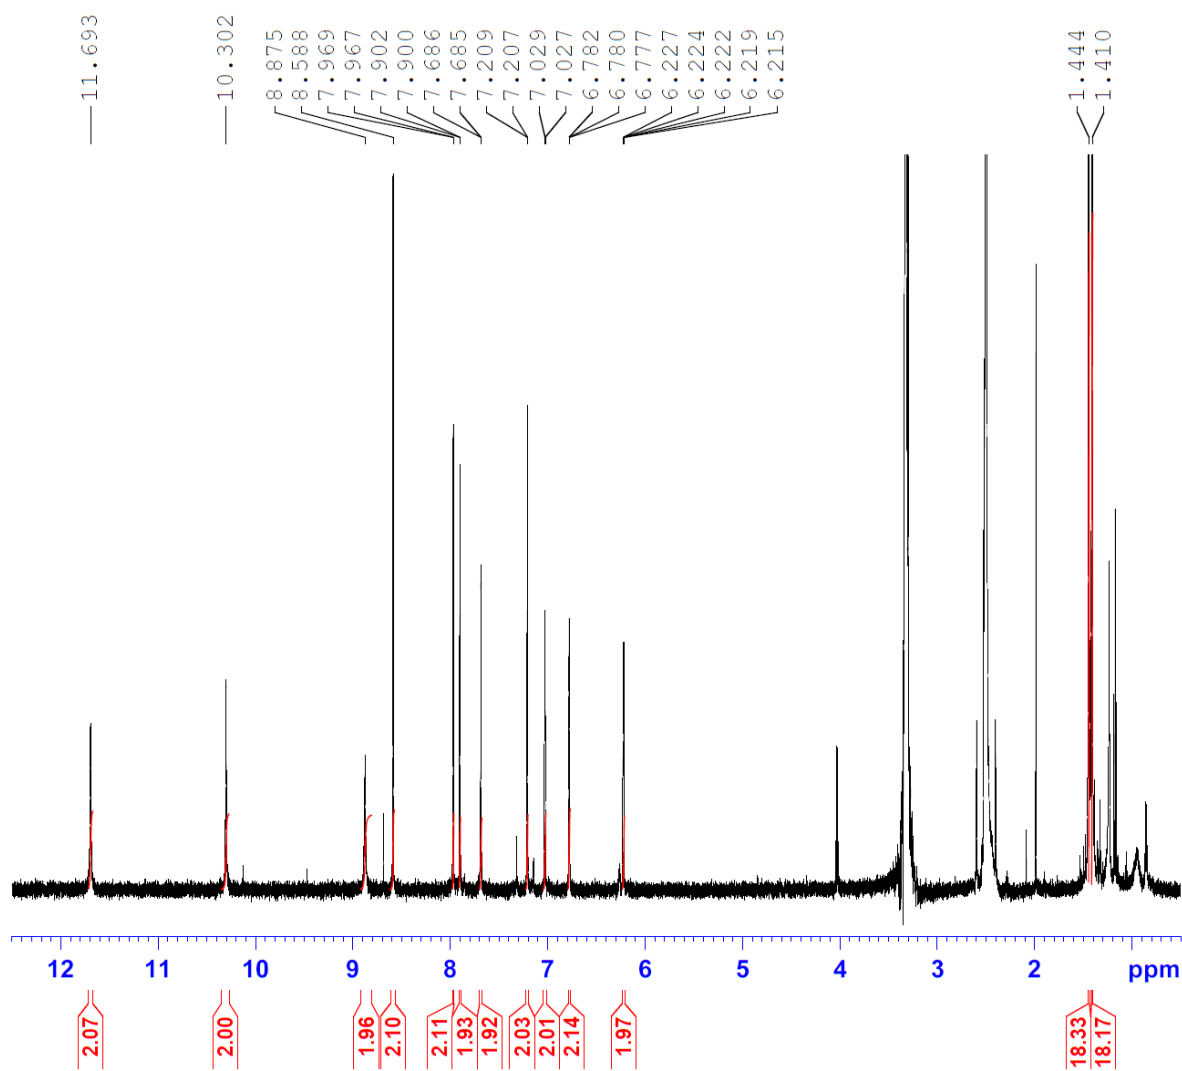

1.3.8.  $^{13}\text{C}$  NMR of CzU-Py in DMSO- $d_6$

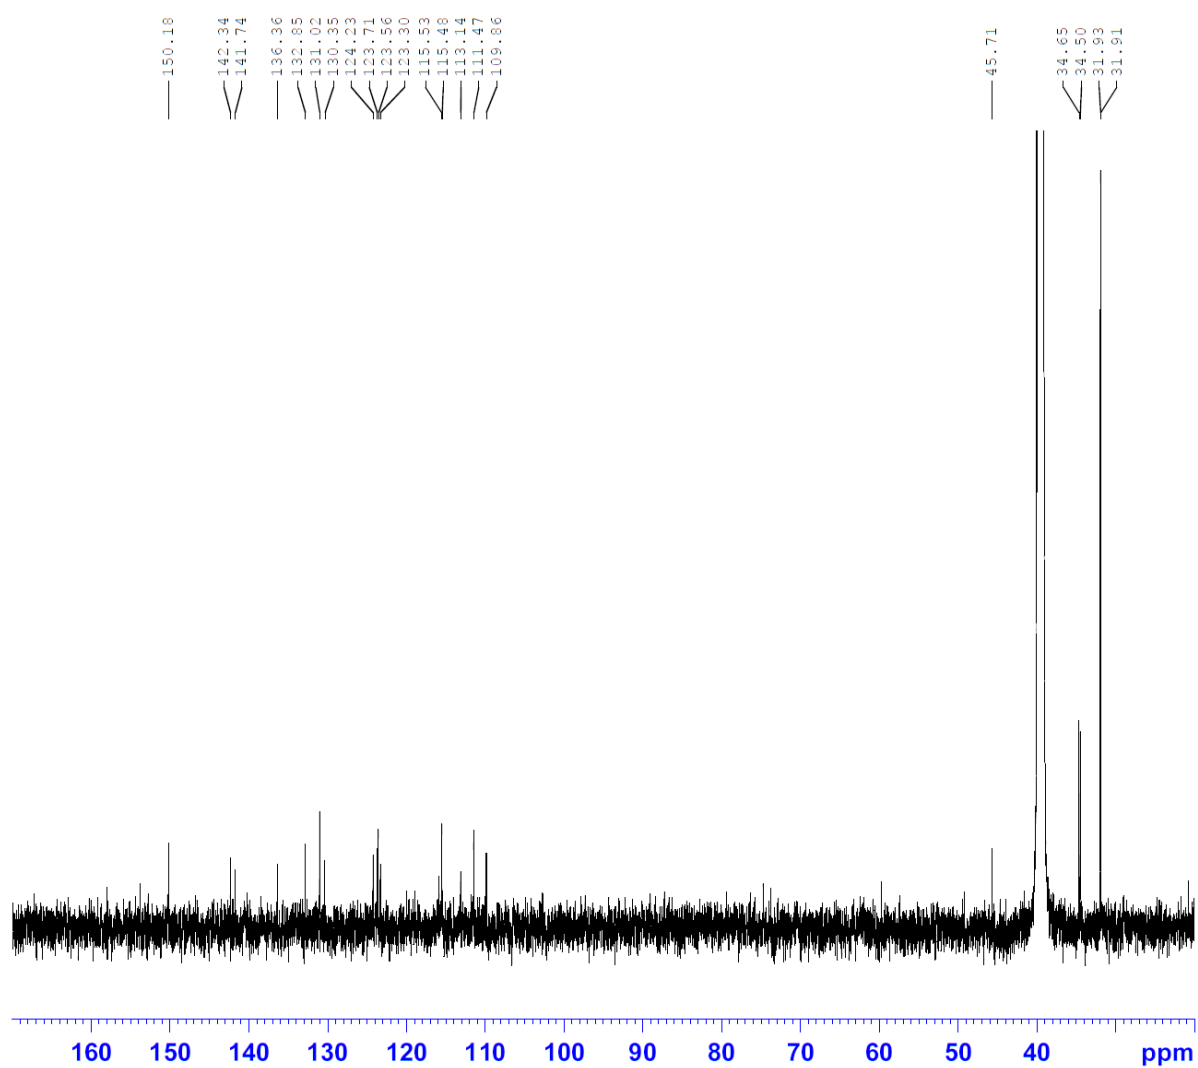

### 1.3.9. HRMS spectrum of CzU-Py

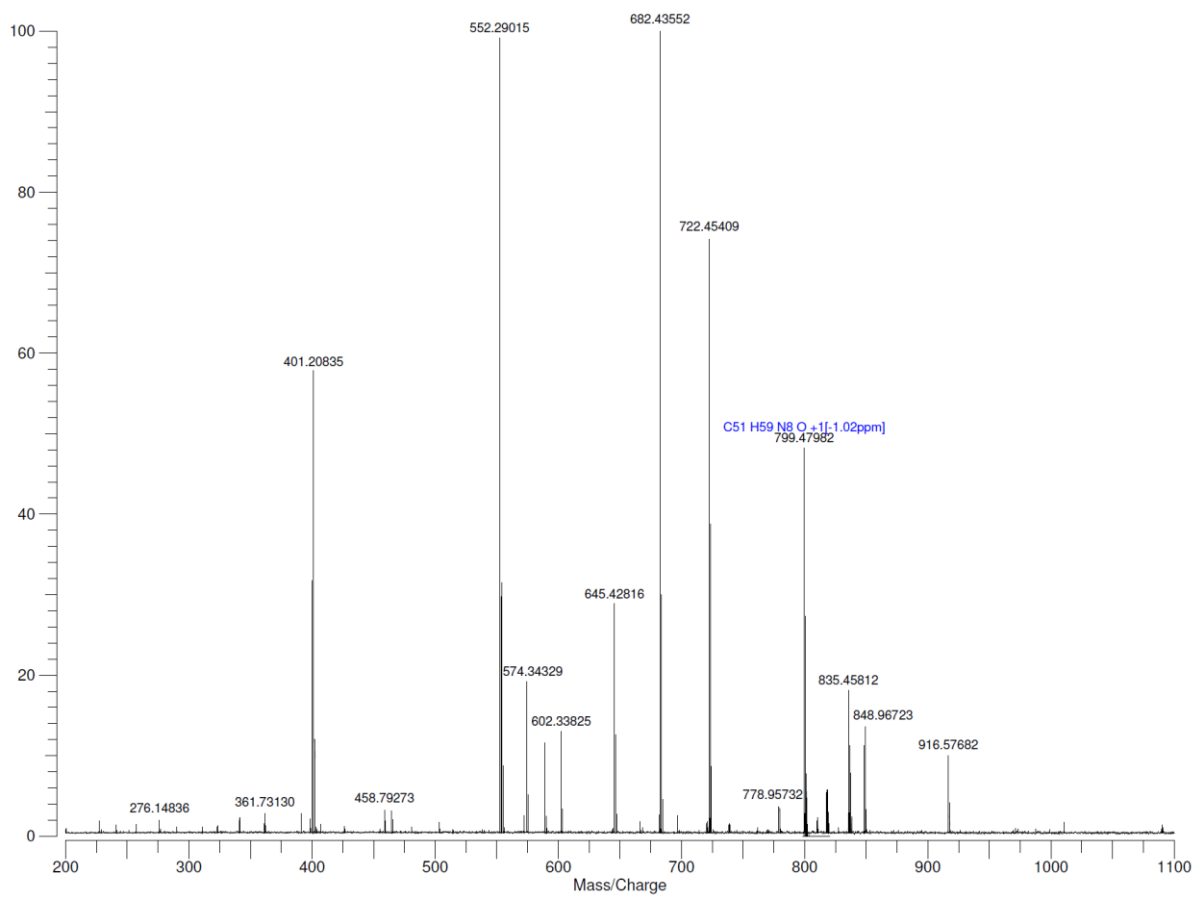



1.3.10.  $^1\text{H}$  NMR of CzU-DPM in  $\text{DMSO-d}_6$

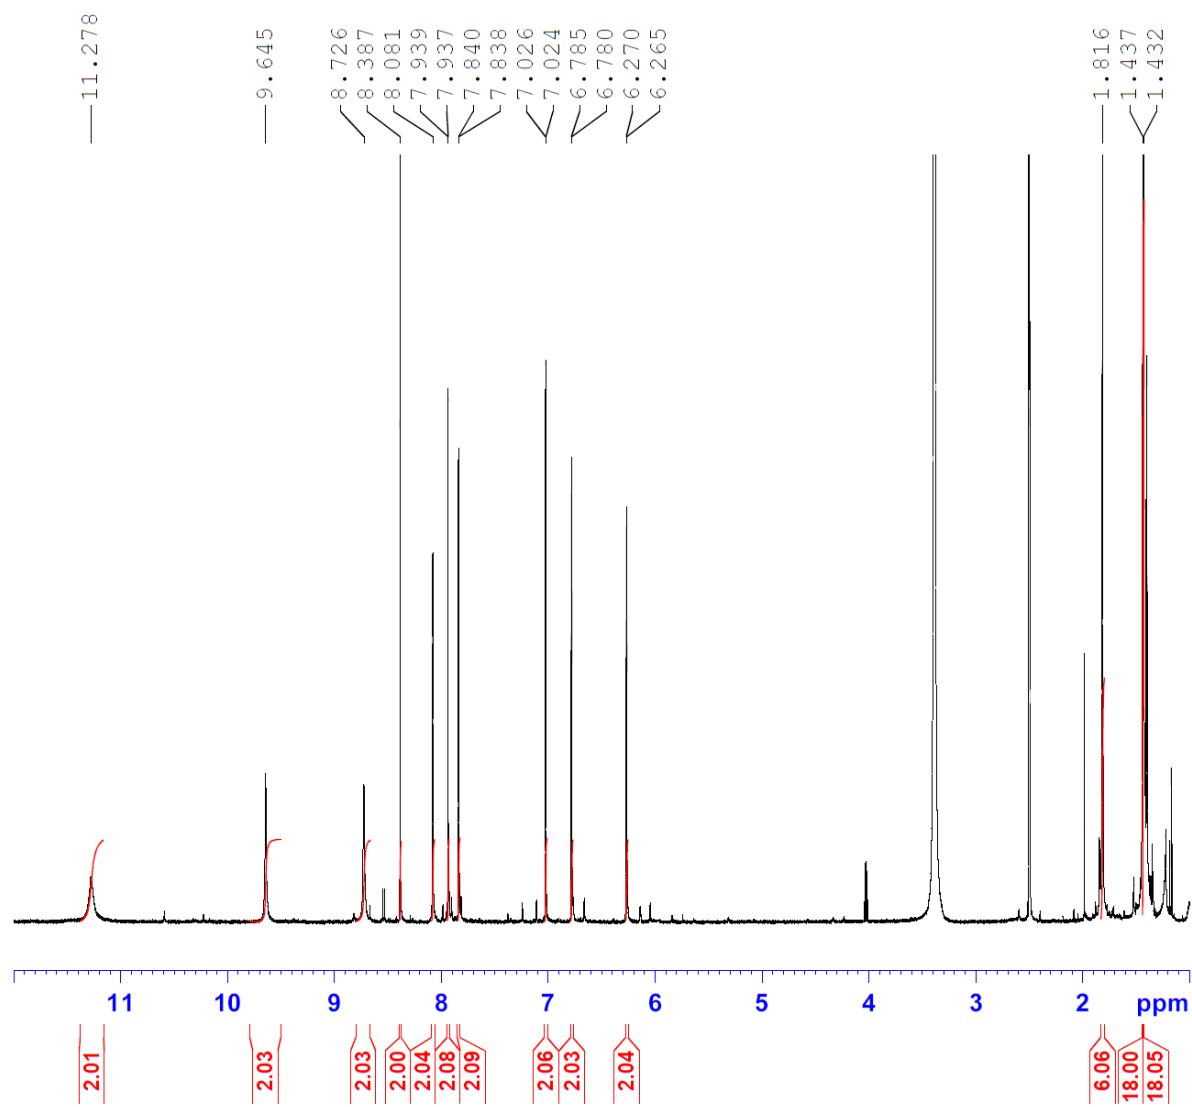

1.3.11.  $^{13}\text{C}$  NMR of CzU-DPM in  $\text{DMSO-d}_6$

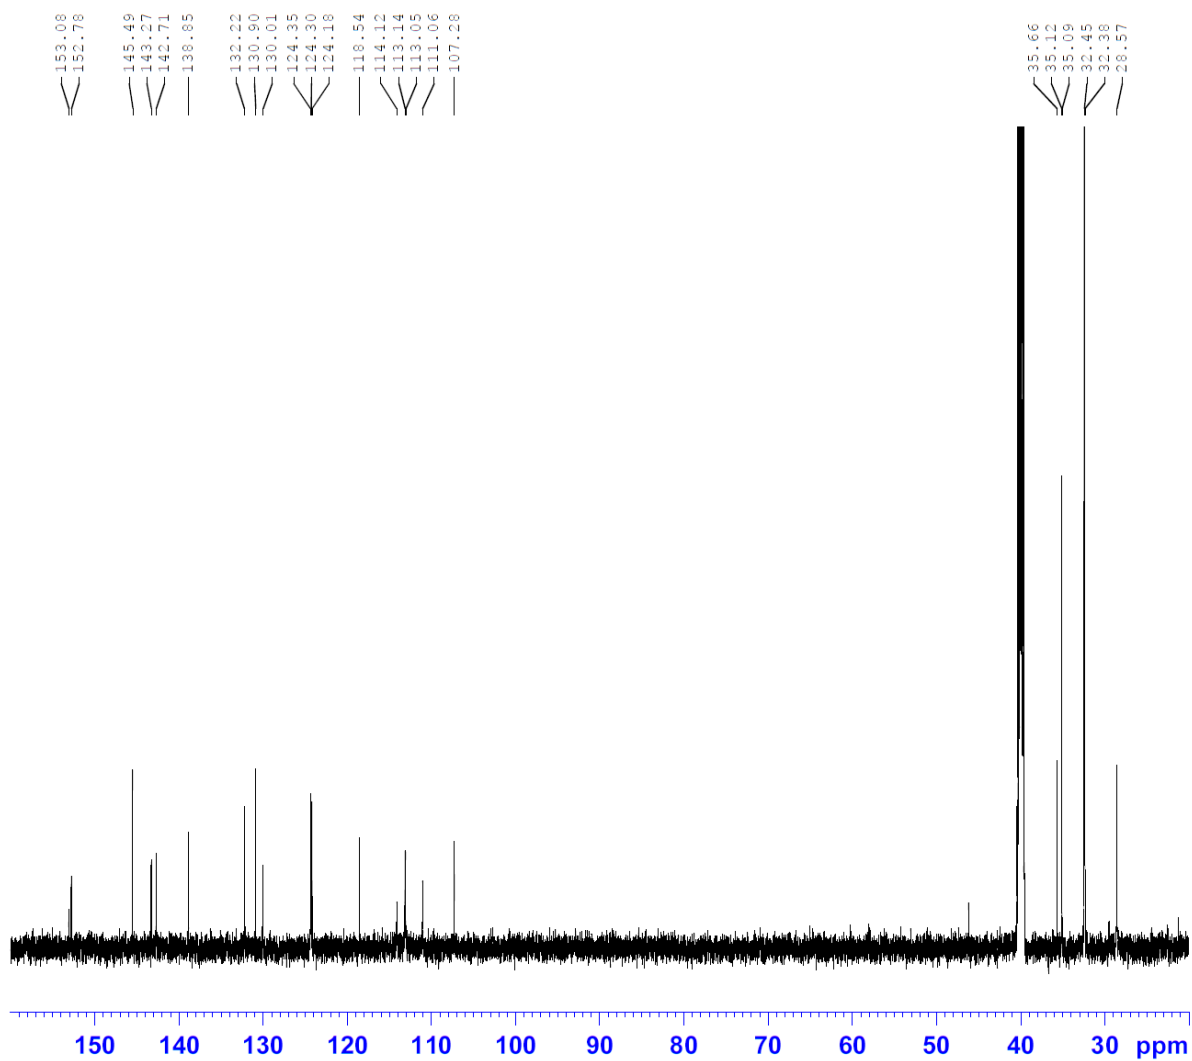

1.3.12. HRMS spectrum of CzU-DPM

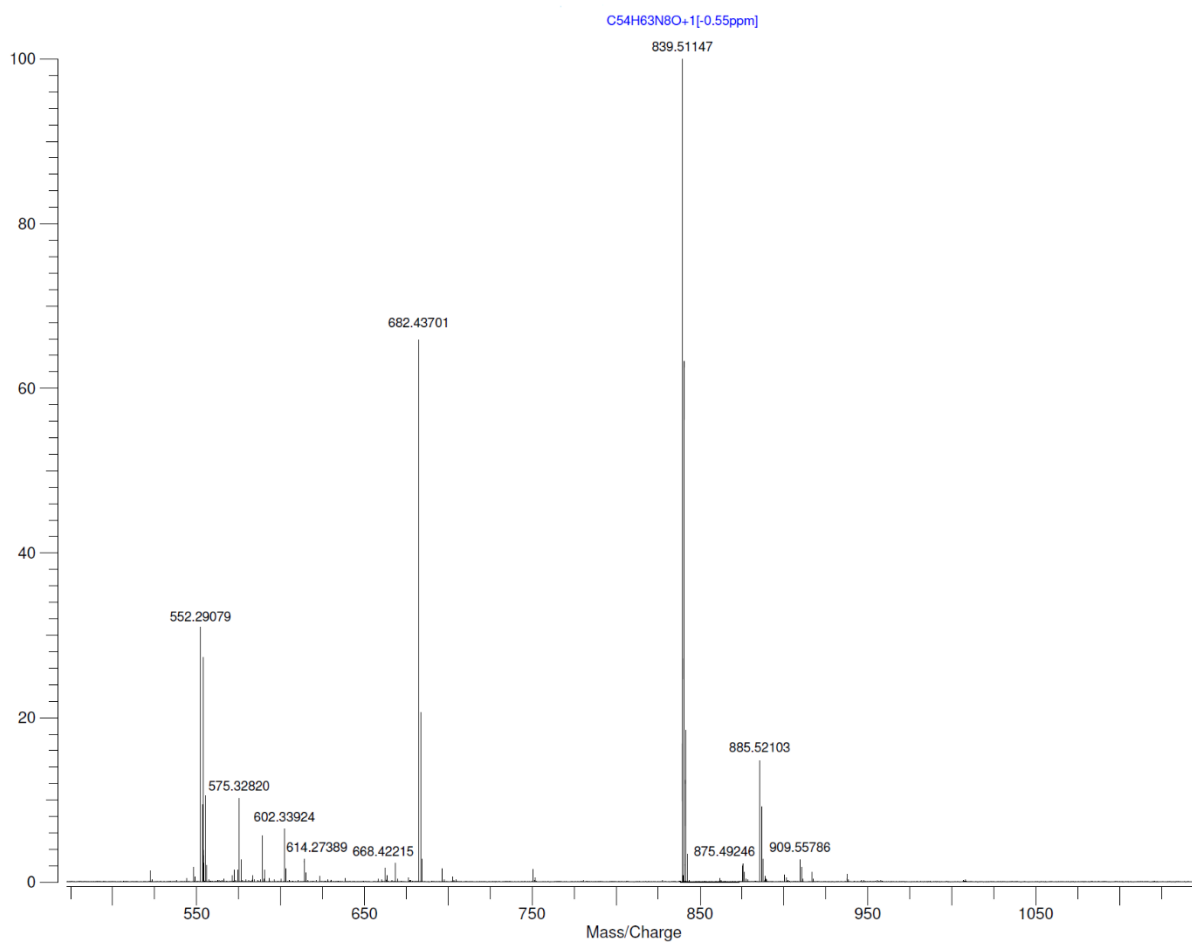

1.3.13.  $^1\text{H}$  NMR of CzU-BA in  $\text{DMSO-d}_6$

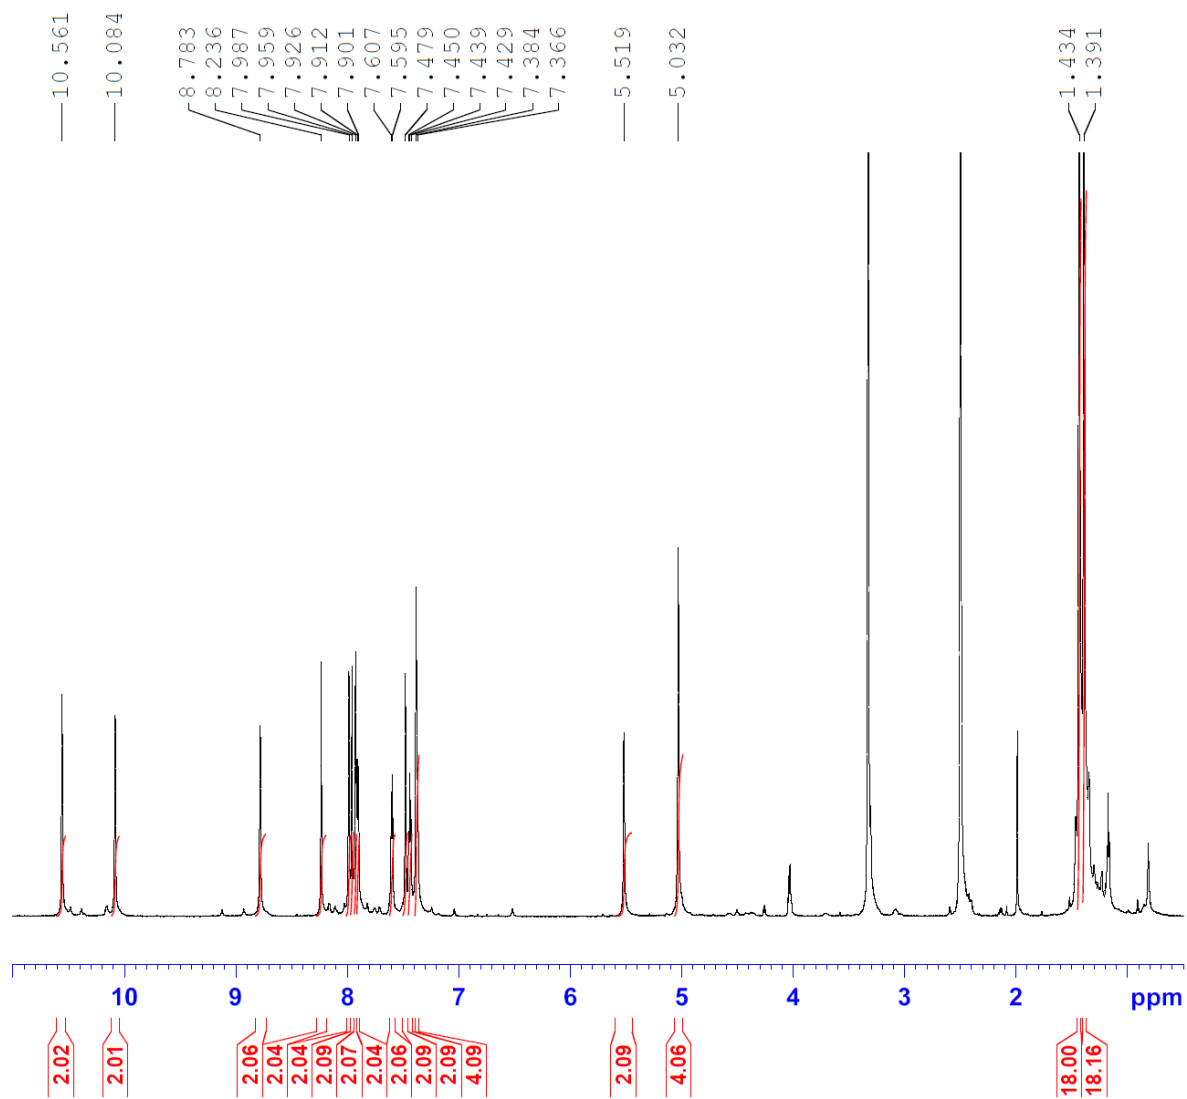

1.3.14.  $^{13}\text{C}$  NMR of CzU-BA in  $\text{DMSO-d}_6$

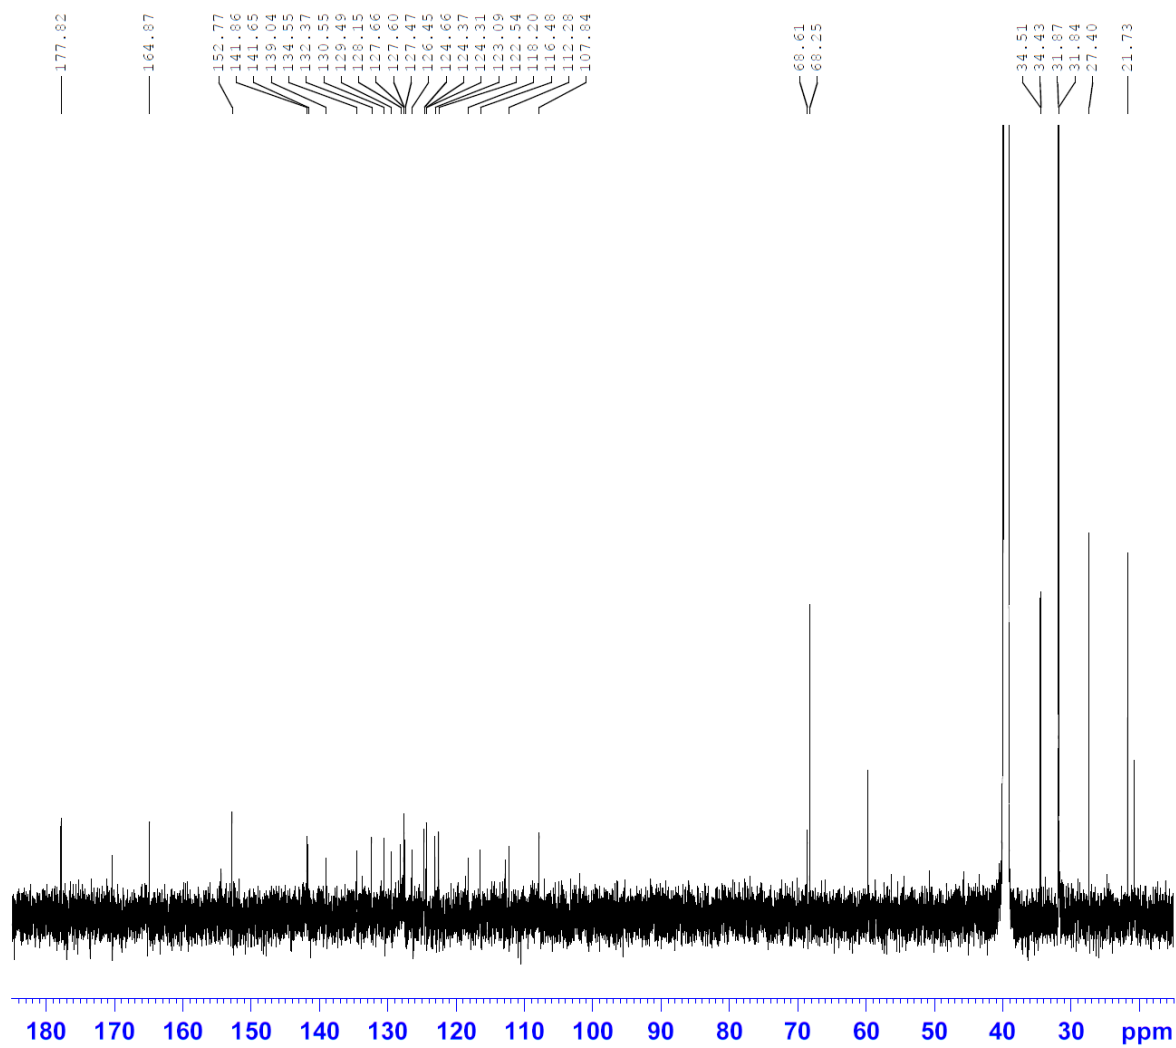

1.3.15. HRMS spectrum of CzU-BA

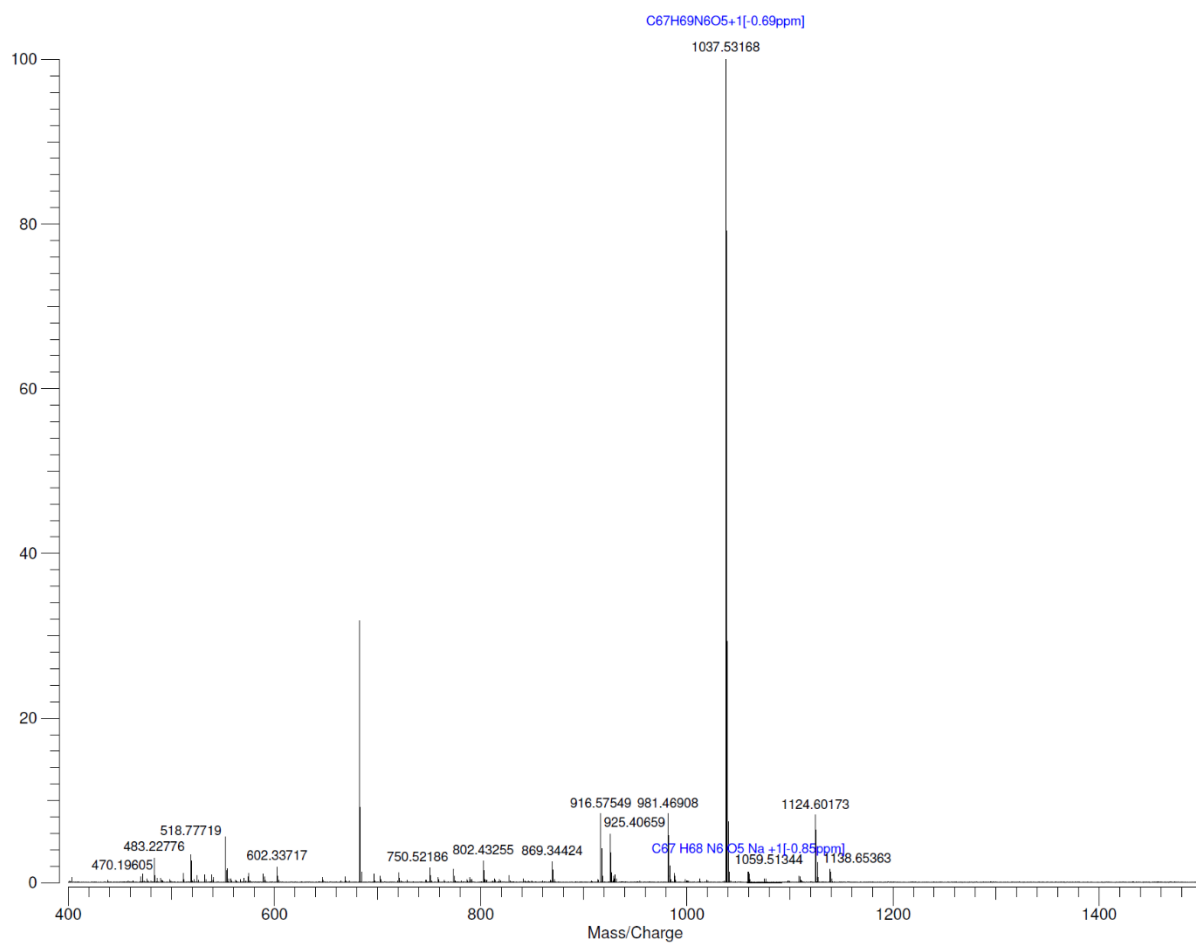

1.3.16.  $^1\text{H}$  NMR of CzU-BB in  $\text{DMSO-d}_6$

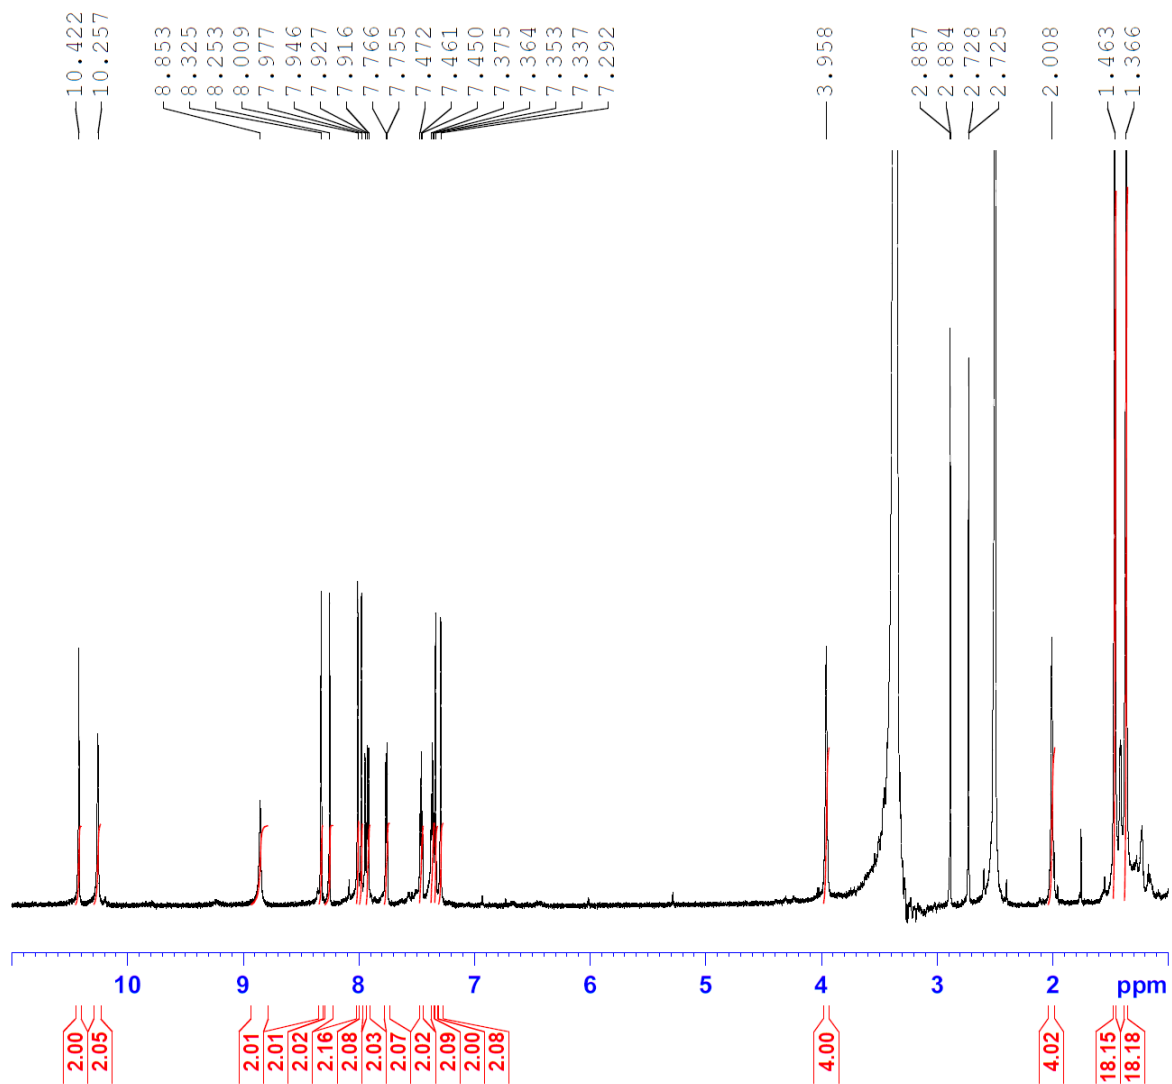

1.3.17.  $^{13}\text{C}$  NMR of CzU-BB in DMSO- $d_6$

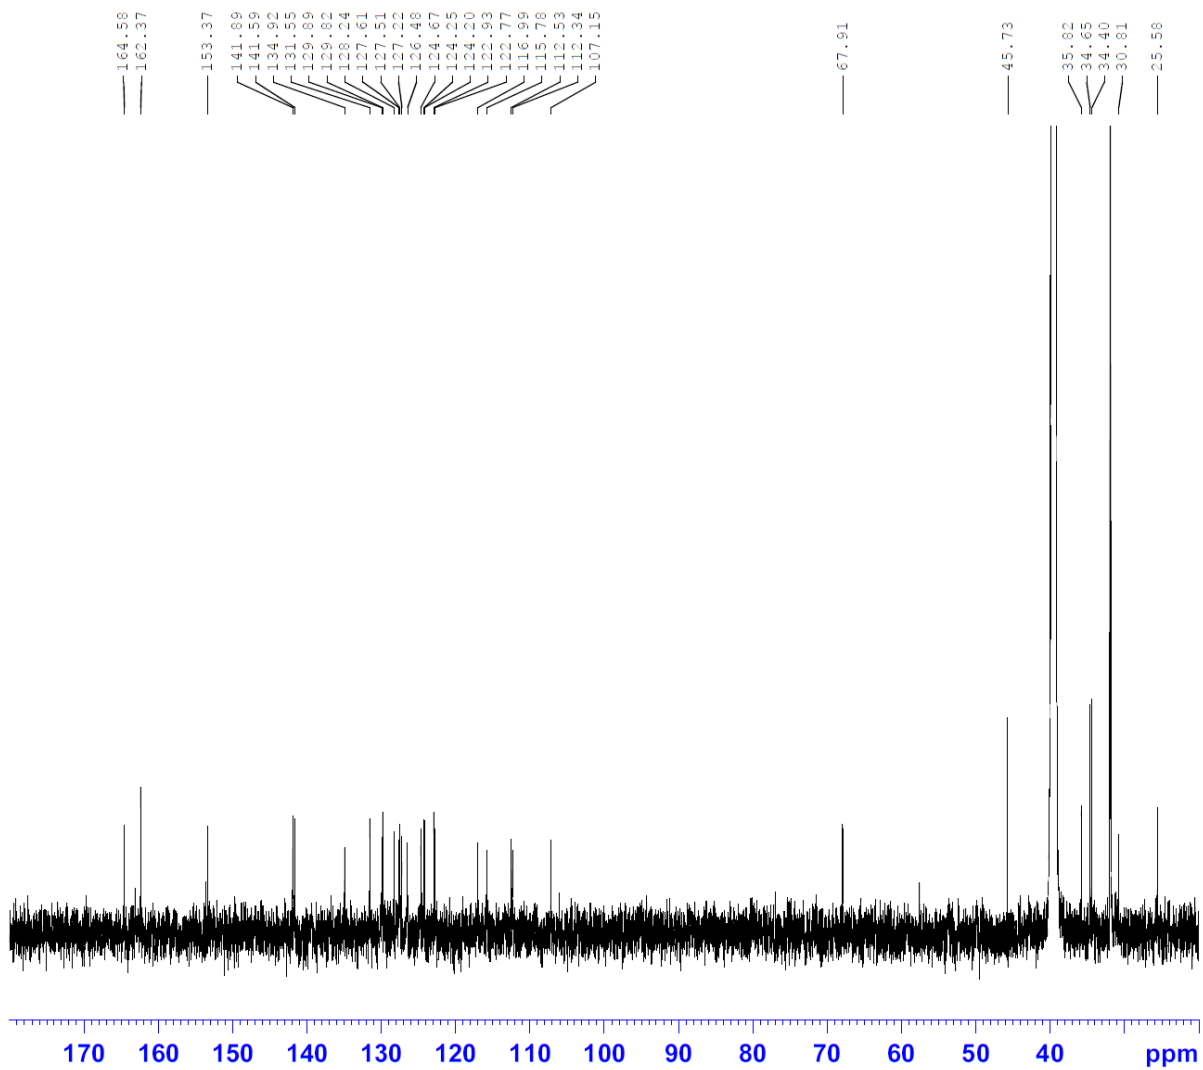



1.3.18. HRMS spectrum of CzU-BB

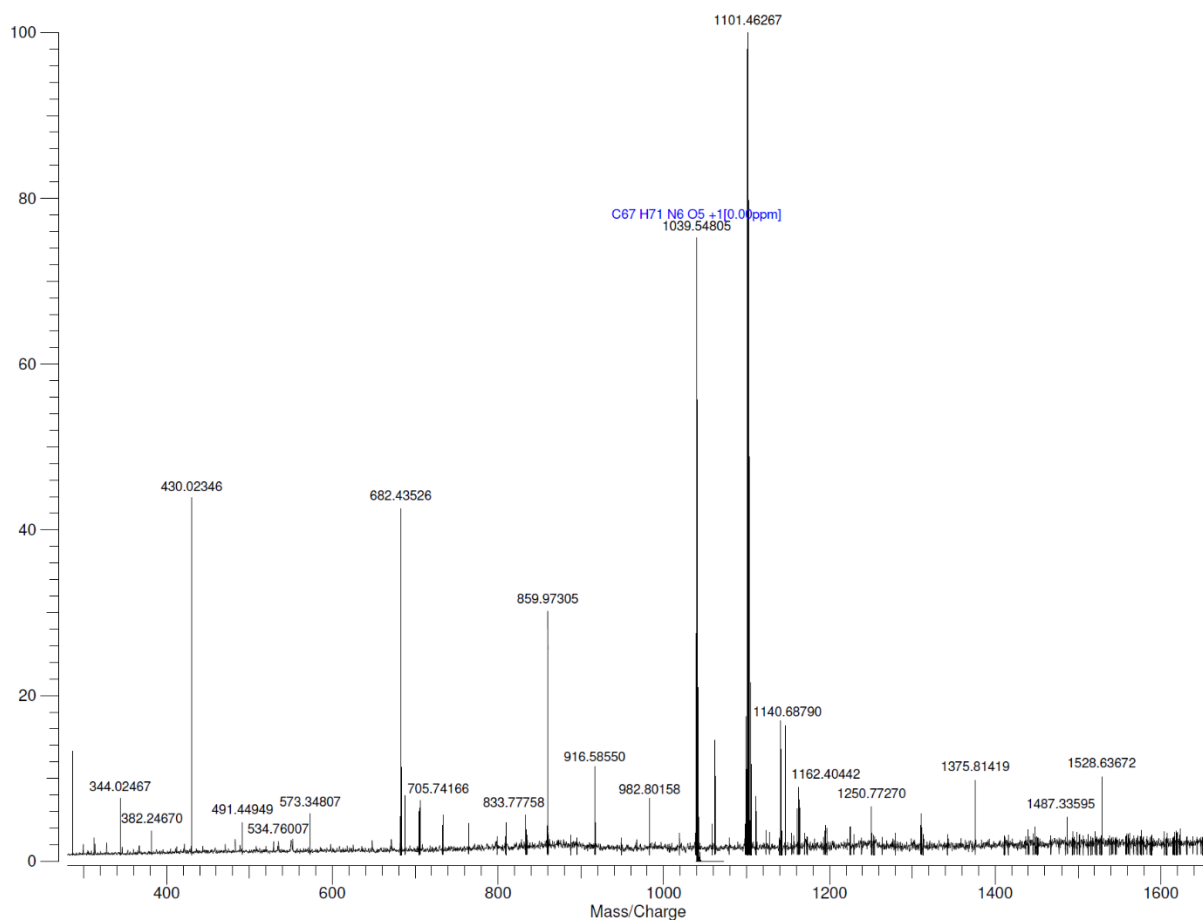

## 2. Relative binding affinity measurements

For sample preparation, a few milligrams of receptors were weighed into a NMR tube alongside an anchor molecule, to which binding had previously been quantified using absolute binding measurements.<sup>5</sup> The compounds were dissolved in 700  $\mu\text{L}$  DMSO- $\text{d}_6$  with a water content of 0.5%  $\text{H}_2\text{O}$  (m/m). DMSO- $\text{d}_6$  99.8% and water from MilliQ Advantage A10 system were used. Solutions of carboxylates were prepared by weighing the corresponding tetrabutylammonium salts into vials and dissolving them in 1 mL DMSO- $\text{d}_6$  with a water content of 0.5%  $\text{H}_2\text{O}$  (m/m). Some of the earlier measurements (specifically with receptors Cz-Gly-NeP and CzU-NeP) were made with DMSO- $\text{d}_6$  with a water content of 0.5% (v/v)  $\text{H}_2\text{O}$ . In order to see how much this affects the results, some of the measurements were repeated in DMSO- $\text{d}_6$ /H $_2\text{O}$  0.5 % (m/m), and the findings were exactly the same as when using DMSO- $\text{d}_6$ /H $_2\text{O}$  0.5 % (v/v). Thus, all reported results refer to DMSO- $\text{d}_6$  with a water content of 0.5% (m/m)  $\text{H}_2\text{O}$ .

For each anion, two solutions were prepared: a dilute and a concentrated solution. During the titration, a blank spectrum of pure receptors was initially obtained. Then, the anion solution was added using an automatic titration syringe. The chemical shifts of the formed host-guest complexes were recorded for each titration step. The dilute solution was used during the first part of the titration, where complexation was partial. The concentrated solution was used towards the end of the titration to ensure full complexation of all host molecules in solution. The recorded chemical shifts of all titration steps were used to calculate the differences of binding affinity with respect to the anchor molecules,  $\Delta\log K_{\text{ass}}$ , as described in reference.<sup>4</sup> NMR spectra of all titration experiments are available below.

2.1  $^1\text{H}$  NMR spectra (700.1 MHz) of a mixture of receptors CzU-NeP; 1,3-diindolylurea; 1,3-dicarbazolylurea + TBA-acetate

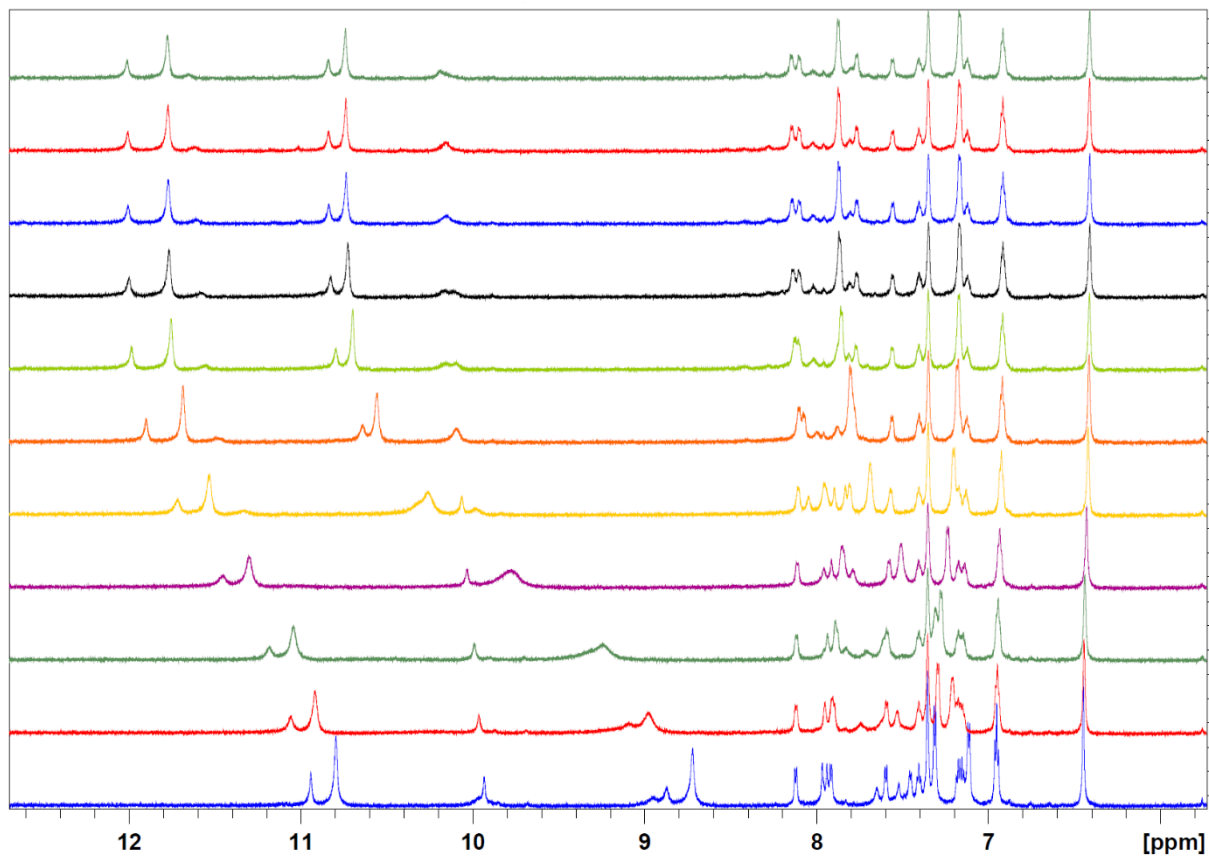

2.2  $^1\text{H}$  NMR spectra (700.1 MHz) of a mixture of receptors Cz-Gly-NeP; 1,3-diindolylurea; 1,3-dicarbazolyurea + TBA-acetate

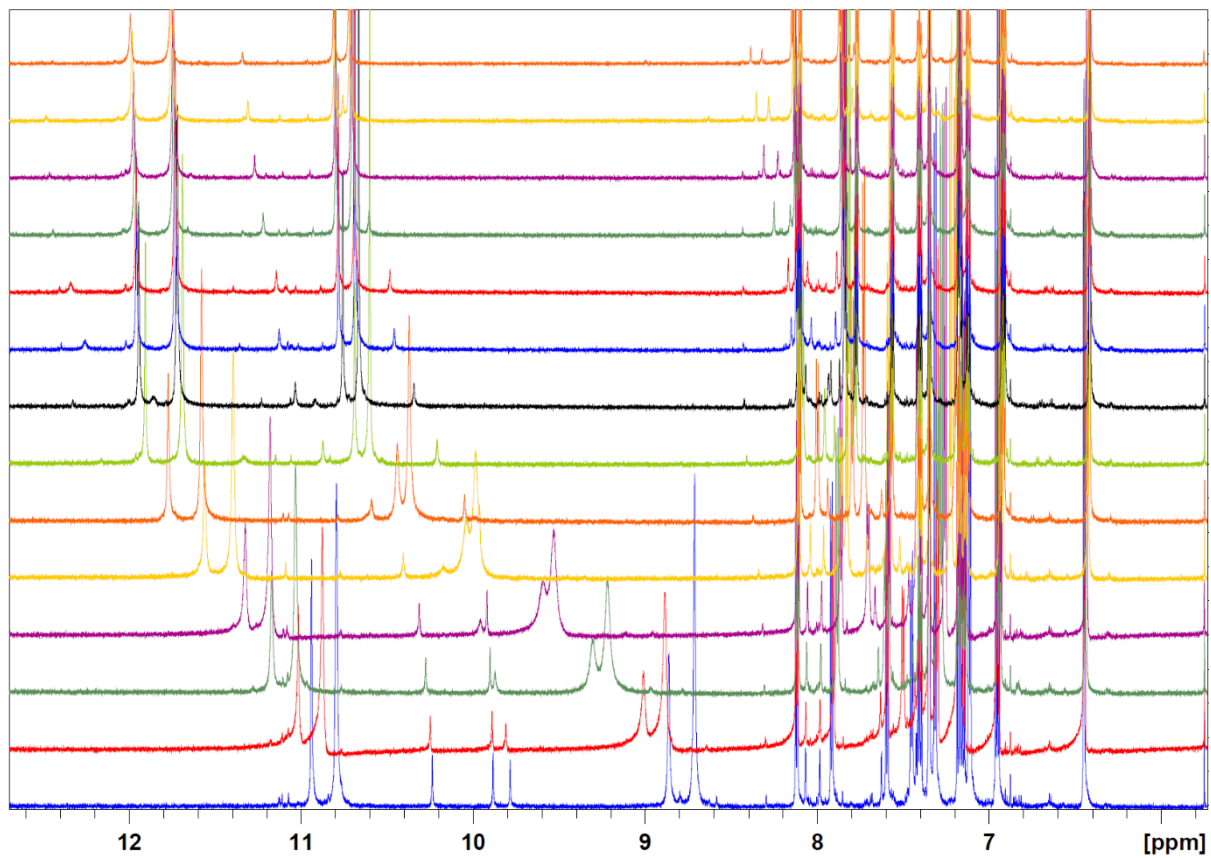

2.3  $^1\text{H}$  NMR spectra (700.1 MHz) of a mixture of receptors CzU-Py; 1,3-diindolylurea; 1,3-dicarbazolylurea + TBA-acetate

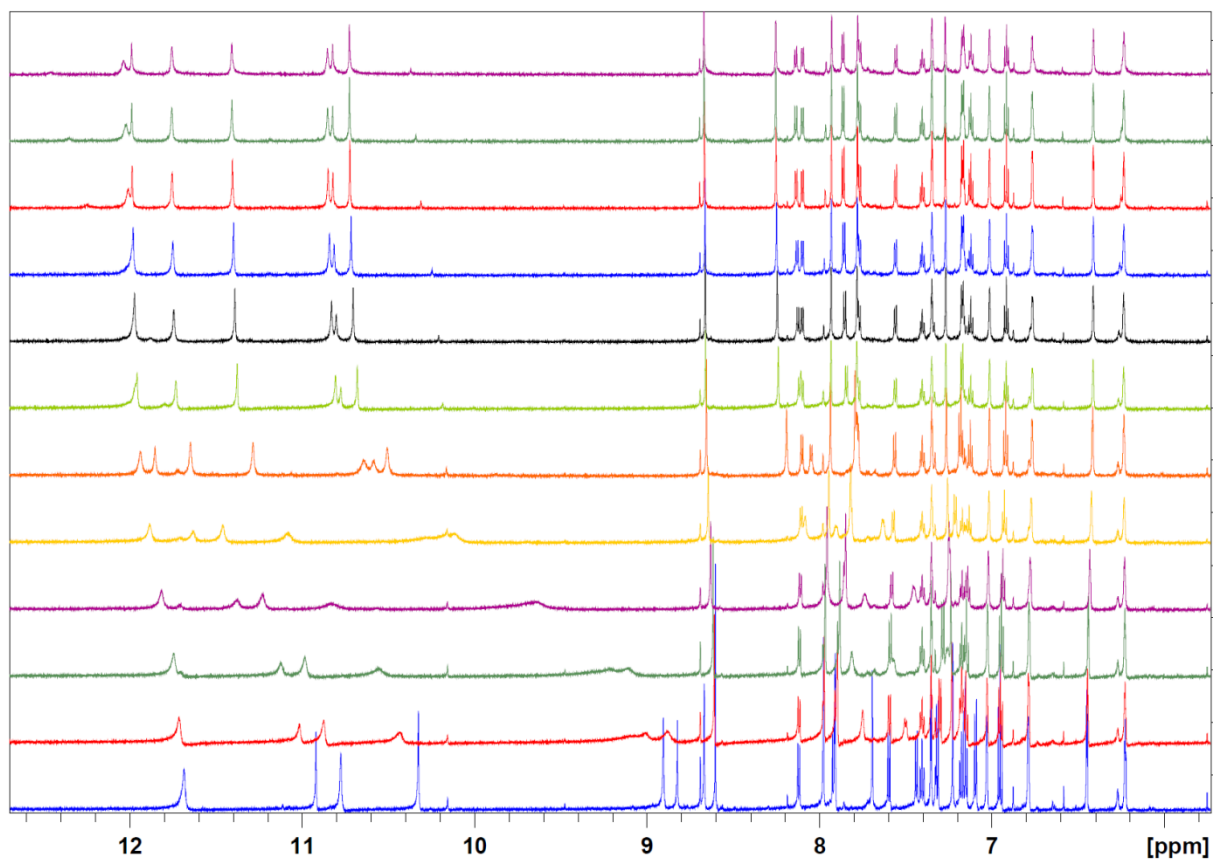

2.4  $^1\text{H}$  NMR spectra (700.1 MHz) of a mixture of receptors CzU-DPM; 1,3-diindolylurea; 1,3-dicarbazolylurea + TBA-acetate

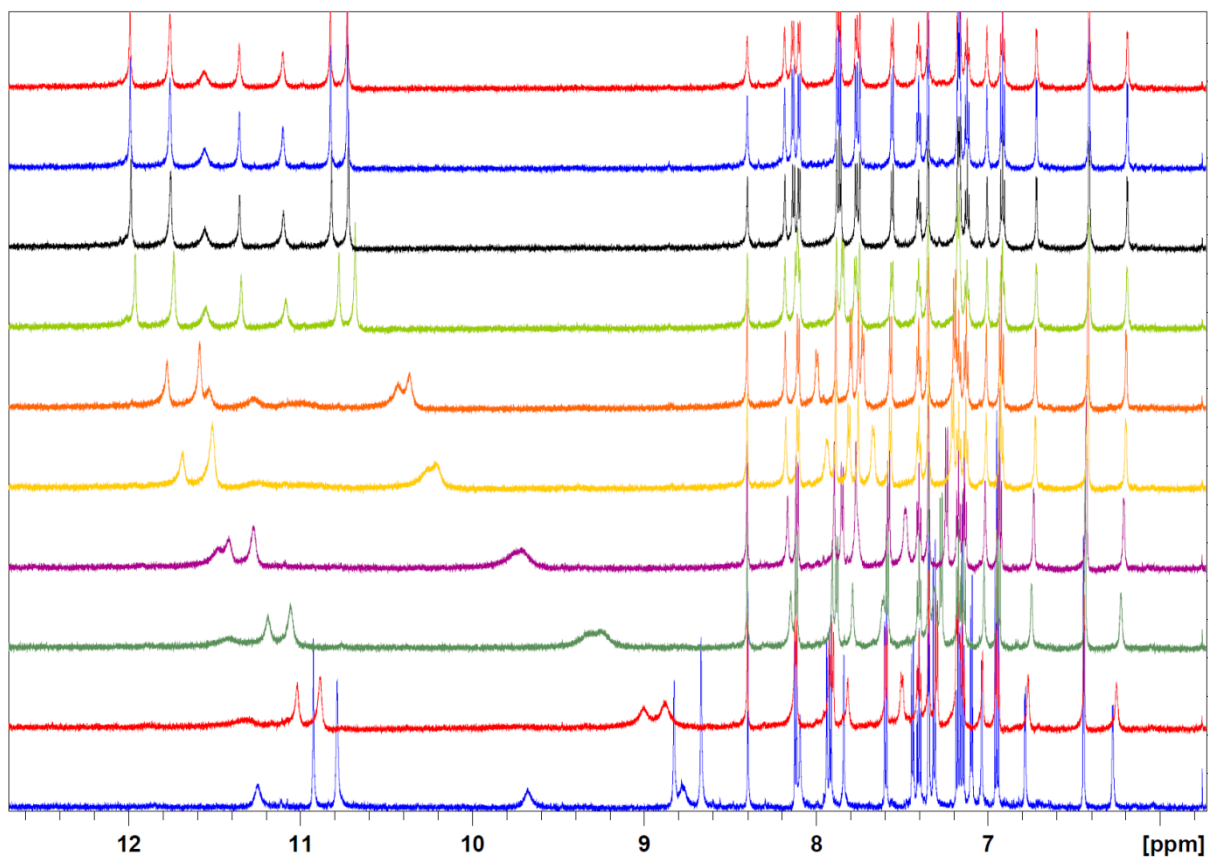

2.5  $^1\text{H}$  NMR spectra (700.1 MHz) of a mixture of receptors CzU-BA; 1,3-diindolylurea; 1,3-dicarbazolylurea + TBA-acetate

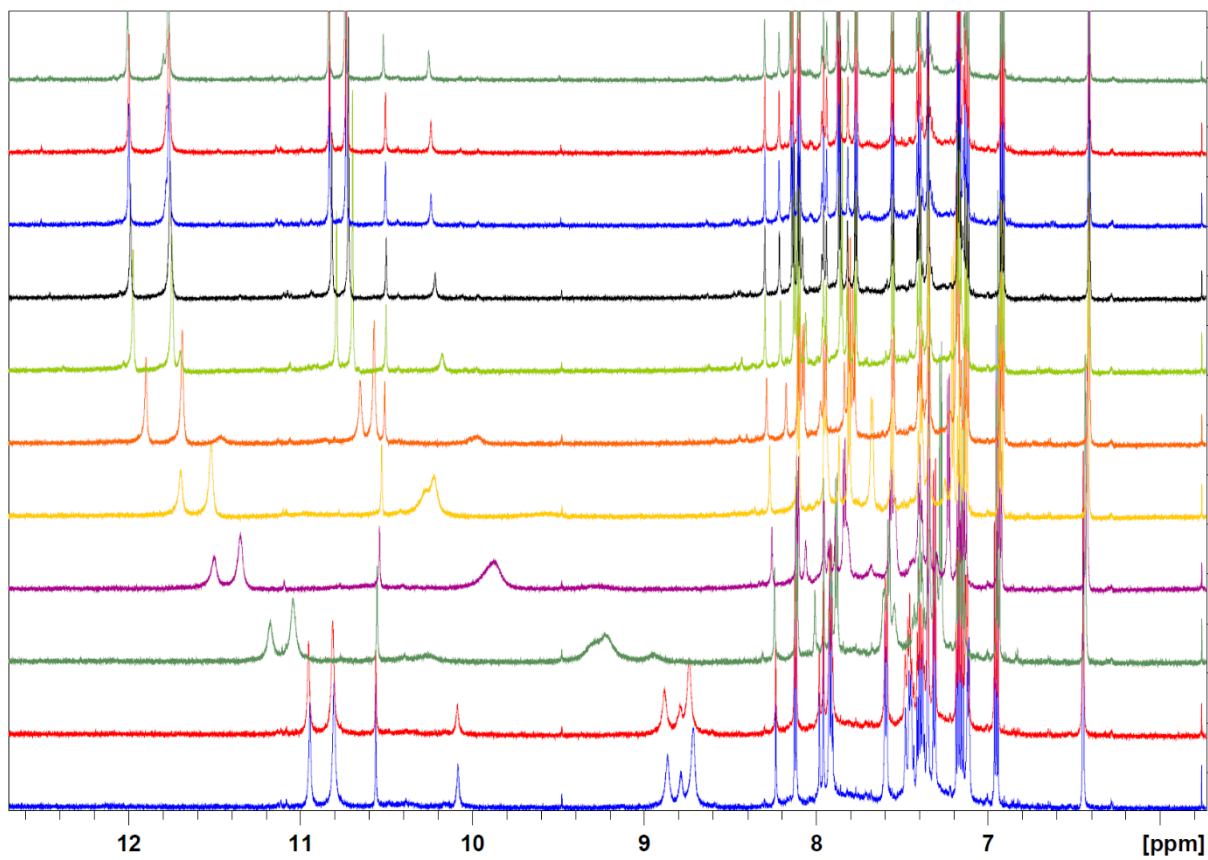

2.6  $^1\text{H}$  NMR spectra (700.1 MHz) of a mixture of receptors CzU-BB; 1,3-diindolylurea; 1,3-dicarbazoylurea + TBA-acetate

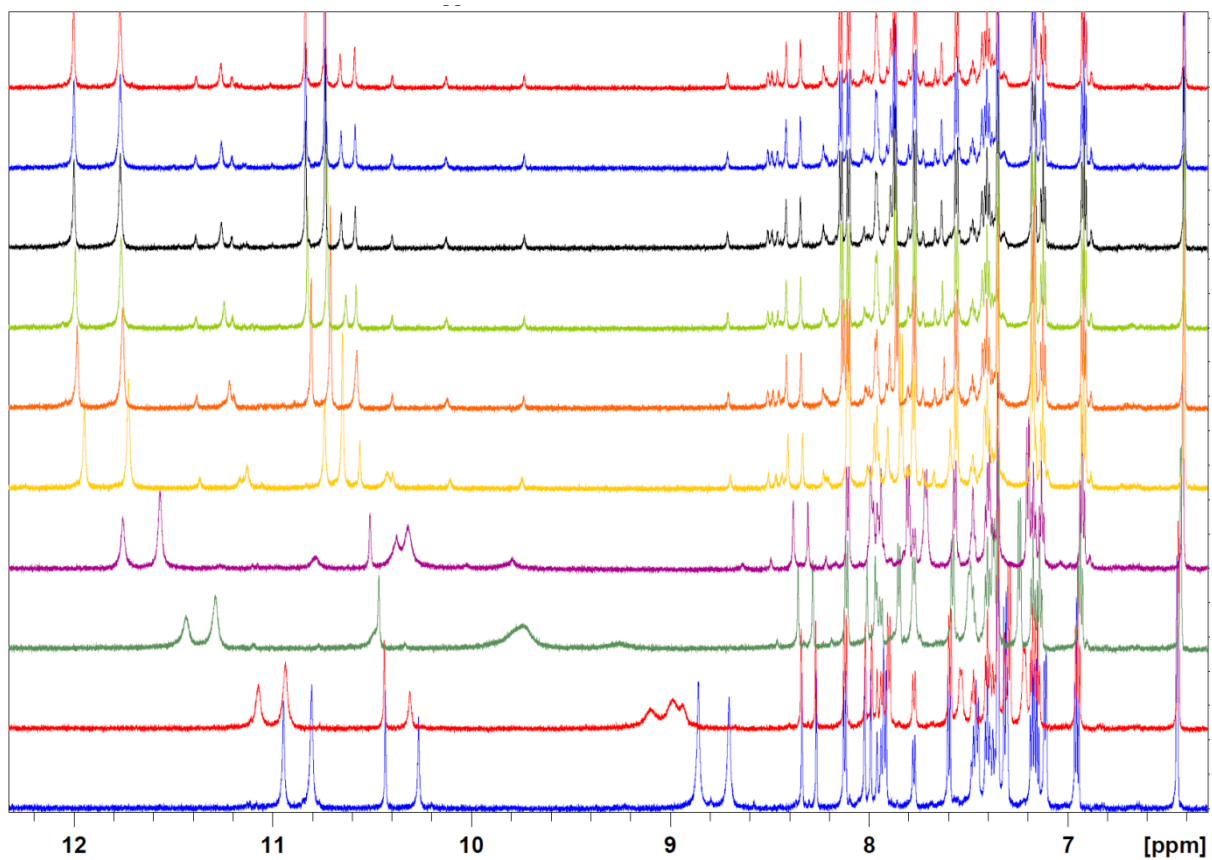



2.7  $^1\text{H}$  NMR spectra (700.1 MHz) of a mixture of receptors CzU-NeP; 1,3-diindolylurea; 1,3-dicarbazolylurea + TBA-benzoate

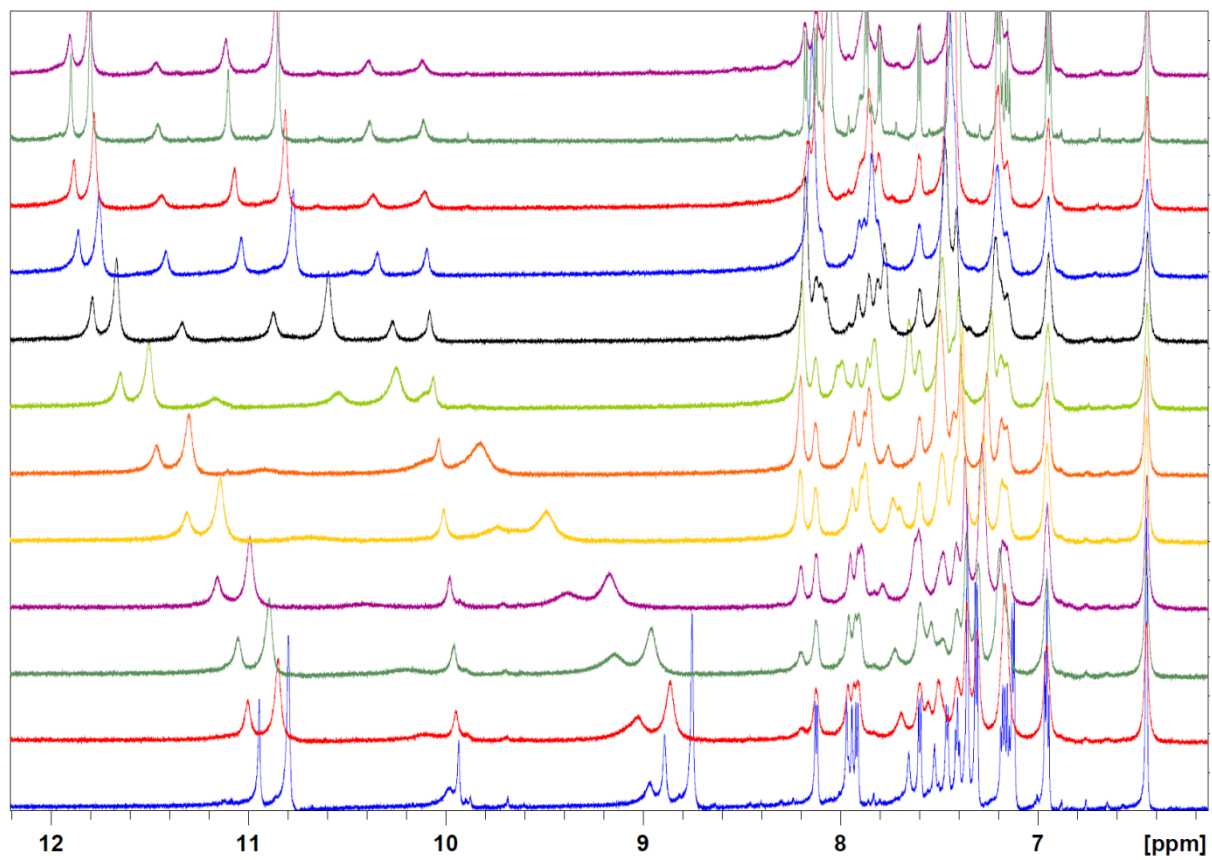

2.8  $^1\text{H}$  NMR spectra (700.1 MHz) of a mixture of receptors Cz-Gly-NeP; 1,3-diindolylurea; 1,3-dicarbazolyurea + TBA-benzoate

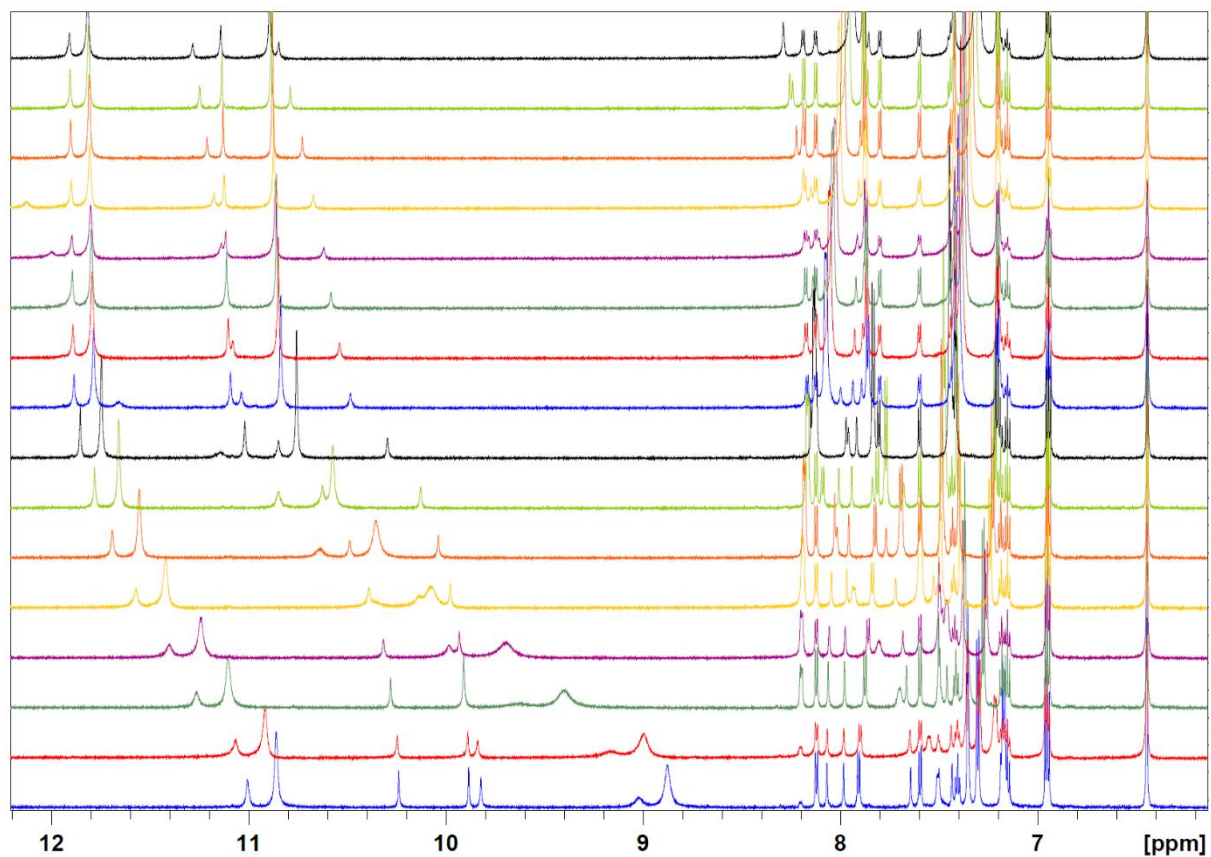

2.9  $^1\text{H}$  NMR spectra (700.1 MHz) of a mixture of receptors CzU-Py; 1,3-diindolylurea; 1,3-dicarbazolylurea + TBA-benzoate

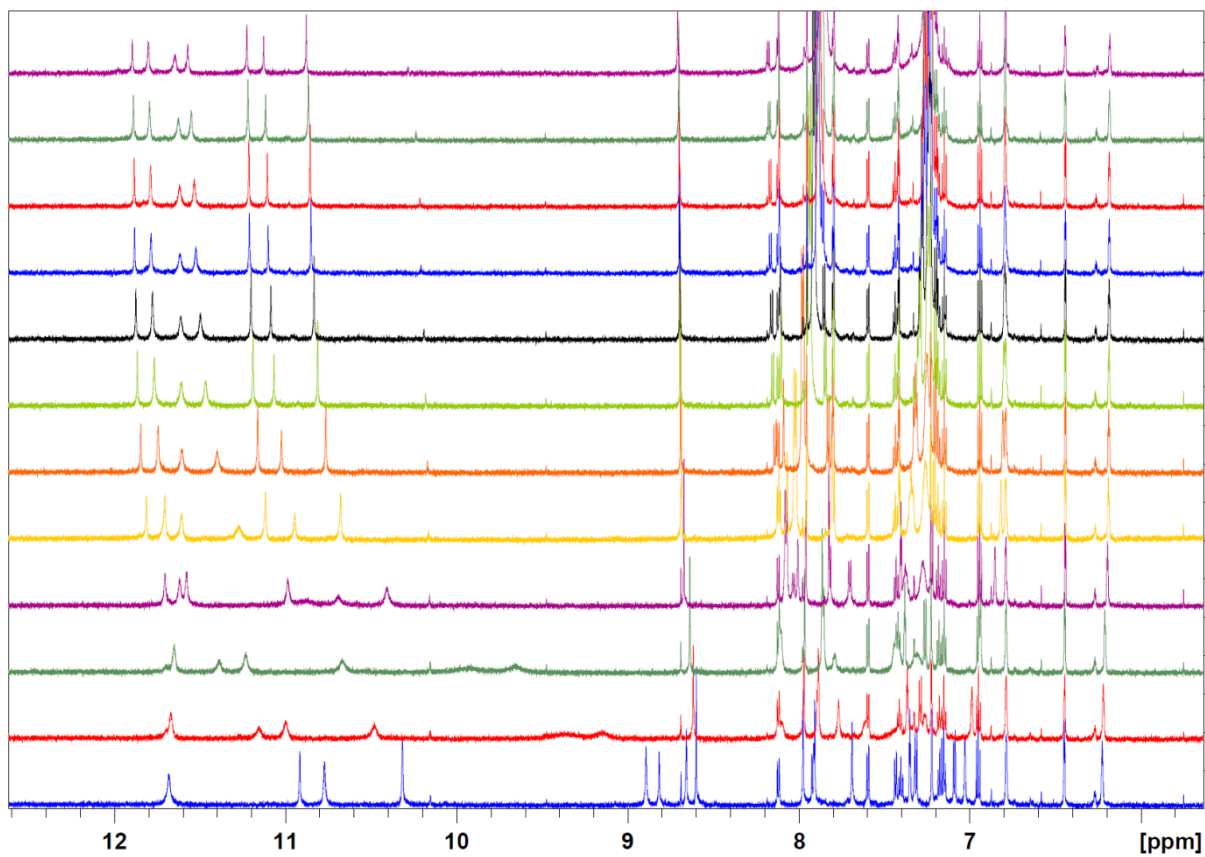

2.10  $^1\text{H}$  NMR spectra (700.1 MHz) of a mixture of receptors CzU-DPM; 1,3-diindolylurea; 1,3-dicarbazolylurea + TBA-benzoate

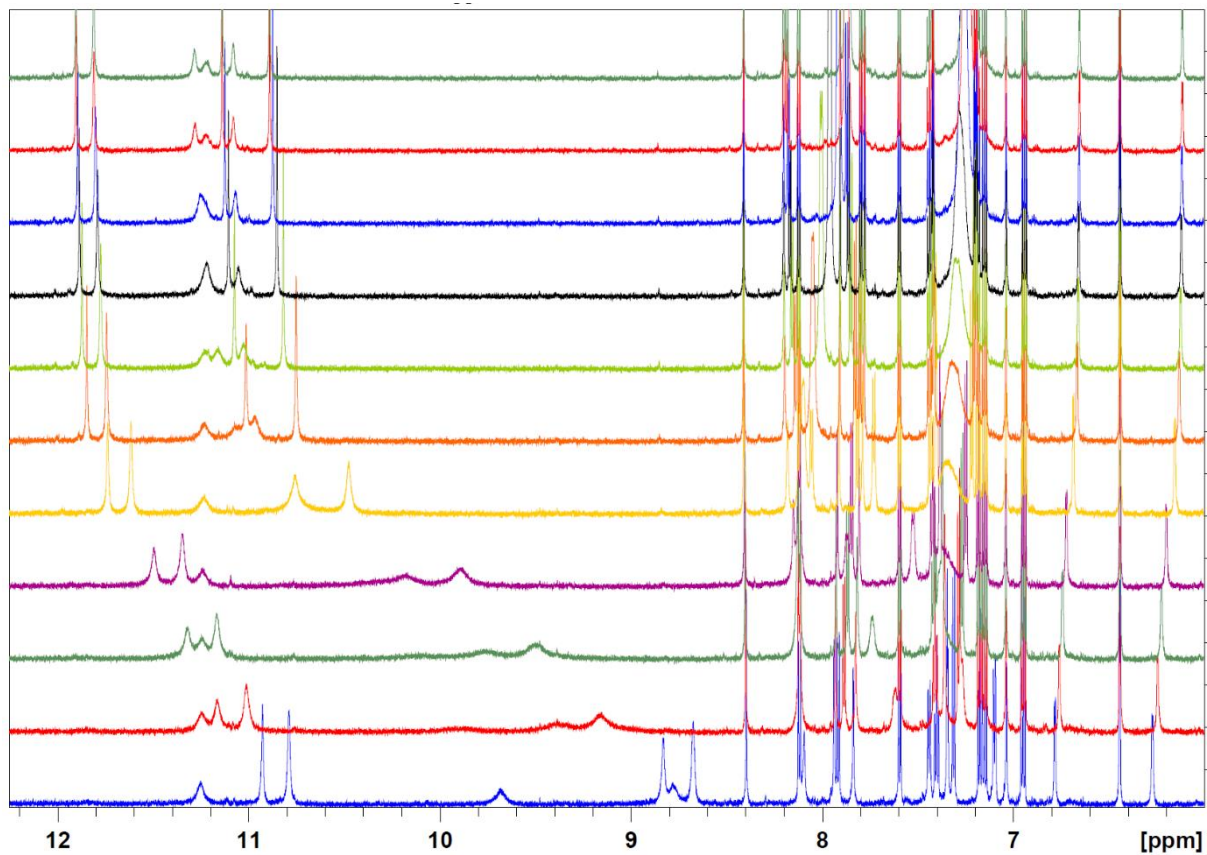

2.11  $^1\text{H}$  NMR spectra (700.1 MHz) of a mixture of receptors CzU-BA; 1,3-diindolylurea; 1,3-dicarbazolylurea + TBA-benzoate

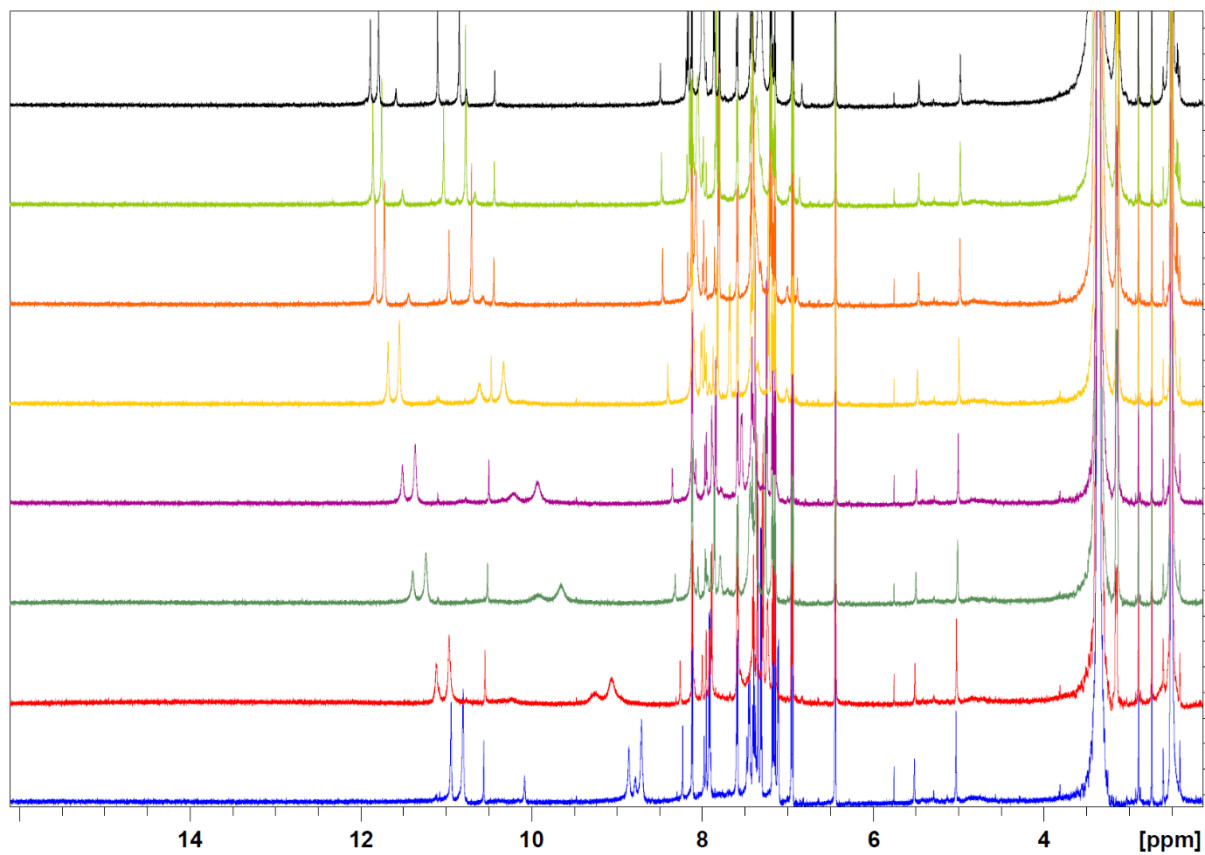

2.12  $^1\text{H}$  NMR spectra (700.1 MHz) of a mixture of receptors CzU-BB; 1,3-diindolylurea; 1,3-dicarbazolylurea + TBA-benzoate

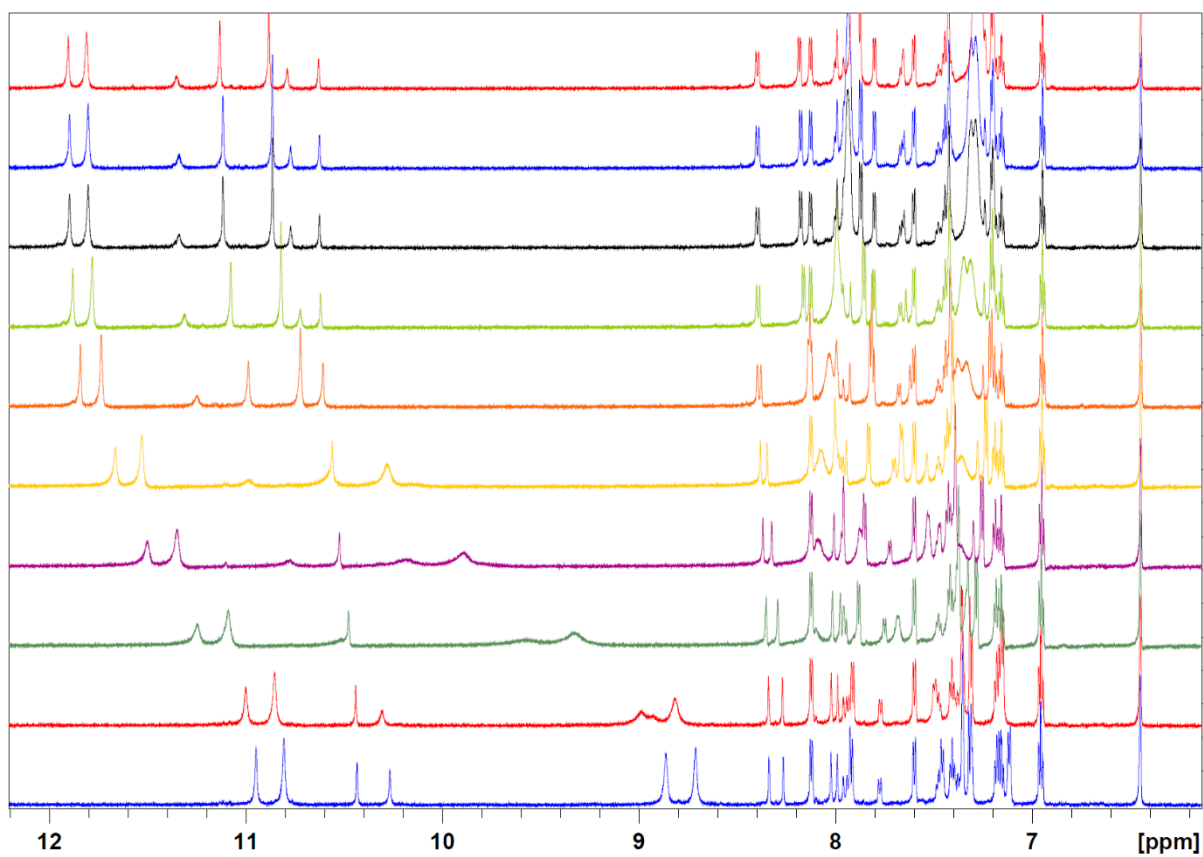

2.13  $^1\text{H}$  NMR spectra (700.1 MHz) of a mixture of receptors CzU-NeP; 1,3-diindolylurea; 1,3-dicarbazolylurea + TBA-formate

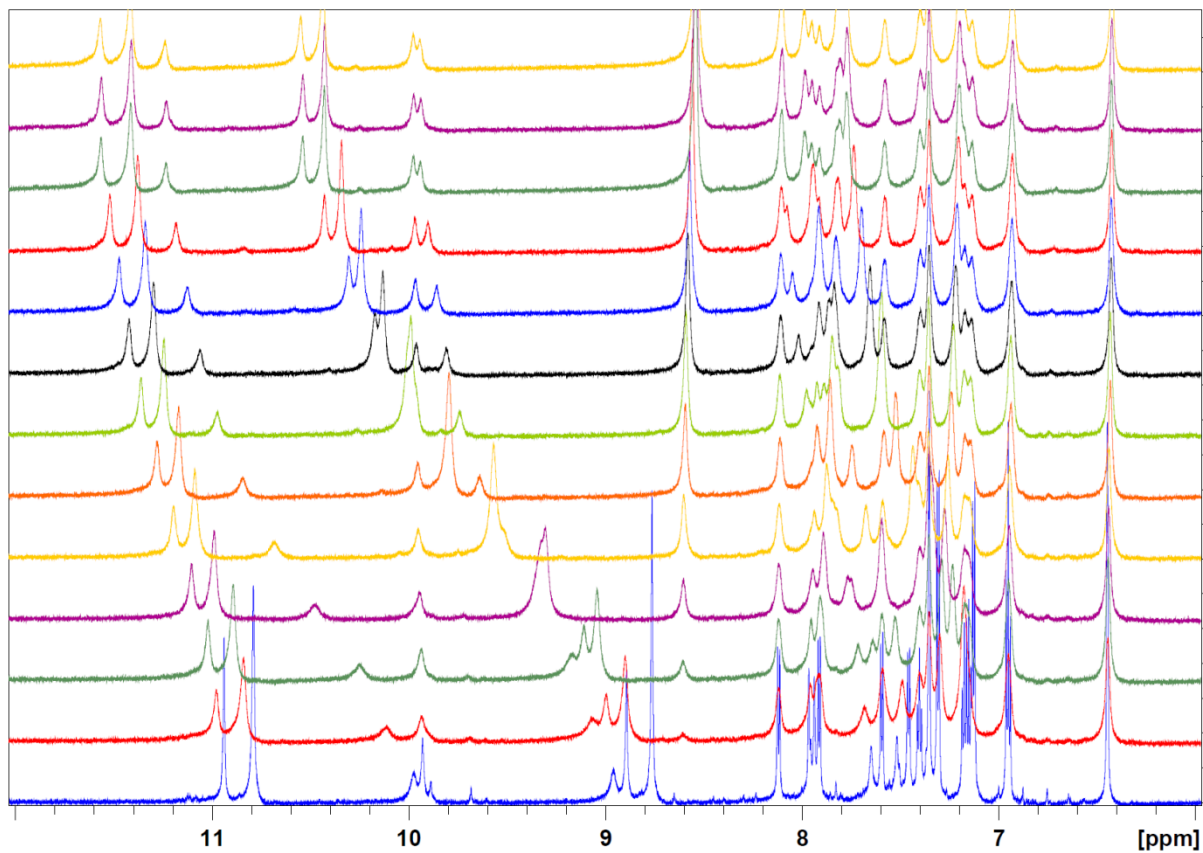

2.14  $^1\text{H}$  NMR spectra (700.1 MHz) of a mixture of receptors Cz-Gly-NeP; 1,3-diindolylurea; 1,3-dicarbazolylurea + TBA-formate

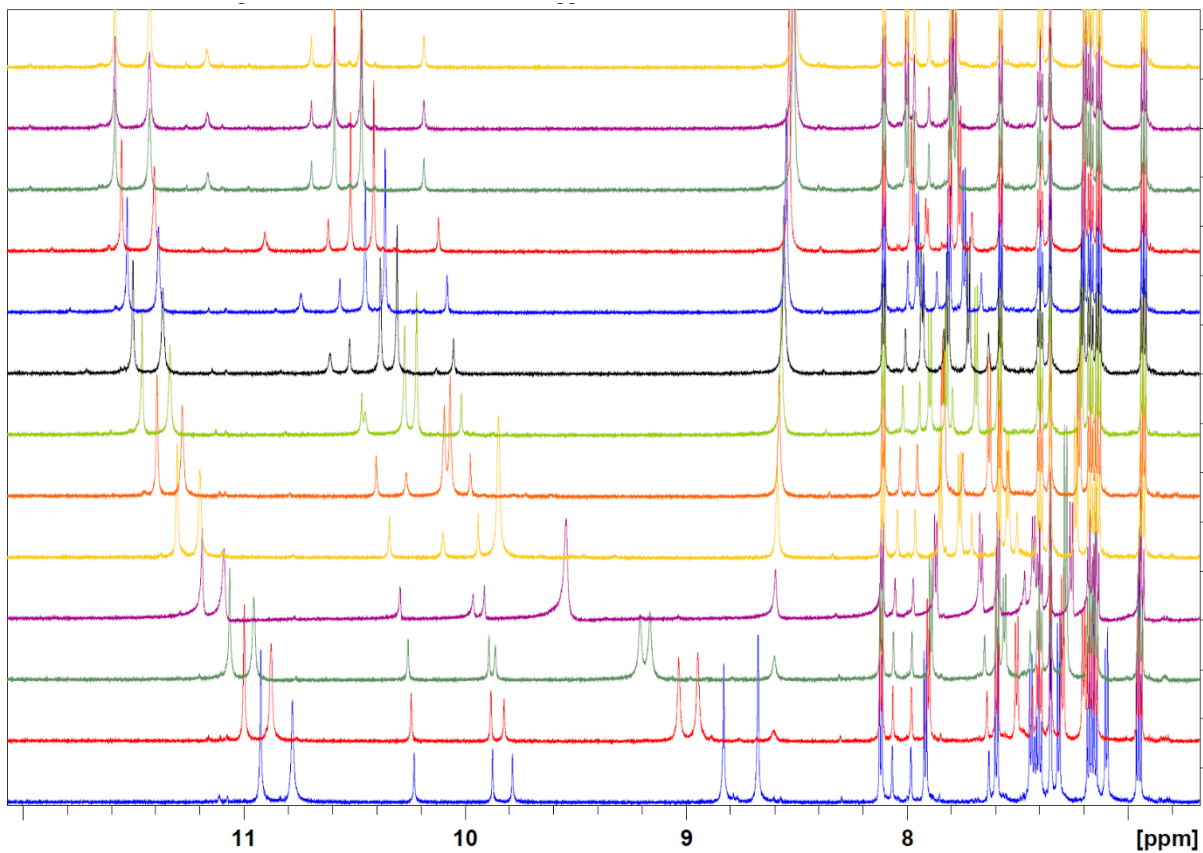



2.15  $^1\text{H}$  NMR spectra (700.1 MHz) of a mixture of receptors CzU-Py; 1,3-diindolylurea; 1,3-dicarbazolylurea + TBA-formate

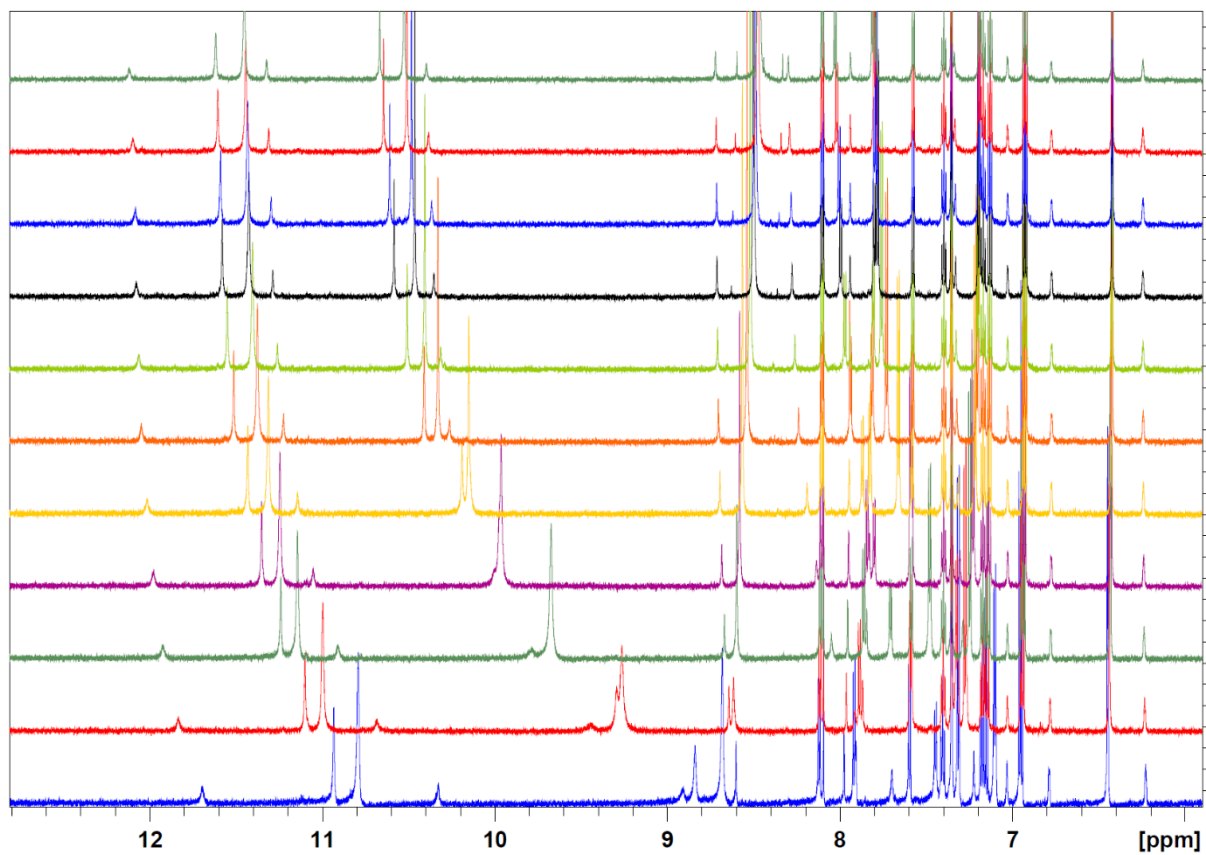

2.16  $^1\text{H}$  NMR spectra (700.1 MHz) of a mixture of receptors CzU-DPM; 1,3-diindolylurea; 1,3-dicarbazolyurea + TBA-formate

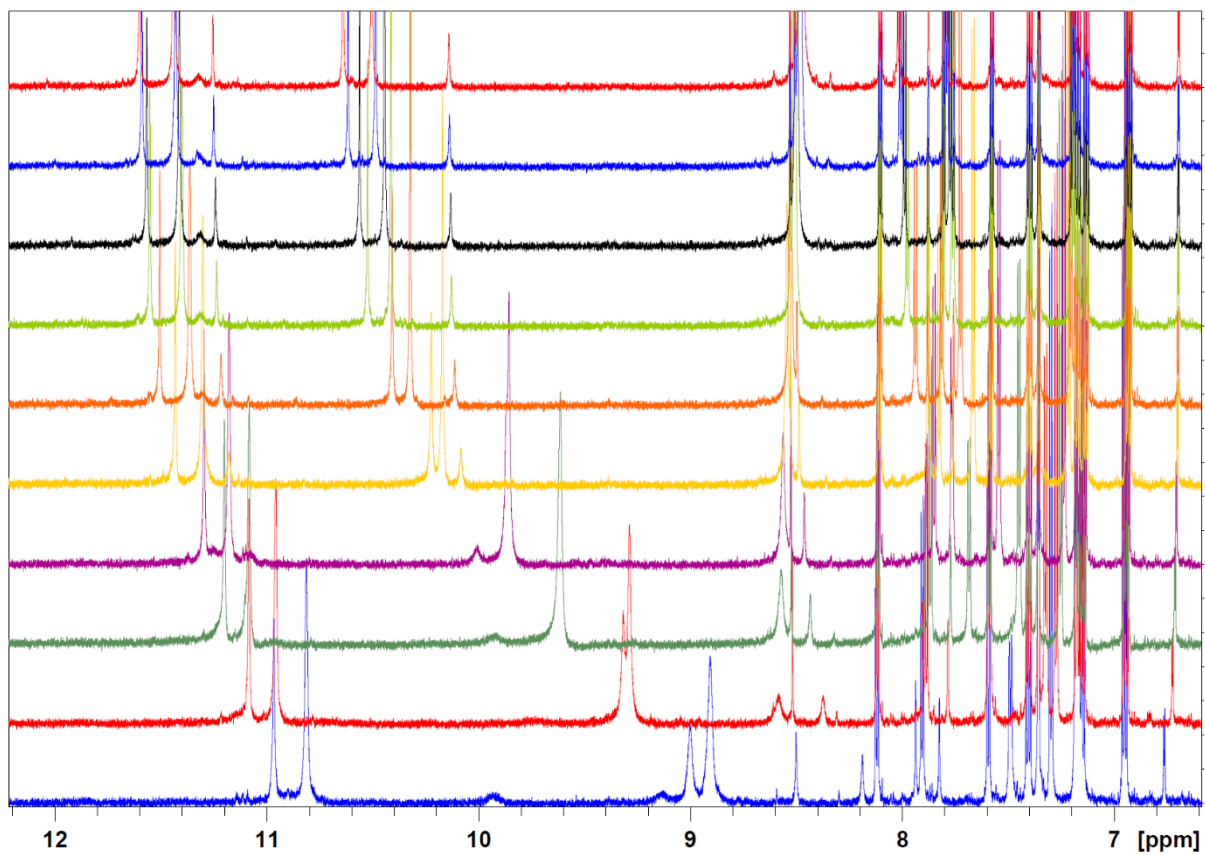

2.17  $^1\text{H}$  NMR spectra (700.1 MHz) of a mixture of receptors CzU-BA; 1,3-diindolylurea; 1,3-dicarbazolylurea + TBA-formate

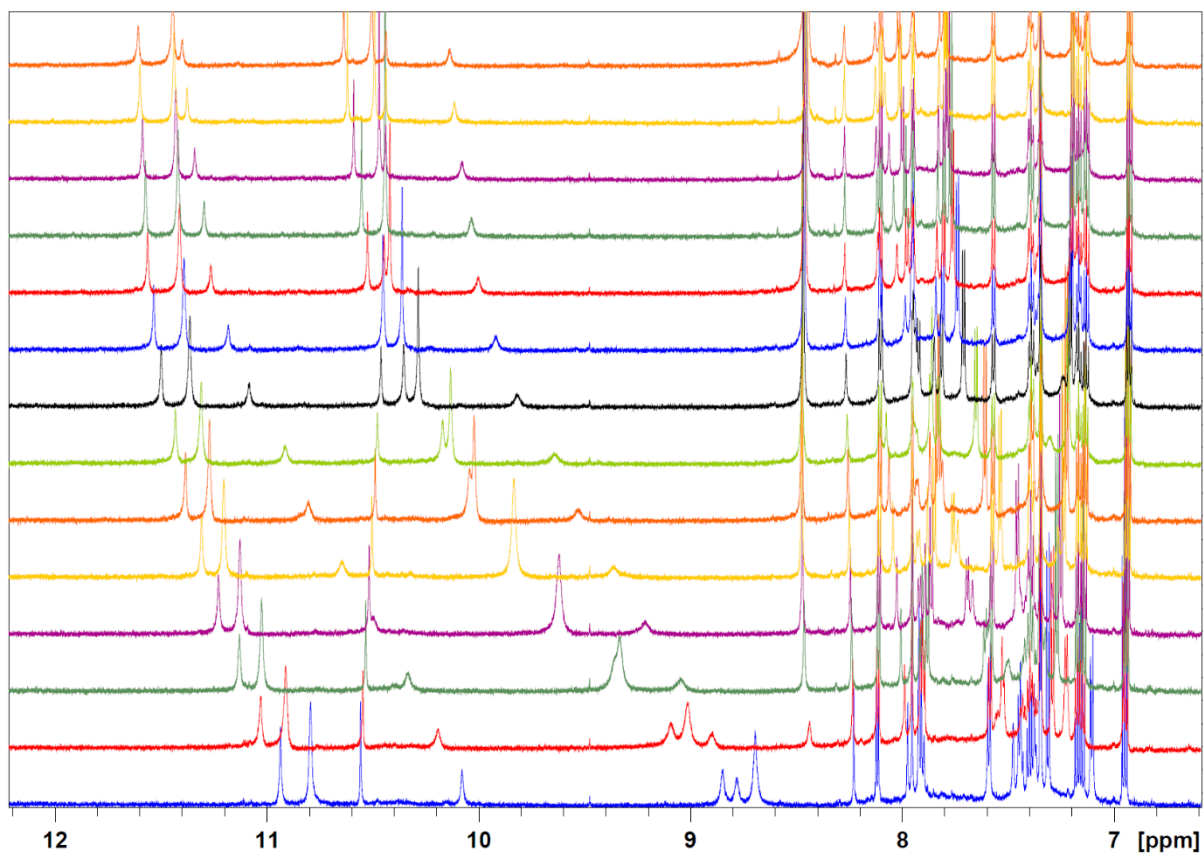

2.18  $^1\text{H}$  NMR spectra (700.1 MHz) of a mixture of receptors CzU-BB; 1,3-diindolylurea; 1,3-dicarbazolylurea + TBA-formate

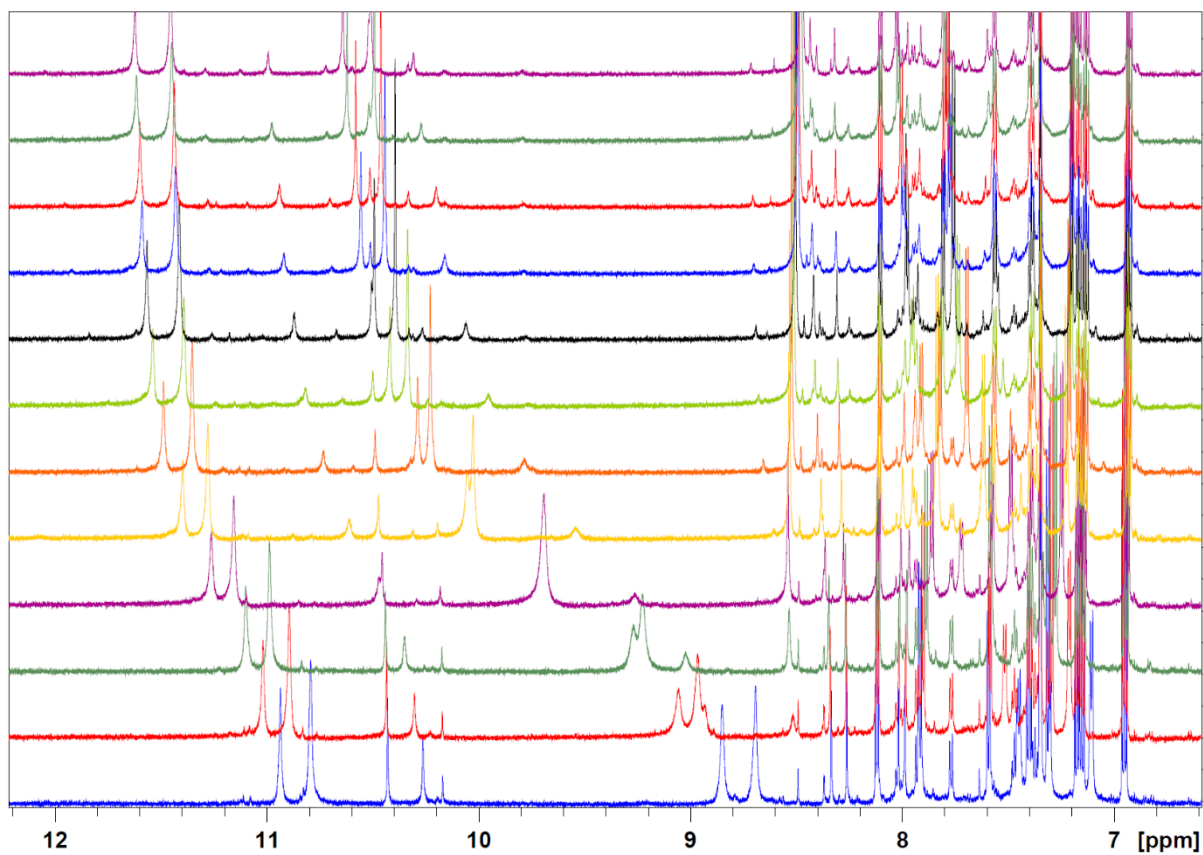

2.19  $^1\text{H}$  NMR spectra (700.1 MHz) of a mixture of receptors CzU-NeP; 1,3-diindolylurea; 1,3-dicarbazolylurea + TBA-lactate

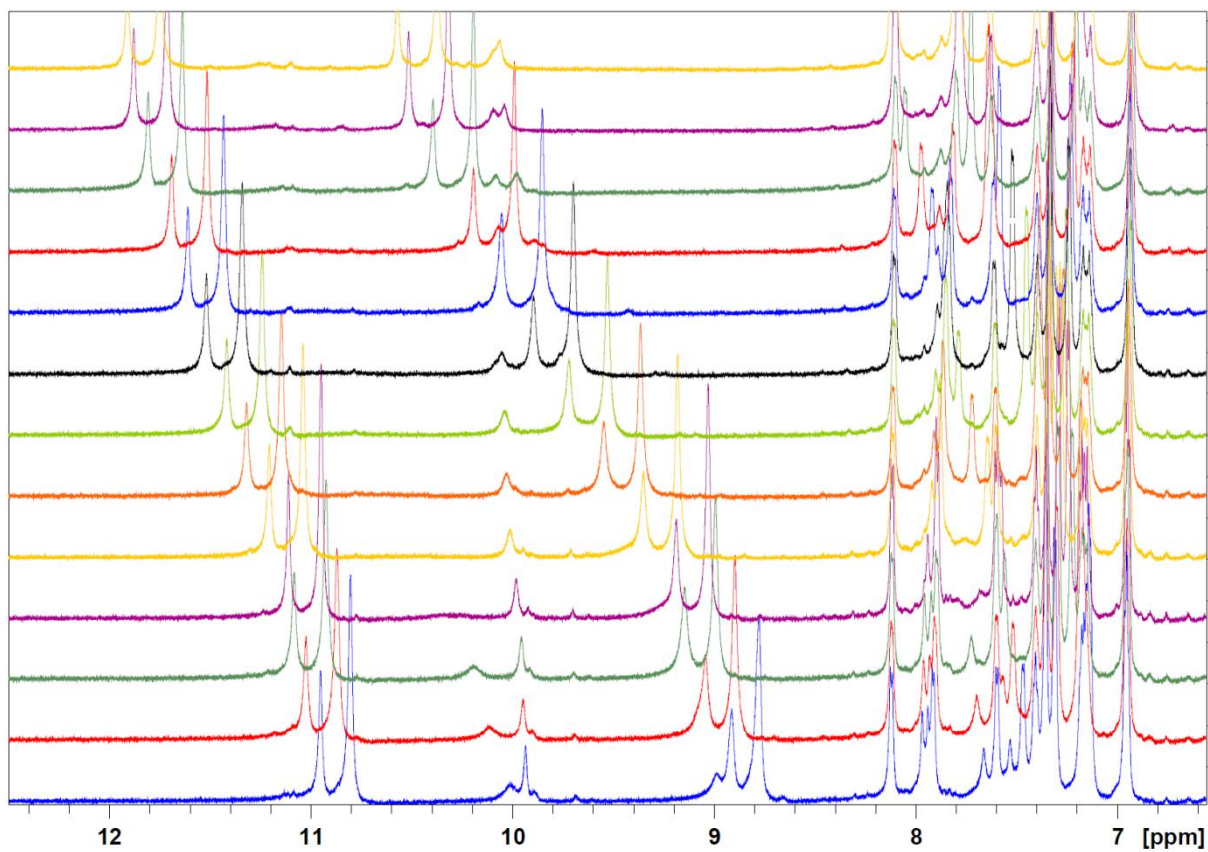

2.20  $^1\text{H}$  NMR spectra (700.1 MHz) of a mixture of receptors Cz-Gly-NeP; 1,3-diindolylurea; 1,3-dicarbazolylurea + TBA-lactate

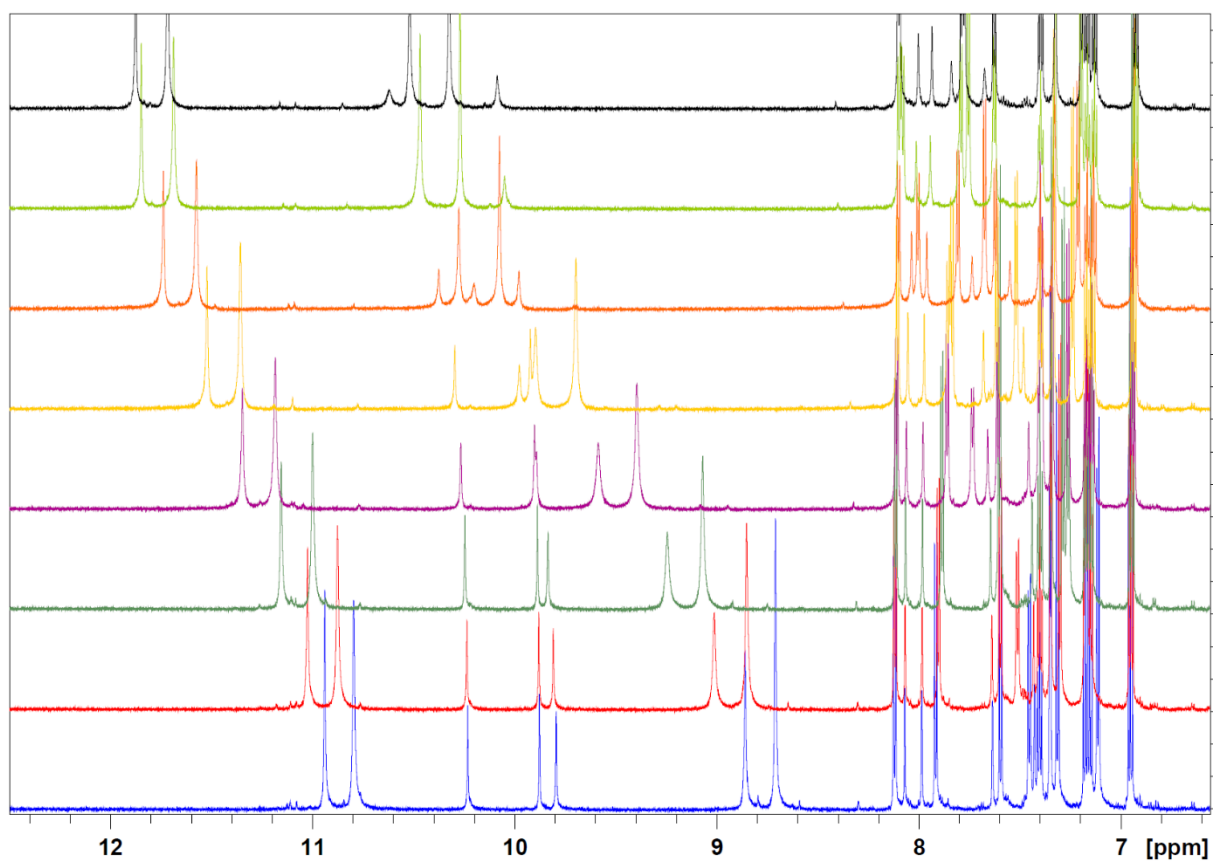

2.21  $^1\text{H}$  NMR spectra (700.1 MHz) of a mixture of receptors CzU-Py; 1,3-diindolylurea; 1,3-dicarbazolylurea + TBA-lactate

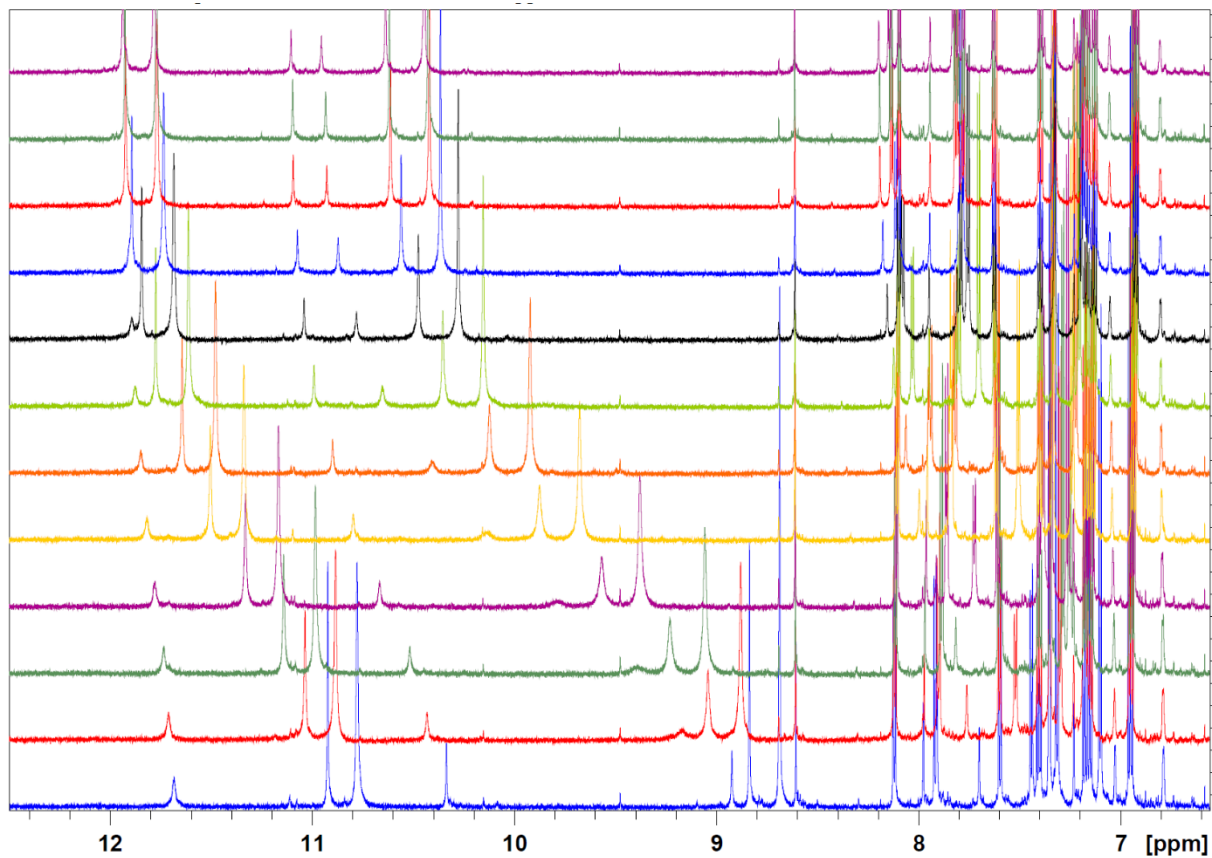

2.22  $^1\text{H}$  NMR spectra (700.1 MHz) of a mixture of receptors CzU-DPM; 1,3-diindolylurea; 1,3-dicarbazolylurea + TBA-lactate

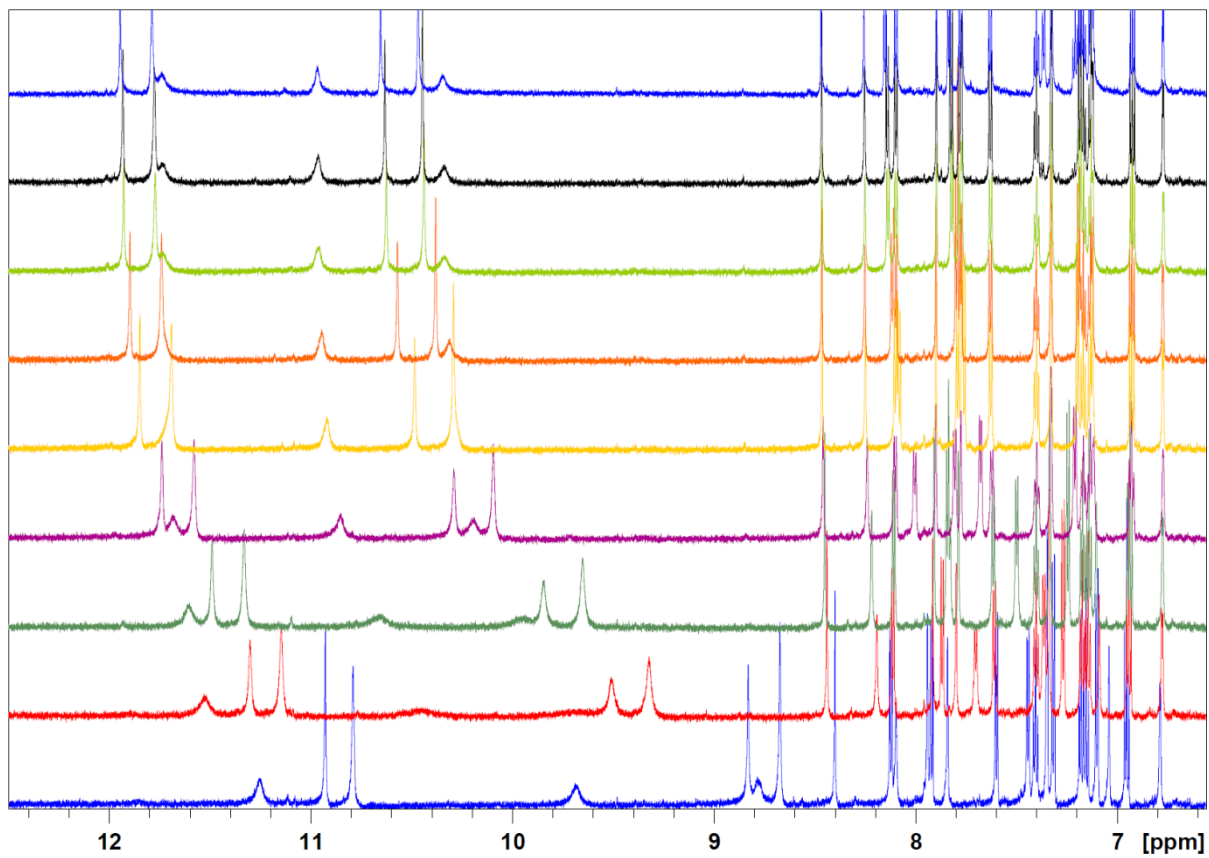



2.23  $^1\text{H}$  NMR spectra (700.1 MHz) of a mixture of receptors CzU-BA; 1,3-diindolylurea; 1,3-dicarbazolylurea + TBA-lactate

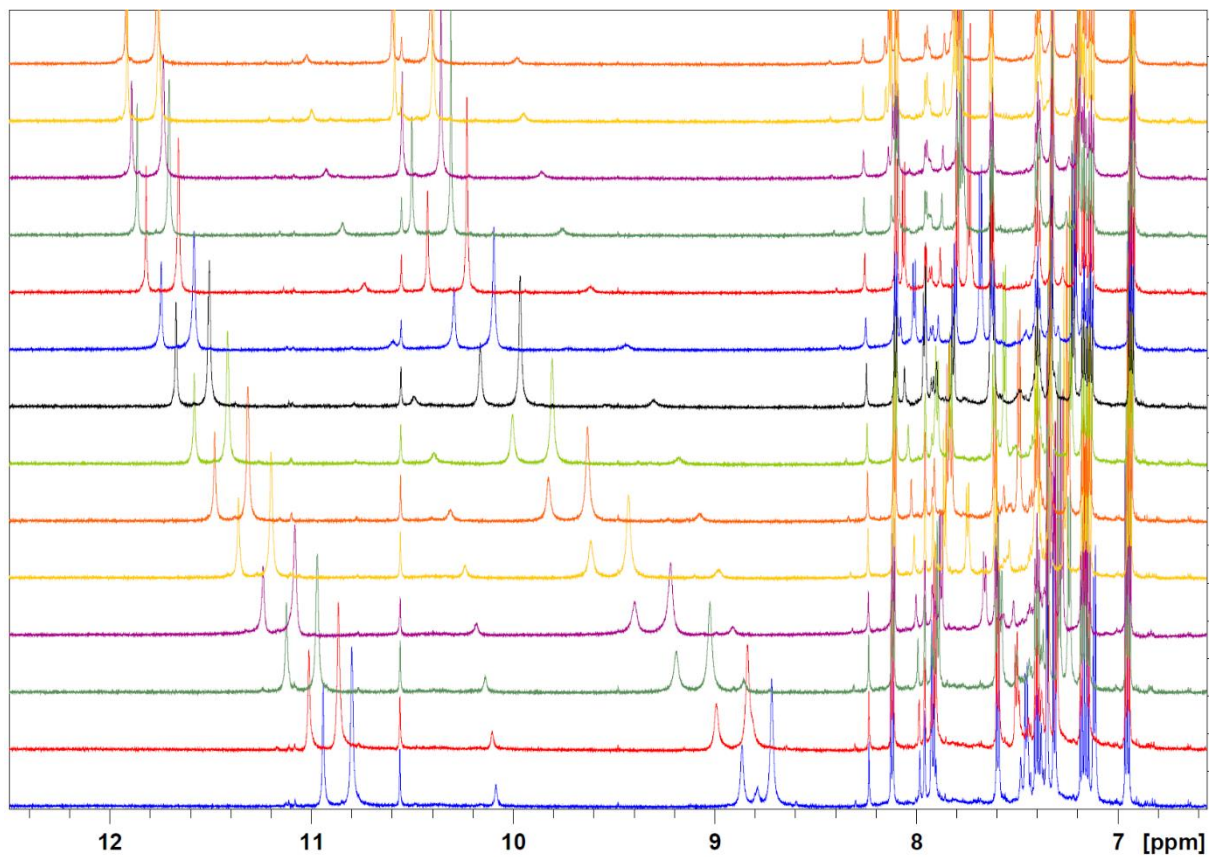

2.24  $^1\text{H}$  NMR spectra (700.1 MHz) of a mixture of receptors CzU-BB; 1,3-diindolylurea; 1,3-dicarbazolylurea + TBA-lactate

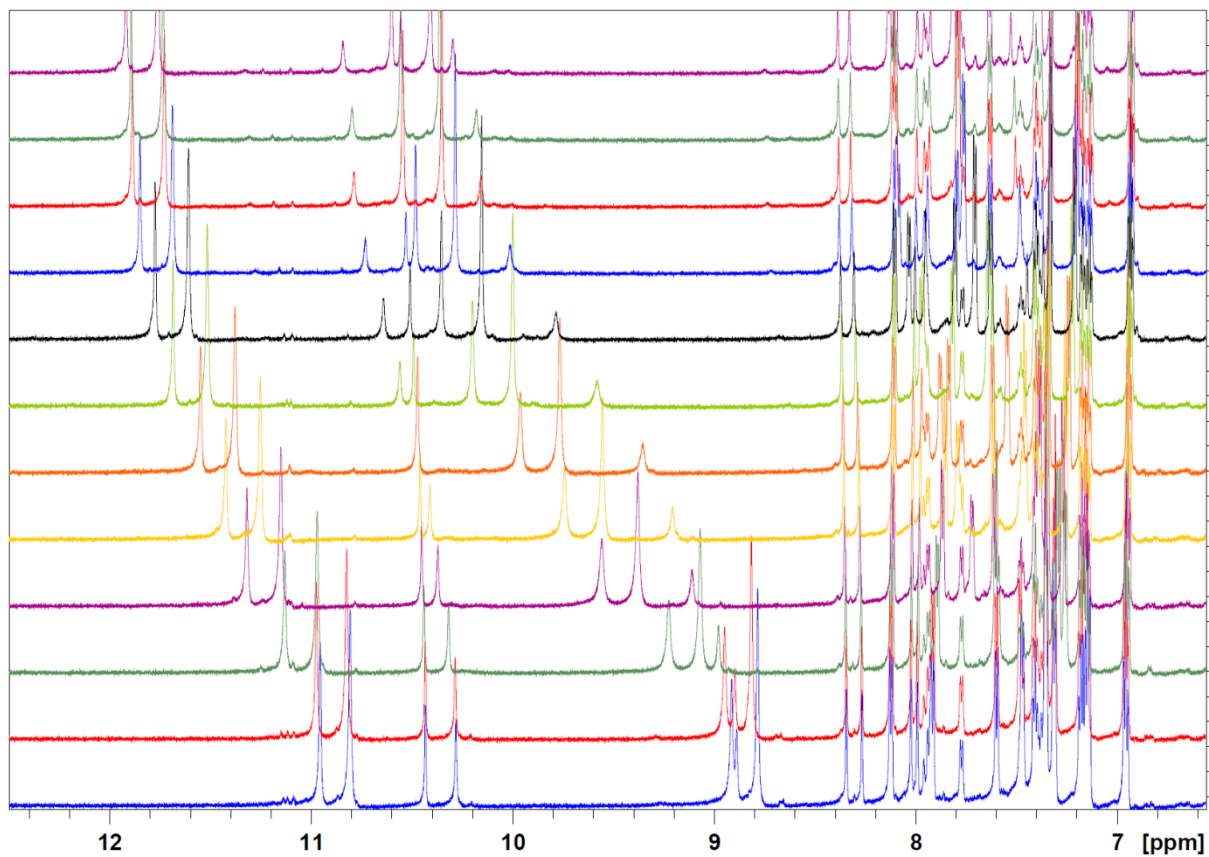

2.25  $^1\text{H}$  NMR spectra (700.1 MHz) of a mixture of receptors CzU-NeP; 1,3-diindolylurea; 1,3-dicarbazolylurea + TBA-sorbate

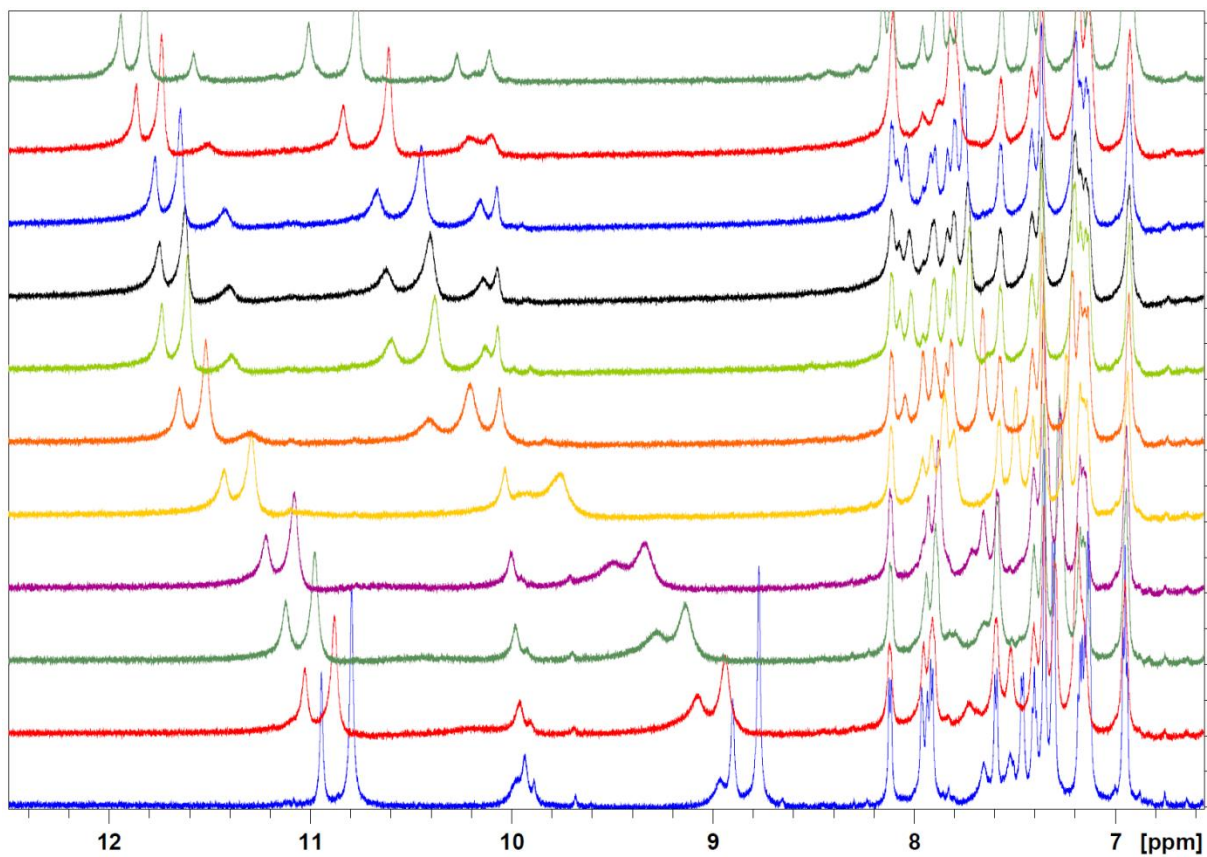

2.26  $^1\text{H}$  NMR spectra (700.1 MHz) of a mixture of receptors Cz-Gly-NeP; 1,3-diindolylurea; 1,3-dicarbazolylurea + TBA-sorbate

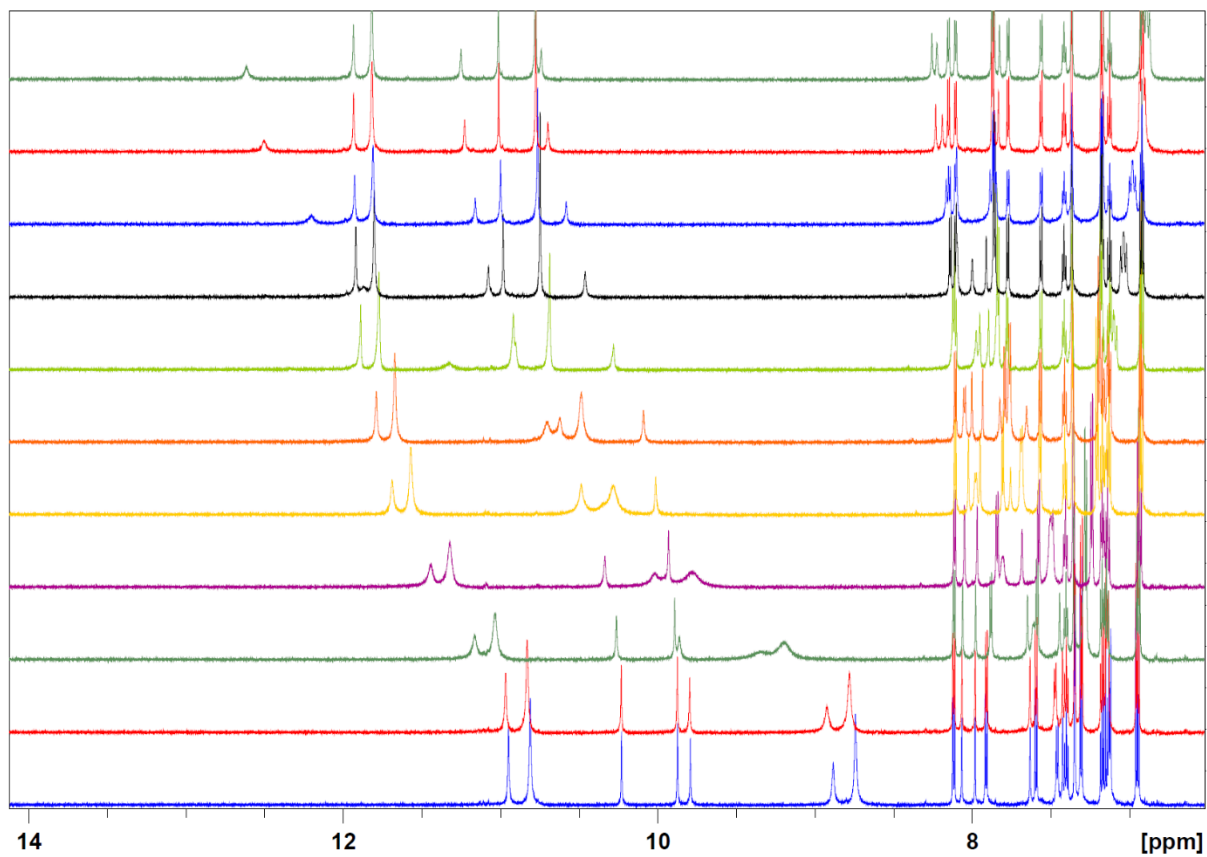

2.27  $^1\text{H}$  NMR spectra (700.1 MHz) of a mixture of receptors CzU-Py; 1,3-diindolylurea; 1,3-dicarbazolylurea + TBA-sorbate

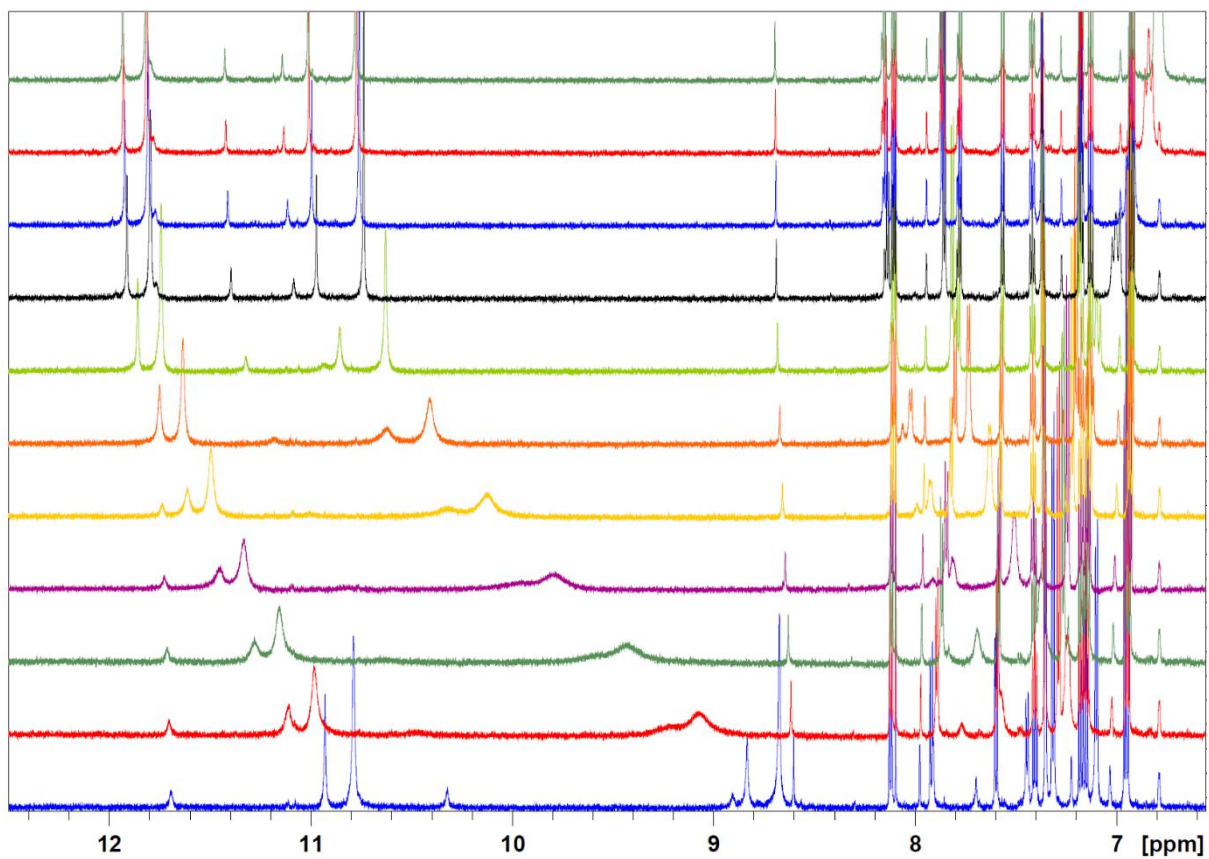

2.28  $^1\text{H}$  NMR spectra (700.1 MHz) of a mixture of receptors CzU-DPM; 1,3-diindolylurea; 1,3-dicarbazolyurea + TBA-sorbate

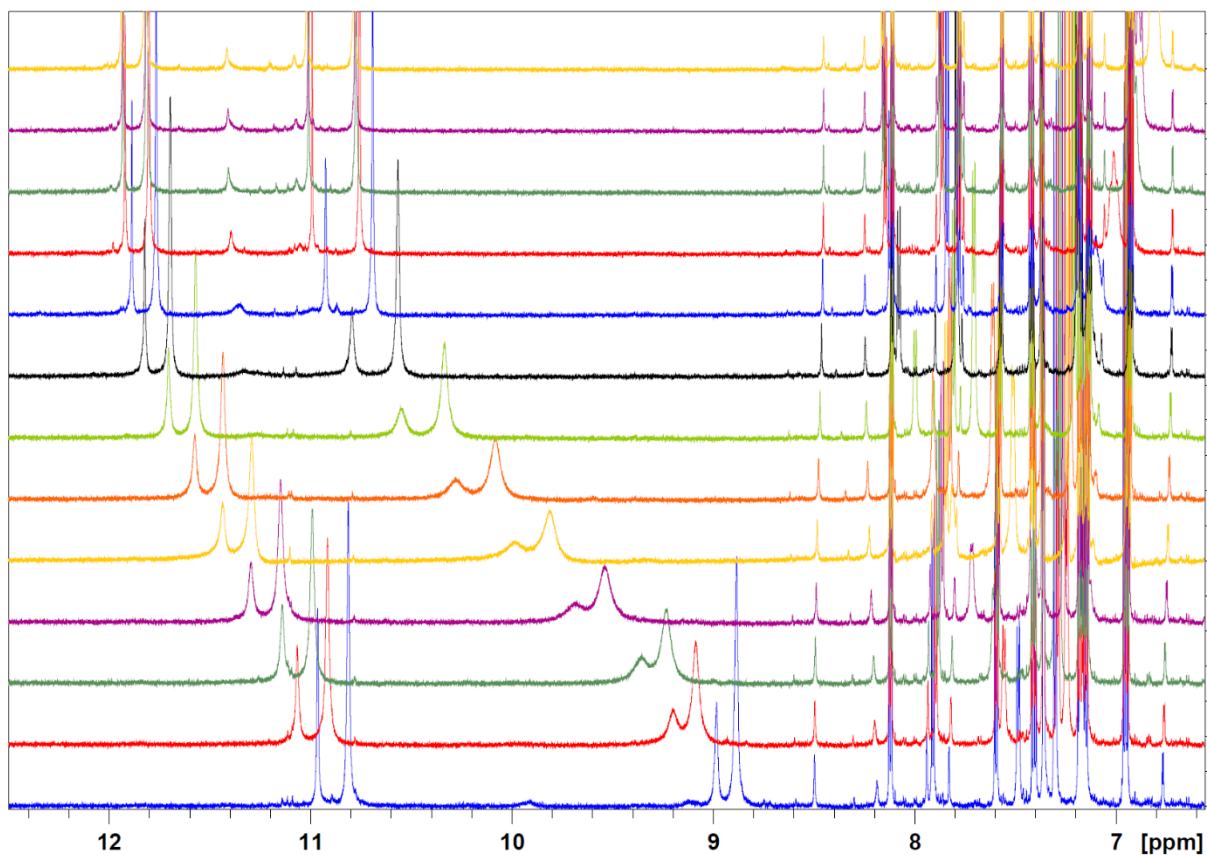

2.29  $^1\text{H}$  NMR spectra (700.1 MHz) of a mixture of receptors CzU-BA; 1,3-diindolylurea; 1,3-dicarbazolylurea + TBA-sorbate

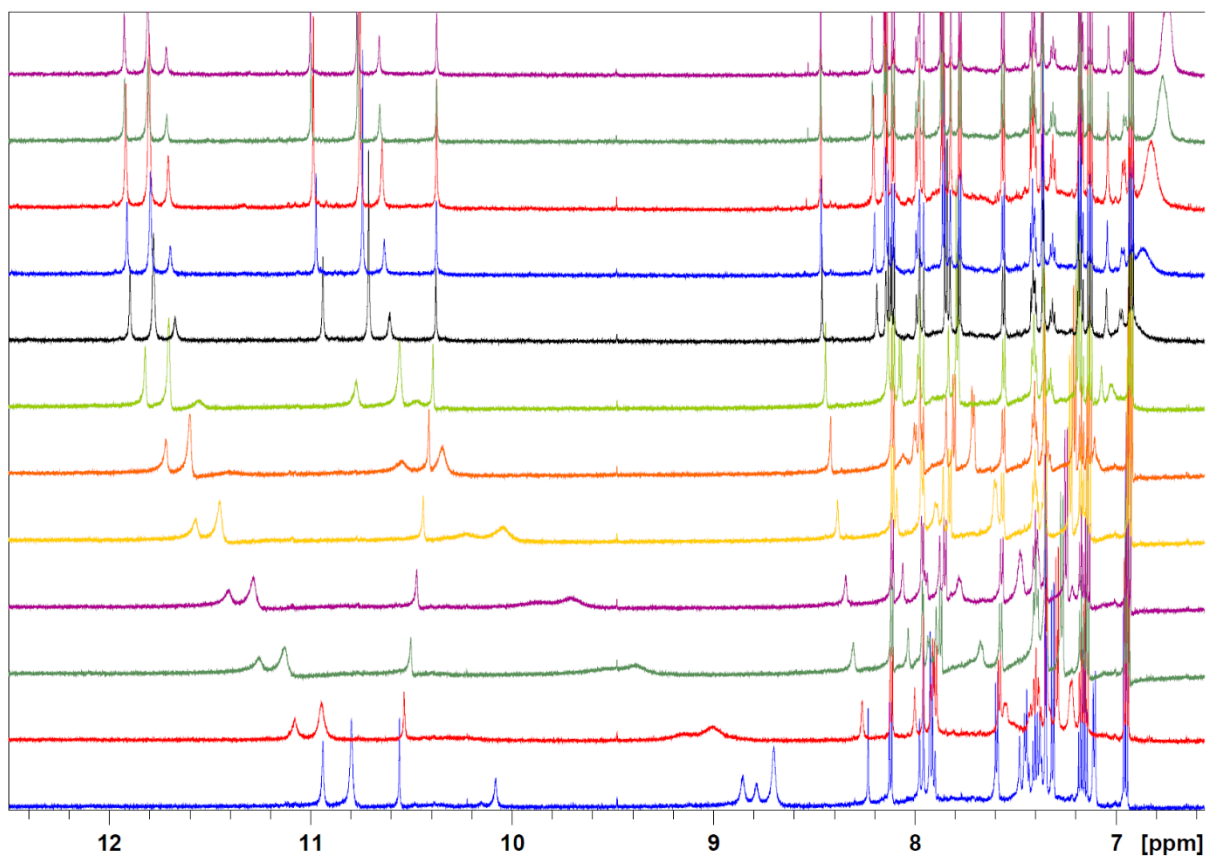

2.30  $^1\text{H}$  NMR spectra (700.1 MHz) of a mixture of receptors CzU-BB; 1,3-diindolylurea; 1,3-dicarbazolylurea + TBA-sorbate

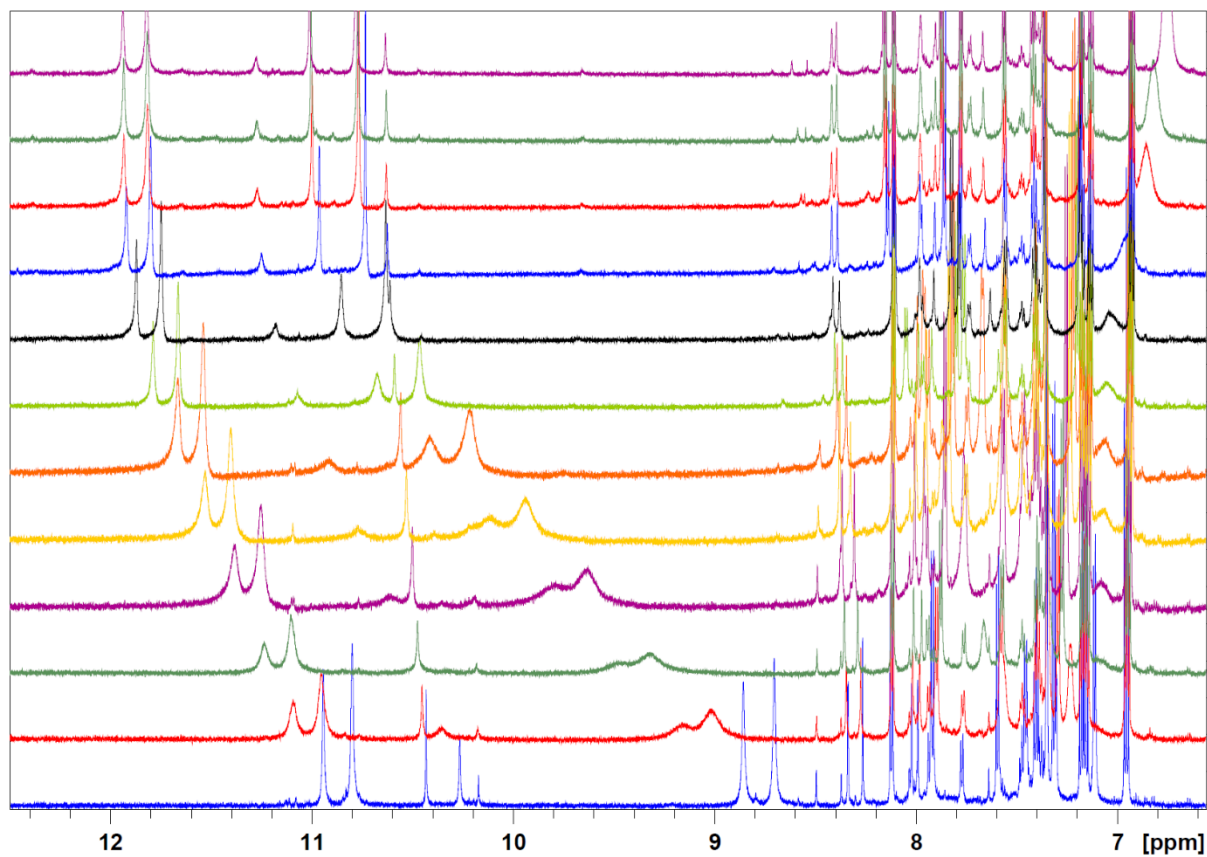



### 3. Computational investigation of binding

#### 3.1 Used computational parameters

The computational investigation was carried out on DFT level using Turbomole v.6.5 (geometry optimization) and COSMO-RS method<sup>6-8</sup> (using COSMOTerm2021<sup>9</sup>) was applied to study the conformer stability in solution). The Becke-Perdew functional, TZVP basis set, and the following wave function convergence criteria - max difference  $10^{-6}$  Hartree, geometry convergence: max gradient  $|dE/dxyz| 10^{-3}$  Hartree Bohr<sup>-1</sup> - were applied for the geometry optimization. The conformer stability was investigated using COSMOTerm 2021 with the parametrization BP\_TZVP\_21.

Frequency calculations were carried out on the DFT optimized geometries of the structures of the determined most stable conformers to test whether the geometry optimization reached a true minimum. For the majority of the studied structures, either no negative frequencies were detected, or the minimum negative frequency value observed remained higher than -20 (the exceptions were the acetate complexes of CzU-NEP (-40) and CzU-DPM (-43).

The conformer stability was investigated in the solvent mixture of 99.5% DMSO and 0.5% H<sub>2</sub>O. Images of most stable conformers and respective Gibbs free energies in 99.5%DMSO-0.5% H<sub>2</sub>O are presented in section 3.2. Coordinates of computational geometries for the most stable conformers are presented in SI section 3.3.

#### 3.2 Images of the geometries of most stable conformers (determined using COSMO-RS, solvent: 99.5% DMSO with 0.5% water). COSMOTerm 2021, parametrization BP\_TZVP\_21.

##### 3.2.1 Lowest energy conformation of receptor CzU-NeP

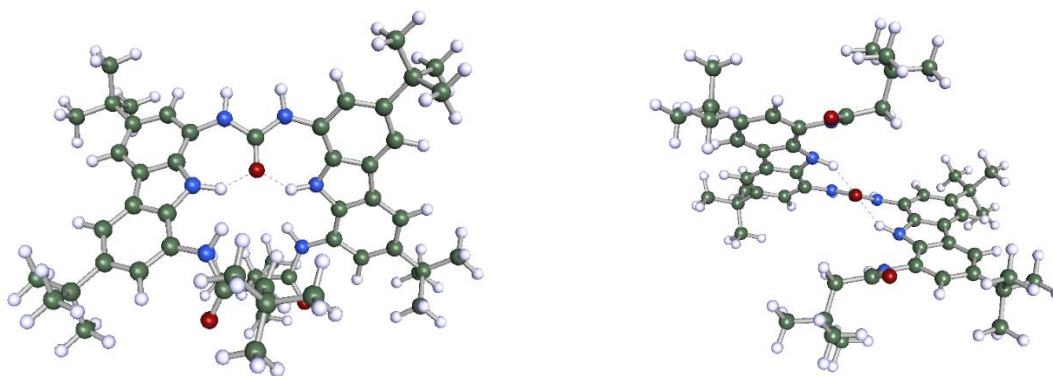

G = -1643073.61922 kcal/mol

### 3.2.2 Lowest energy conformation of receptor CzU-NeP with acetate anion

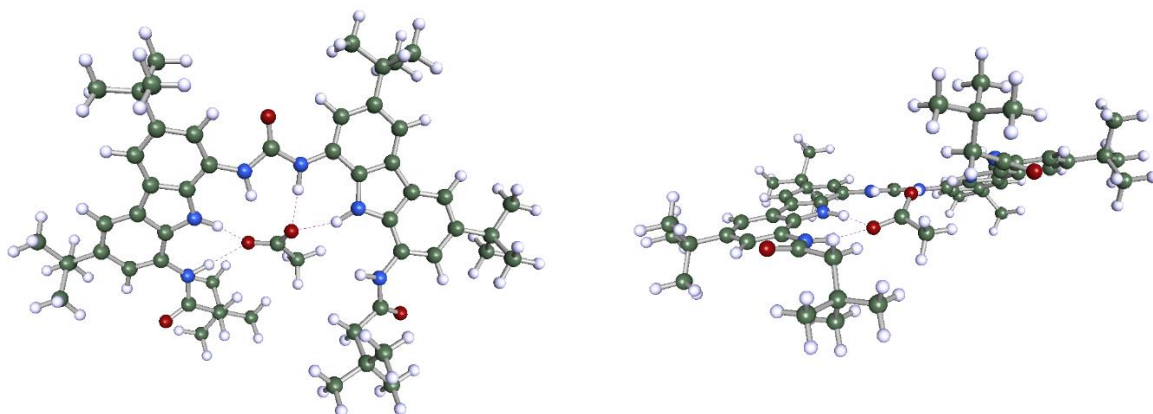

G = -1786625.33635 kcal/mol

### 3.2.3 Lowest energy conformation of receptor CzU-NeP with benzoate anion

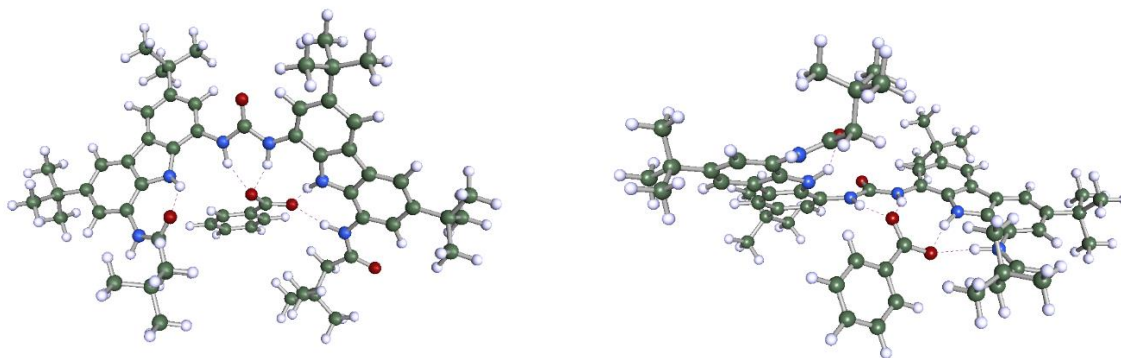

G = -1906988.68199 kcal/mol

### 3.2.4 Lowest energy conformation of receptor CzU-NeP with formate anion

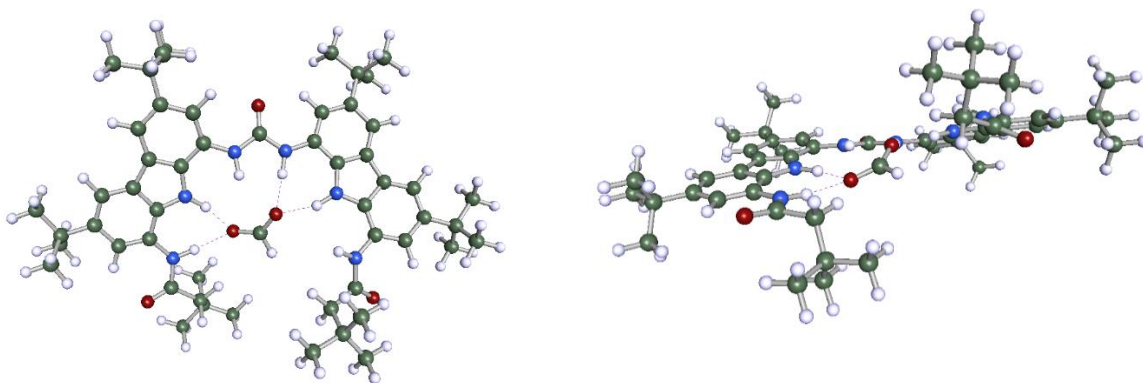

G = -1761943.71261 kcal/mol

### 3.2.5 Lowest energy conformation of receptor CzU-NeP with lactate anion

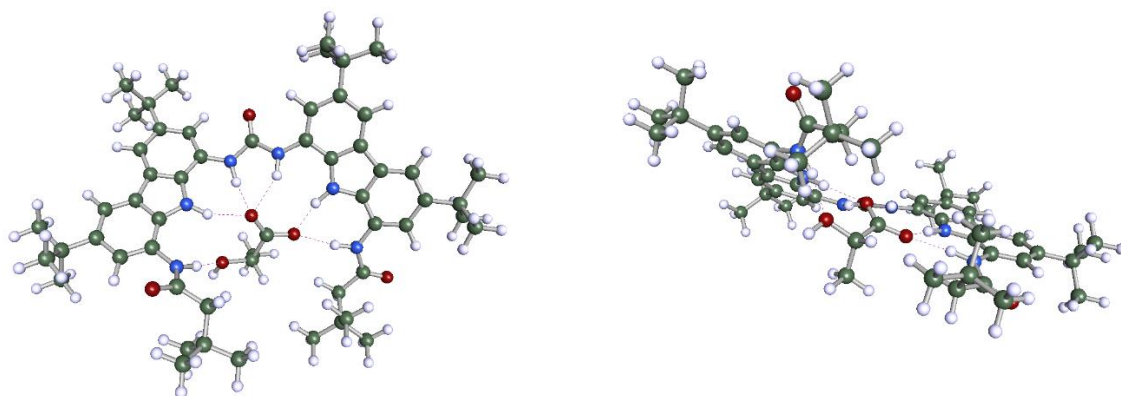

G = -1858530.57751kcal/mol

**3.2.6** Lowest energy conformation of receptor CzU-NeP with sorbate anion

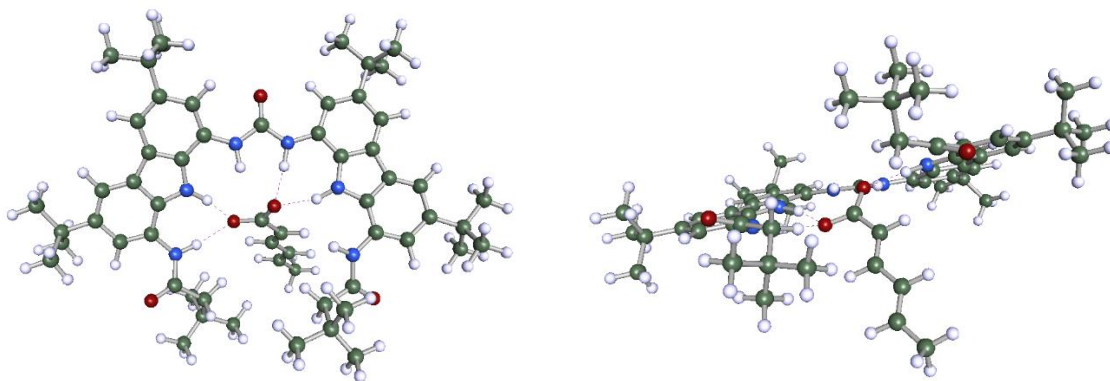

G = -1883801.67397 kcal/mol

**3.2.7** Lowest energy conformation of receptor Cz-Gly-NeP

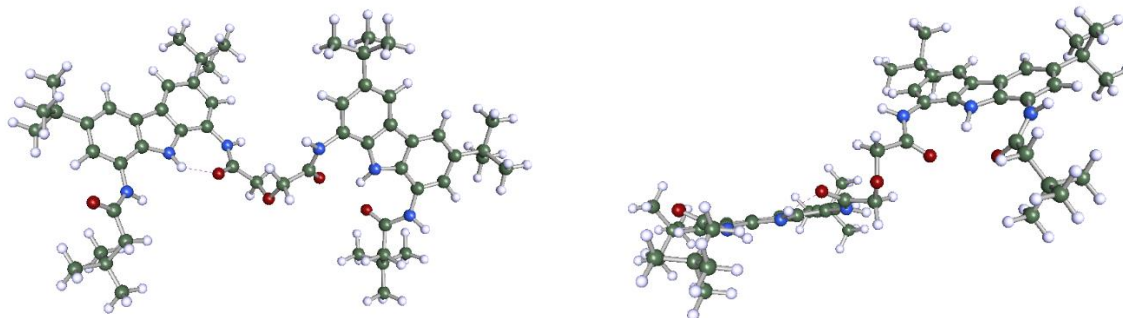

G = -1810796.99183 kcal/mol

**3.2.8** Lowest energy conformation of receptor Cz-Gly-NeP with acetate anion

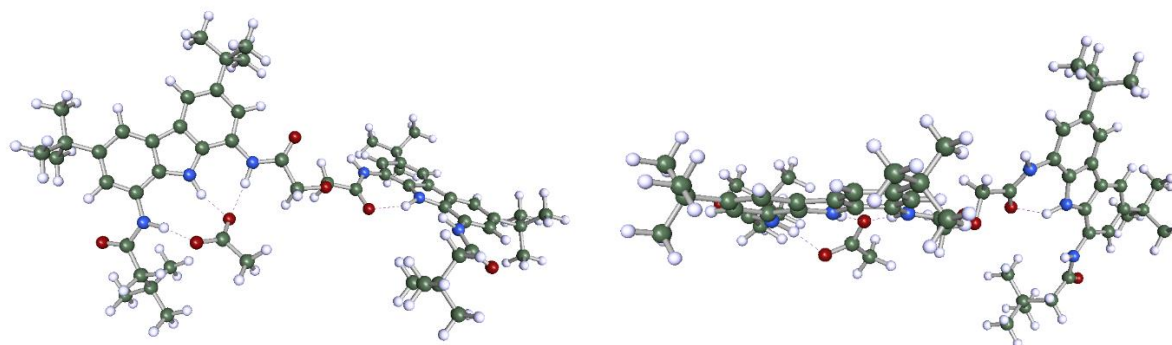

G = -1954346.83059 kcal/mol

**3.2.9** Lowest energy conformation of receptor Cz-Gly-NeP with benzoate anion

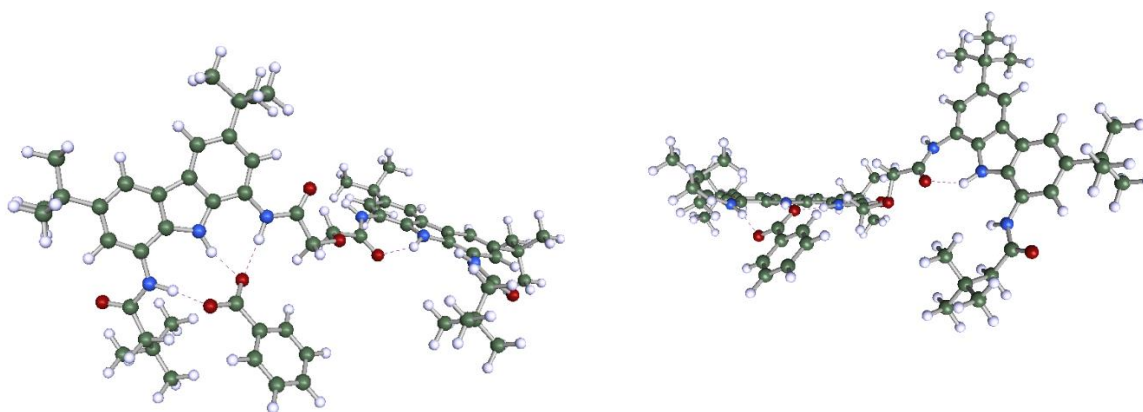

G = -2074709.80141 kcal/mol

**3.2.10** Lowest energy conformation of receptor Cz-Gly-NeP with formate anion

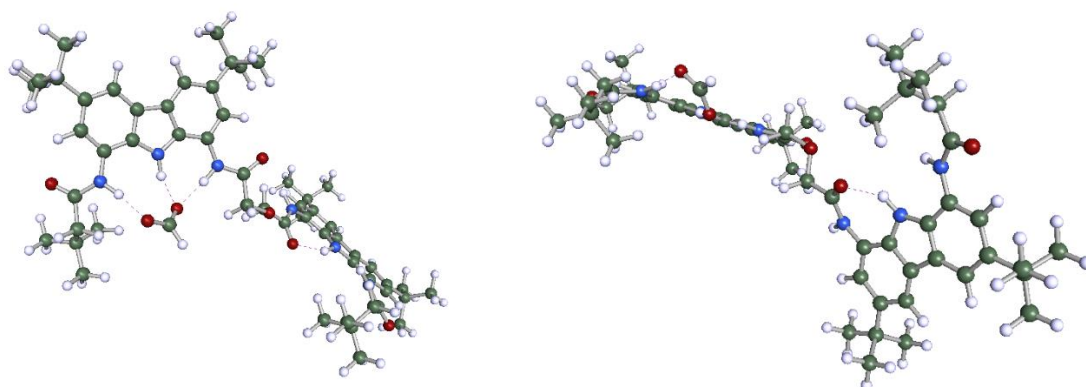

G = -1929664.74222 kcal/mol

**3.2.11** Lowest energy conformation of receptor Cz-Gly-NeP with lactate anion

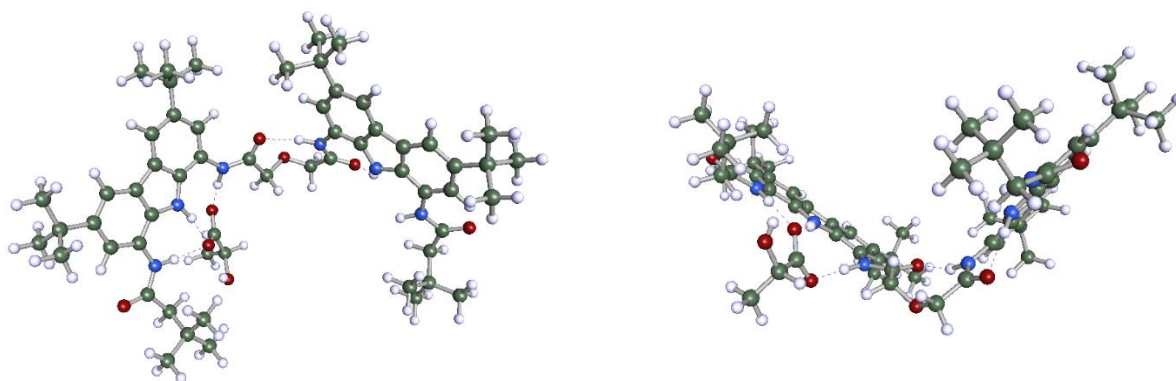

G = -2026255.07778 kcal/mol

**3.2.12** Lowest energy conformation of receptor Cz-Gly-NeP with sorbate anion

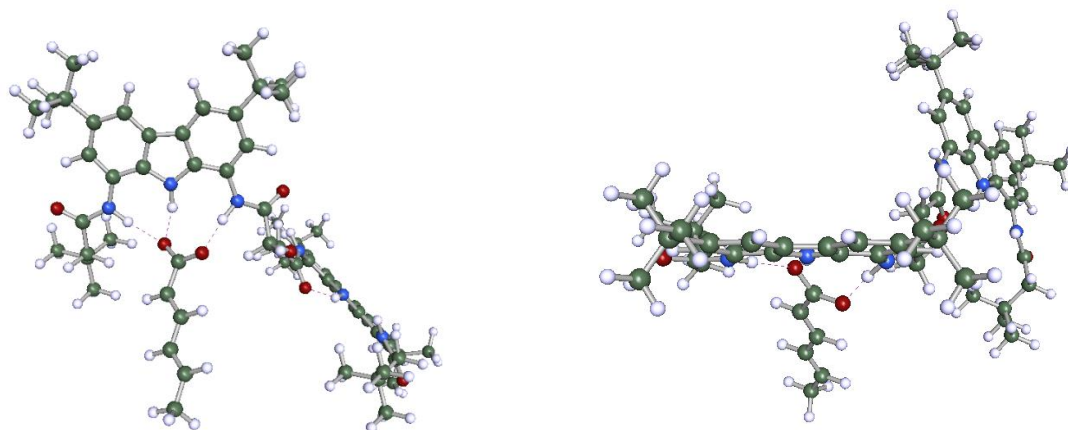

G = -2051526.02421 kcal/mol

**3.2.13** Lowest energy conformation of receptor CzU-Py

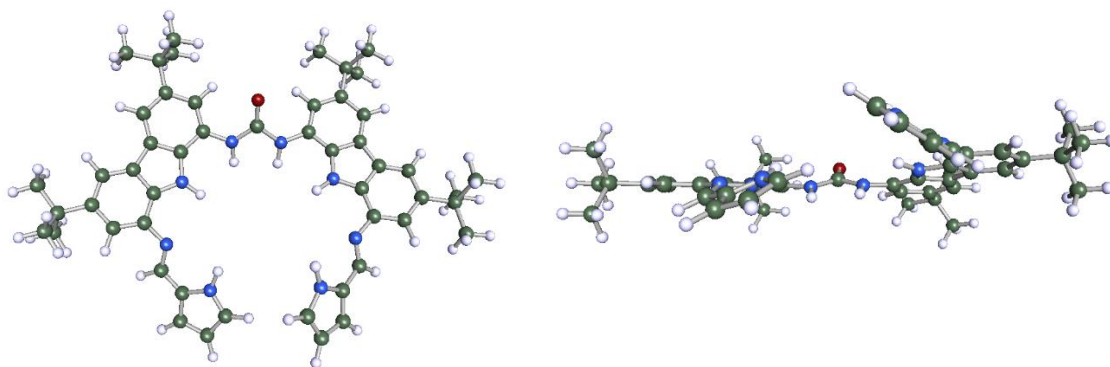

G = -1564185.49168 kcal/mol

**3.2.14** Lowest energy conformation of receptor CzU-Py with acetate anion

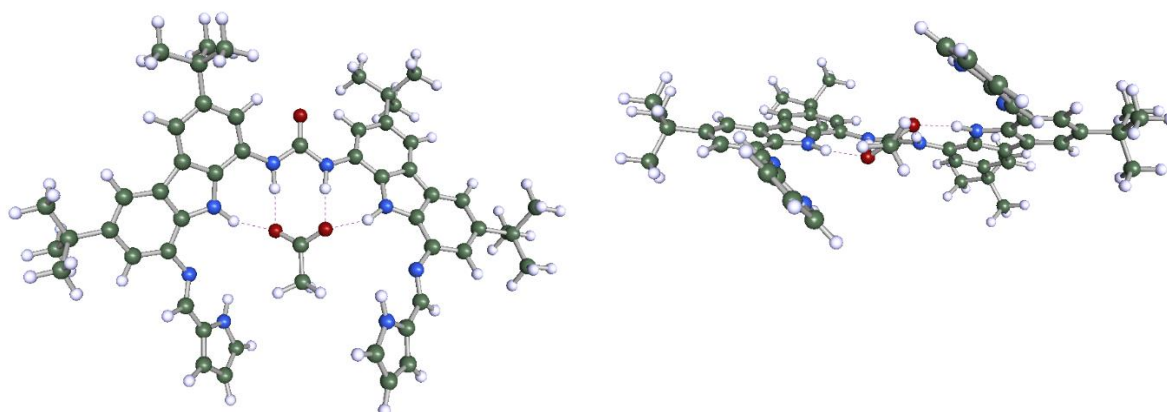

G = -1707738.51842 kcal/mol

**3.2.15** Lowest energy conformation of receptor CzU-Py with benzoate anion

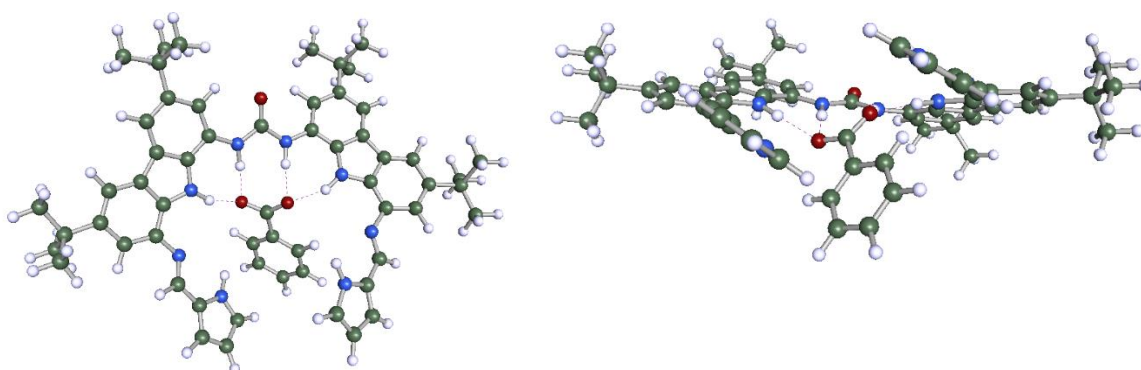

G = -1828098.08974 kcal/mol



**3.2.16** Lowest energy conformation of receptor CzU-Py with formate anion

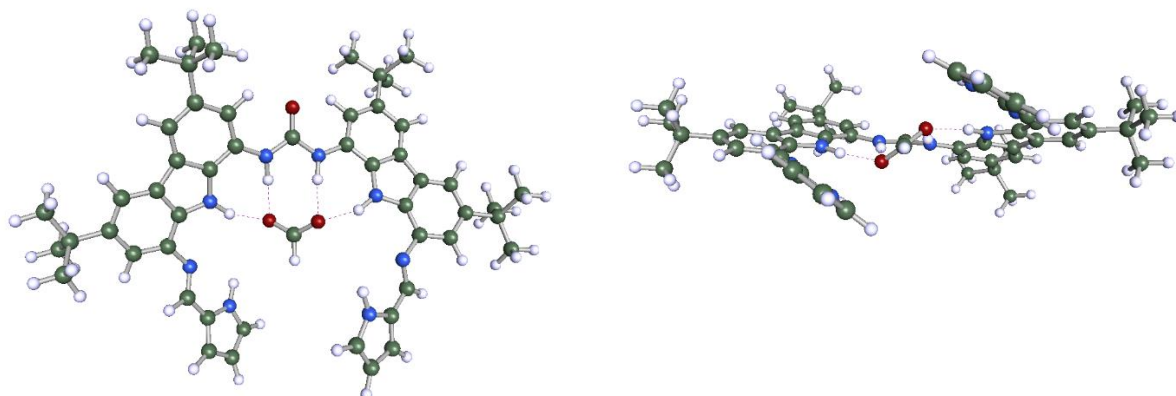

G = -1683055.75883 kcal/mol

**3.2.17** Lowest energy conformation of receptor CzU-Py with lactate anion

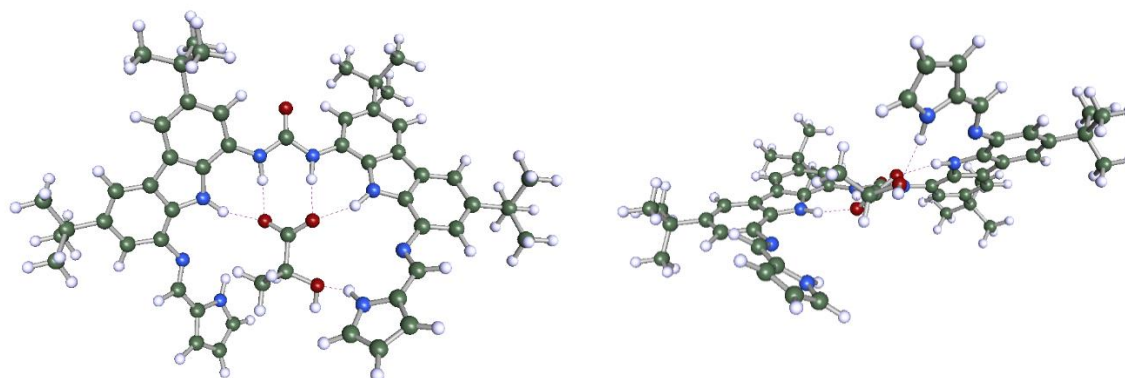

G = -1779642.71785 kcal/mol

**3.2.18** Lowest energy conformation of receptor CzU-Py with sorbate anion

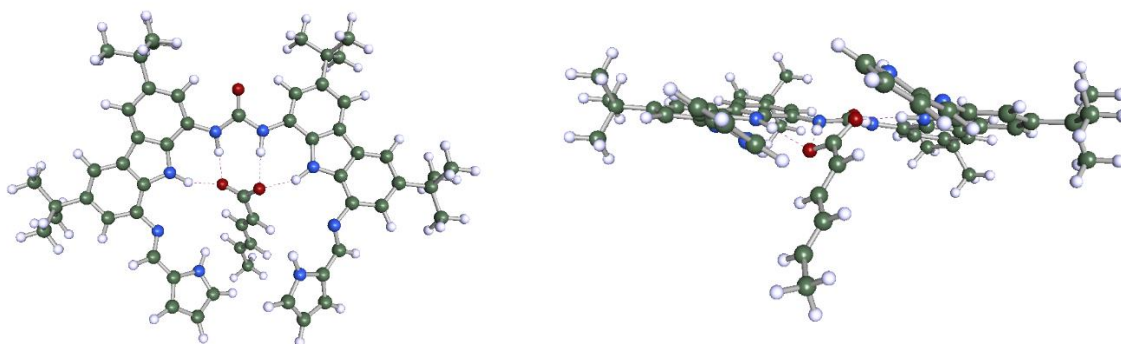

G = -1804914.14324 kcal/mol

**3.2.19** Lowest energy conformation of receptor CzU-DPM

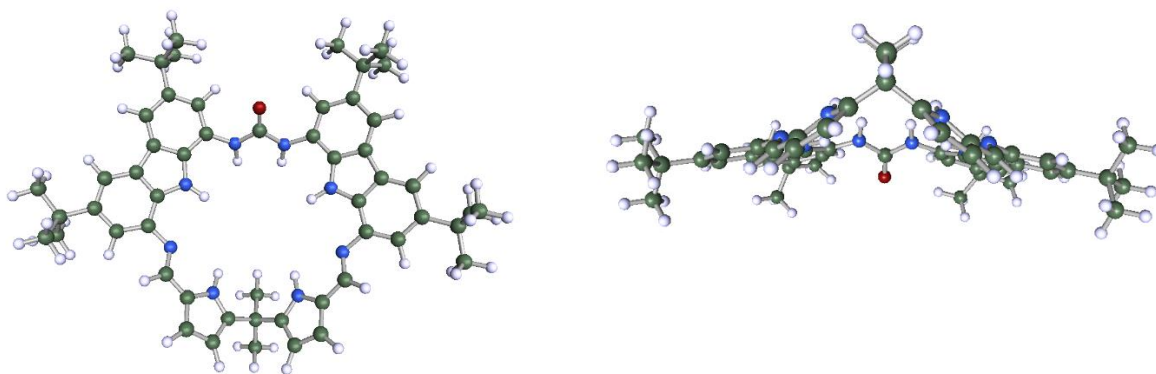

G = -1637465.63173 kcal/mol

**3.2.20** Lowest energy conformation of receptor CzU-DPM with acetate anion

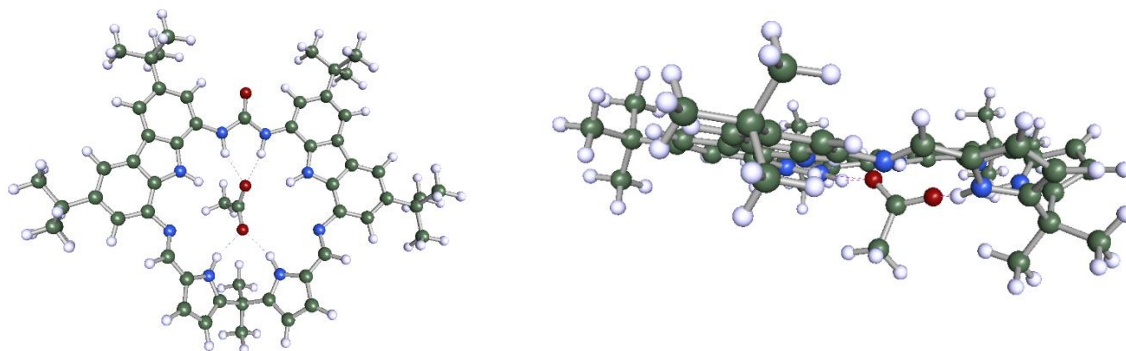

G = -1781015.75558kcal/mol

**3.2.21** Lowest energy conformation of receptor CzU-DPM with benzoate anion

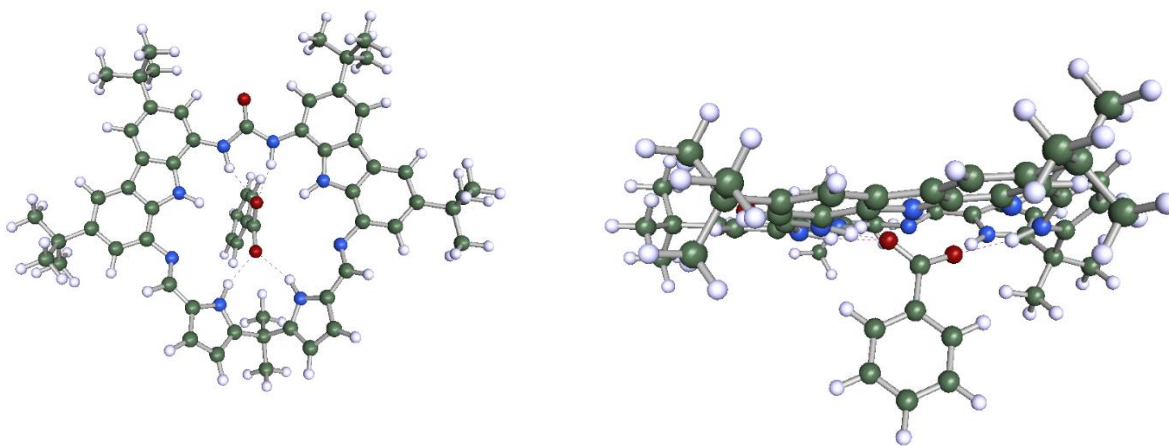

G = -1901377.40925kcal/mol

**3.2.22** Lowest energy conformation of receptor CzU-DPM with formate anion

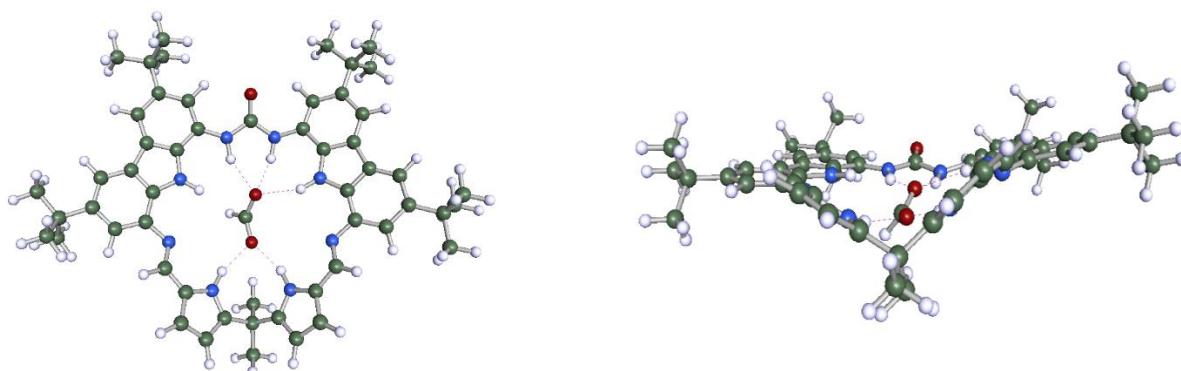

G = -1756333.8839 kcal/mol

**3.2.23** Lowest energy conformation of receptor CzU-DPM with lactate anion

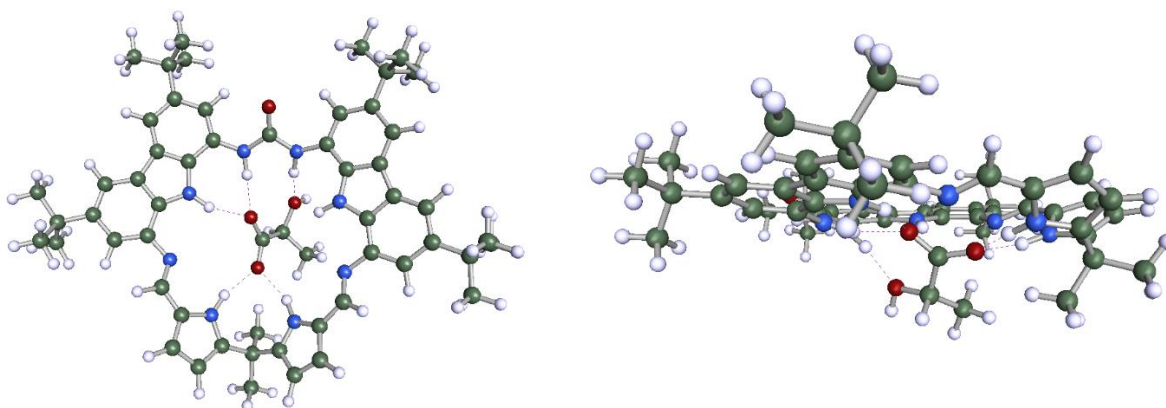

G = -1852920.79124 kcal/mol

**3.2.24** Lowest energy conformation of receptor CzU-DPM with sorbate anion

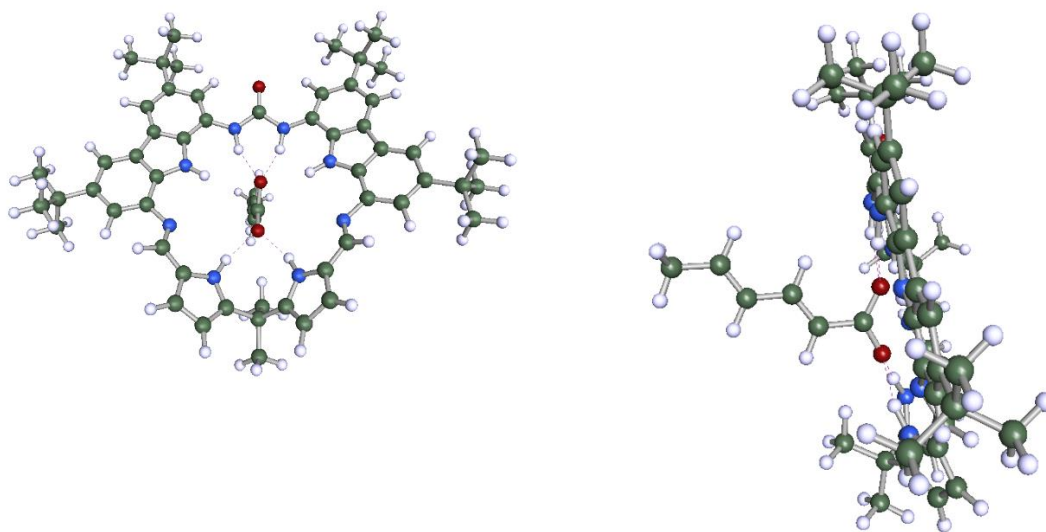

G = -1878193.7422 kcal/mol

**3.2.25** Lowest energy conformation of receptor CzU-BA

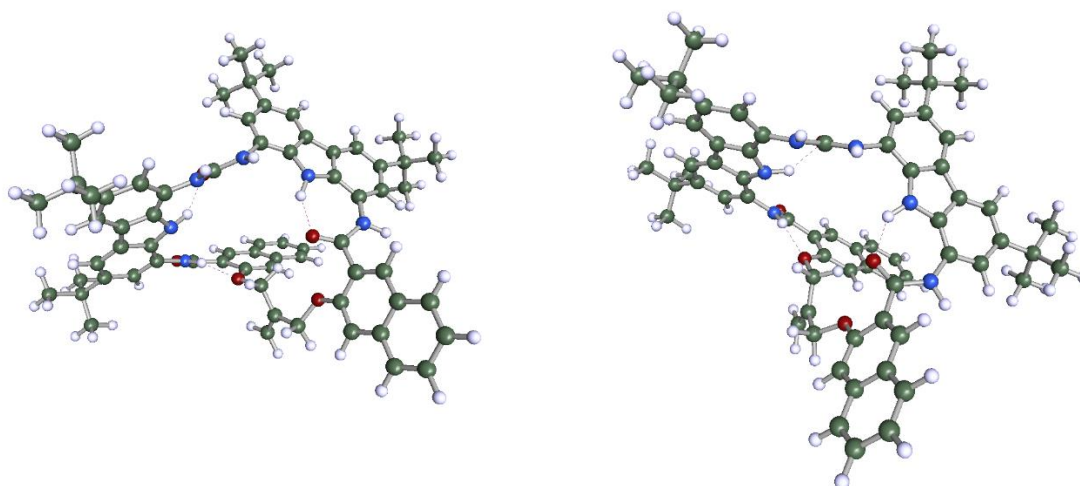

G = -2070891.58366 kcal/mol

**3.2.26** Lowest energy conformation of receptor CzU-BA with acetate anion

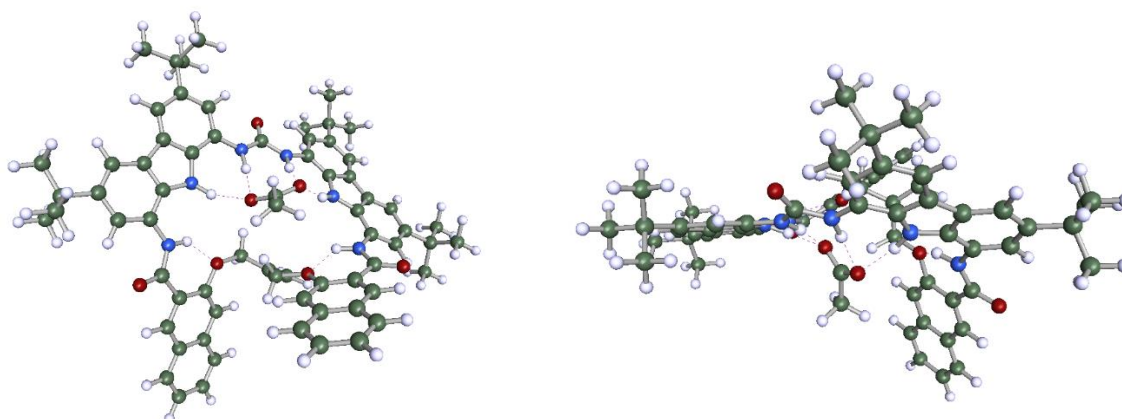

G = -2214440.89509 kcal/mol

**3.2.27** Lowest energy conformation of receptor CzU-BA with benzoate anion

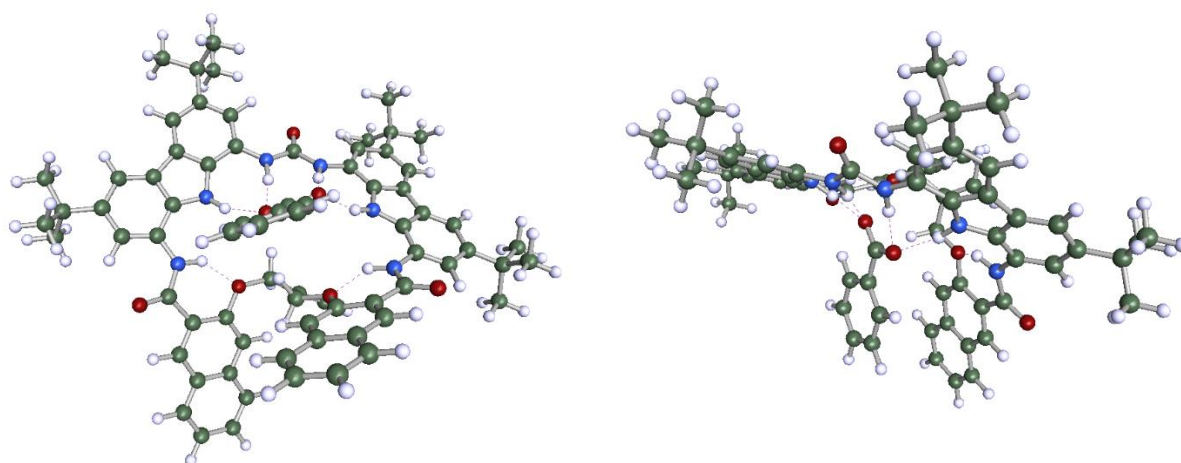

G = -2334802.53378 kcal/mol

**3.2.28** Lowest energy conformation of receptor CzU-BA with formate anion

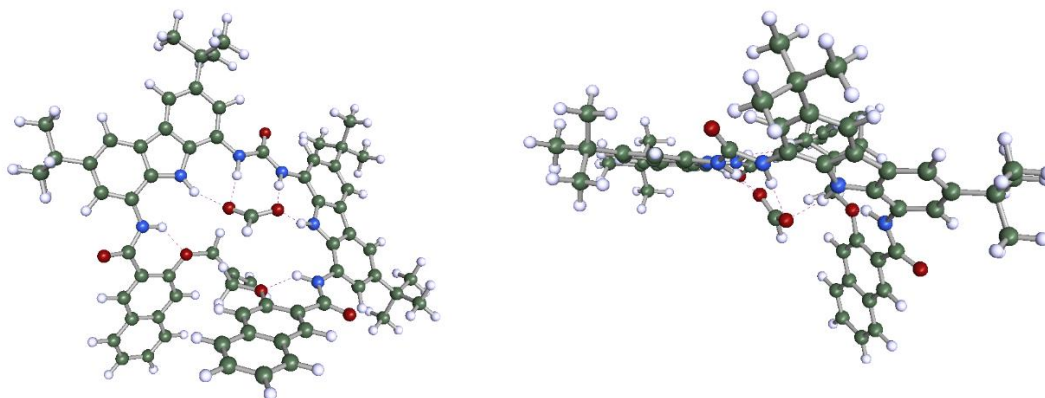

G = -2189759.17786 kcal/mol

**3.2.29** Lowest energy conformation of receptor CzU-BA with lactate anion

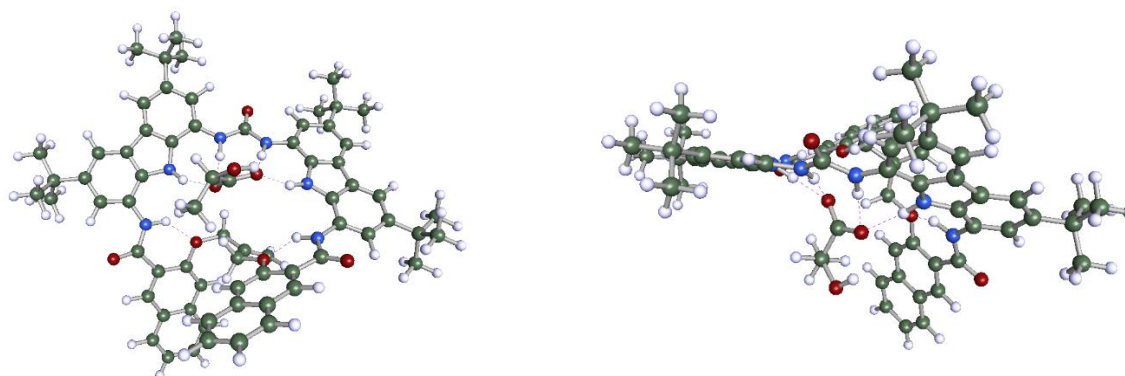

G = -2286344.56364 kcal/mol

**3.2.30** Lowest energy conformation of receptor CzU-BA with sorbate anion

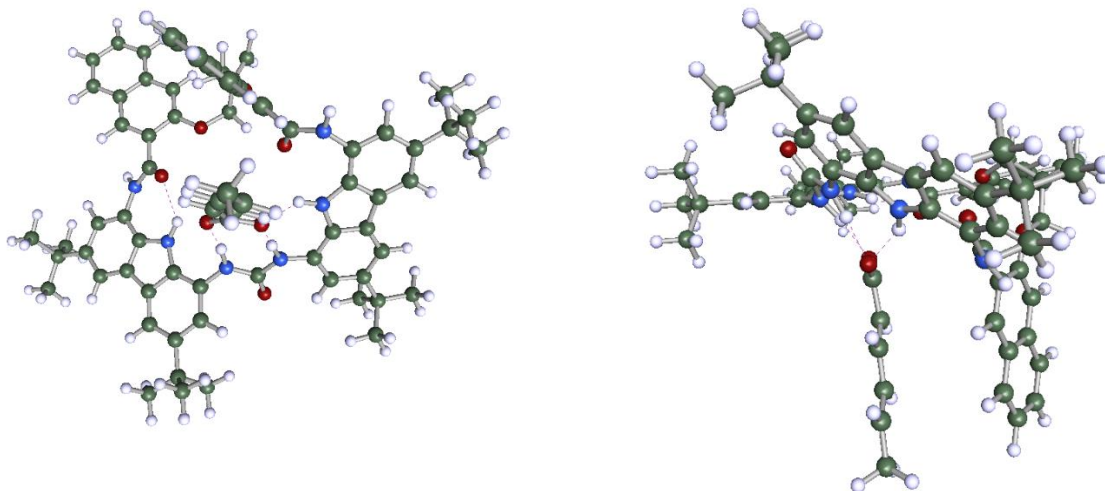

G = -2311606.75936 kcal/mol

**3.2.31** Lowest energy conformation of receptor CzU-BB

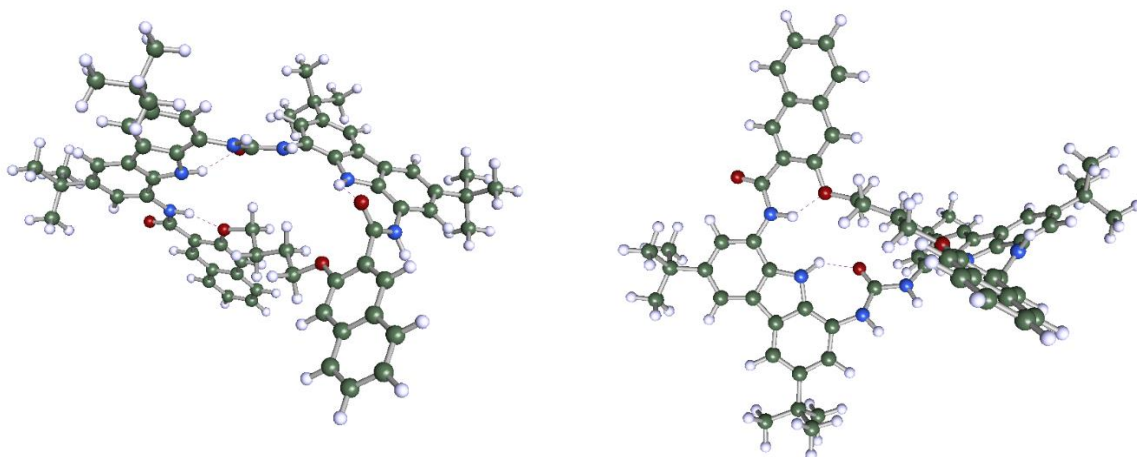

G = -2071664.41086 kcal/mol



**3.2.32** Lowest energy conformation of receptor CzU-BB with acetate anion

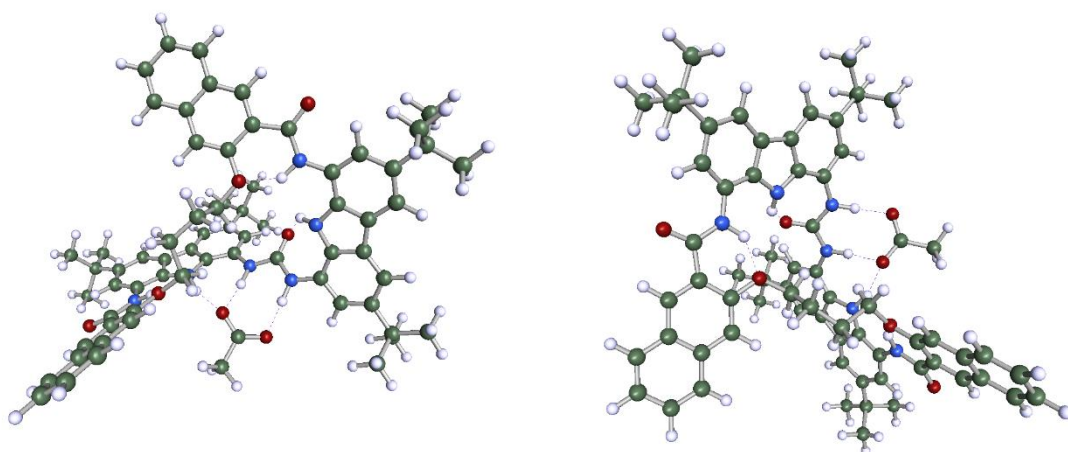

G = -2215214.80803 kcal/mol

**3.2.33** Lowest energy conformation of receptor CzU-BB with benzoate anion

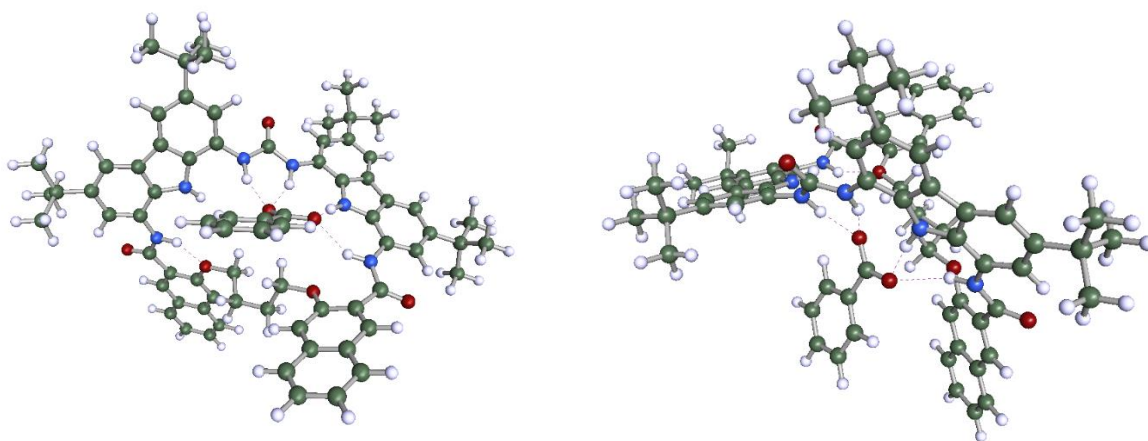

G = -2335574.26789 kcal/mol

**3.2.34** Lowest energy conformation of receptor CzU-BB with formate anion

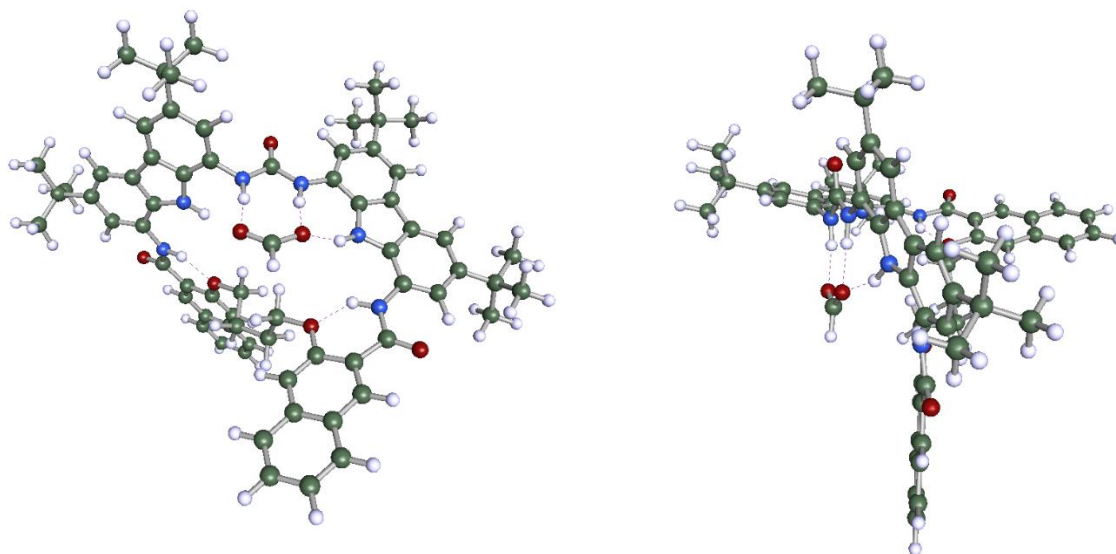

G = -2190528.87343 kcal/mol

**3.2.35** Lowest energy conformation of receptor CzU-BB with lactate anion

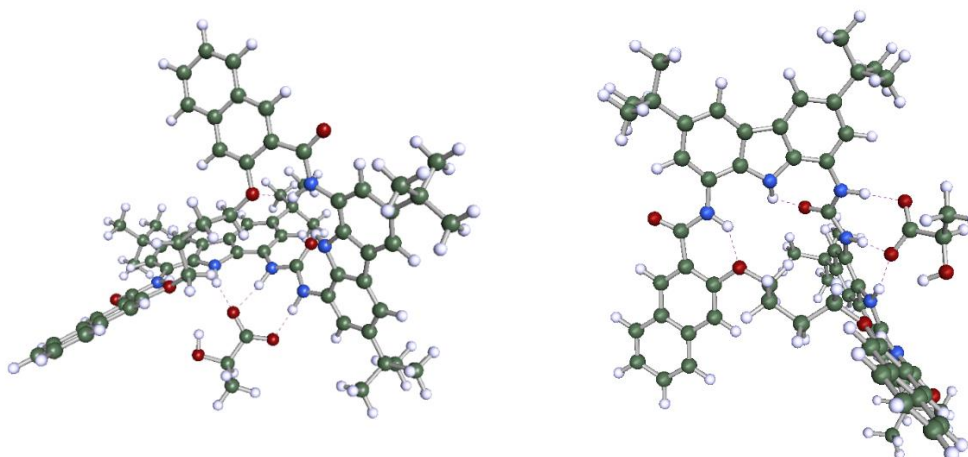

G = -2287119.60643 kcal/mol

3.2.36 Lowest energy conformation of receptor CzU-BB with sorbate anion

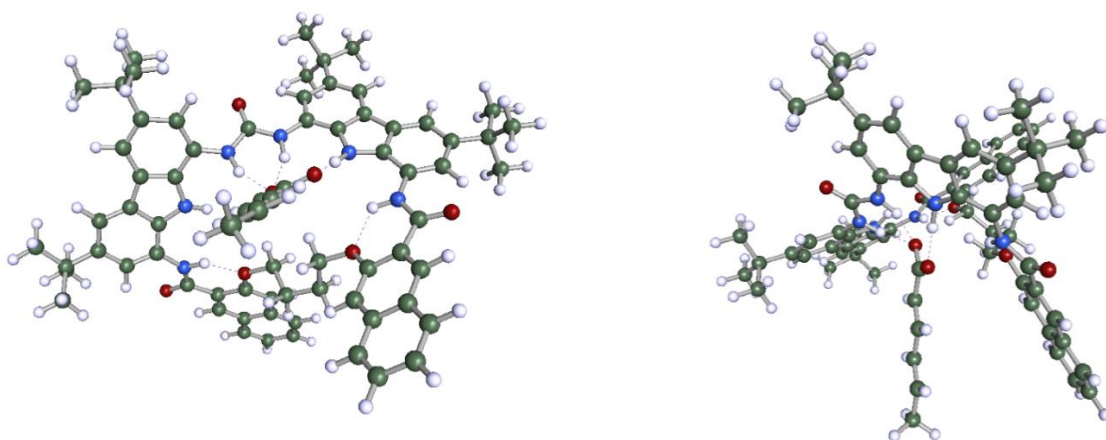

G = -2312389.97268 kcal/mol

### 3.3 Coordinates of most stable conformer geometries

#### 3.3.1 CzU-NeP free receptor

134 0

|   |          |          |           |
|---|----------|----------|-----------|
| C | 6.317868 | 5.075862 | 1.015234  |
| C | 5.169949 | 4.343863 | 1.335209  |
| C | 3.899789 | 4.632499 | 0.776501  |
| H | 5.276082 | 3.524024 | 2.042239  |
| C | 3.784217 | 5.696319 | -0.125848 |
| C | 6.183796 | 6.127643 | 0.090467  |
| C | 4.922136 | 6.444516 | -0.473414 |
| H | 2.821912 | 5.948059 | -0.570501 |
| C | 5.146568 | 7.555052 | -1.382854 |
| C | 2.693665 | 3.770536 | 1.198283  |
| C | 1.394058 | 4.203287 | 0.494442  |
| H | 1.471412 | 4.112936 | -0.599518 |
| H | 1.122616 | 5.241574 | 0.737167  |
| H | 0.567770 | 3.556875 | 0.825118  |
| C | 2.480225 | 3.894389 | 2.726347  |
| H | 2.278485 | 4.938299 | 3.010630  |
| H | 3.360495 | 3.552013 | 3.289512  |
| H | 1.620874 | 3.281549 | 3.040370  |
| C | 2.966278 | 2.289692 | 0.841216  |
| H | 2.113803 | 1.663198 | 1.146621  |
| H | 3.863544 | 1.906550 | 1.347964  |
| H | 3.109908 | 2.168153 | -0.243173 |
| N | 7.146633 | 7.013835 | -0.385213 |
| C | 6.537261 | 7.847249 | -1.321410 |
| H | 8.143213 | 6.801017 | -0.511808 |
| C | 4.286790 | 8.310625 | -2.196099 |
| C | 4.805832 | 9.349320 | -2.977327 |
| H | 3.222309 | 8.079837 | -2.209534 |

C 6.195770 9.603118 -2.918985  
C 7.080901 8.880647 -2.106748  
H 6.619422 10.405612 -3.527043  
C 3.926614 10.215438 -3.900147  
C 2.441947 9.812124 -3.831736  
H 2.032346 9.928297 -2.816878  
H 2.284122 8.770949 -4.150749  
H 1.857561 10.458331 -4.503234  
C 4.404028 10.058524 -5.363642  
H 4.327097 9.010488 -5.690868  
H 5.448806 10.377879 -5.488263  
H 3.782273 10.673351 -6.032855  
C 4.043771 11.701035 -3.483373  
H 3.420898 12.328343 -4.139780  
H 5.079005 12.064774 -3.555411  
H 3.703333 11.846509 -2.446922  
N 8.436004 9.298166 -2.069357  
C 9.559936 8.513280 -1.930990  
H 8.583425 10.256819 -2.381551  
O 9.513611 7.280225 -1.717362  
H 14.303948 12.137493 -1.165646  
H 16.338640 2.966507 -5.594449  
H 16.013067 11.033564 -2.732595  
H 15.166260 1.649831 -5.346193  
C 16.094158 2.098199 -4.963788  
C 14.793075 11.628074 -0.321884  
H 15.574362 12.299429 0.063858  
H 16.898927 1.355171 -5.078089  
C 16.486450 10.590581 -1.843499  
H 17.237225 11.301424 -1.464618  
H 14.049201 11.488698 0.476925

C 15.433479 10.293736 -0.748310  
N 7.587391 4.837794 1.597852  
N 11.128076 3.759562 -4.075800  
C 12.437984 4.075736 -3.638257  
C 13.521462 3.196094 -3.732973  
C 14.398486 9.290636 -1.296887  
C 12.682918 5.356864 -3.110604  
C 13.030403 9.613392 -1.397253  
C 12.063700 8.729424 -1.909180  
C 12.501736 7.462479 -2.327905  
H 17.013153 9.677772 -2.156775  
N 11.799632 6.417565 -2.926227  
C 14.814274 8.015233 -1.712082  
C 13.876275 7.103310 -2.210049  
C 13.987421 5.744096 -2.714814  
C 14.833030 3.555102 -3.333727  
N 10.738429 9.214984 -2.047963  
C 15.058482 4.842154 -2.830710  
C 15.960851 2.514797 -3.479202  
H 13.330683 2.201799 -4.131112  
H 10.798811 6.328393 -2.714073  
H 17.636712 3.936721 -3.600348  
H 12.682047 10.595234 -1.075694  
H 15.865270 7.727764 -1.651542  
H 16.055299 5.151994 -2.518801  
C 17.321532 3.062804 -3.010711  
H 18.089351 2.284526 -3.132892  
H 14.677764 0.802810 -2.945563  
C 15.623430 1.266414 -2.629649  
C 16.140744 9.681230 0.484173  
H 16.889017 10.385539 0.879992

H 16.418889 0.511596 -2.731747  
H 17.303518 3.350517 -1.948862  
H 15.417107 9.464139 1.284156  
H 16.660586 8.745973 0.231326  
H 15.534625 1.528454 -1.564319  
H 10.667196 10.230831 -2.078470  
C 10.503534 2.530886 -4.062419  
H 10.581225 4.537291 -4.440436  
C 8.113213 3.634883 2.018009  
H 8.178100 5.656733 1.729246  
O 11.045442 1.510883 -3.613973  
O 7.509955 2.560503 1.887776  
C 9.494066 3.734952 2.647600  
C 9.095022 2.534194 -4.637203  
C 9.528218 3.601077 4.203665  
H 9.970032 4.689541 2.371579  
H 10.101687 2.926651 2.212618  
C 8.952811 1.906632 -6.060251  
H 8.701558 3.562224 -4.671688  
H 8.464107 1.963909 -3.938140  
C 8.639008 4.676023 4.855311  
H 7.578301 4.539737 4.594663  
H 8.940292 5.687752 4.541480  
H 8.720954 4.625456 5.951735  
C 9.066506 2.201138 4.648660  
H 9.132133 2.114895 5.744385  
H 9.702087 1.418155 4.207100  
H 8.028355 2.002219 4.349219  
C 10.989911 3.813972 4.644157  
H 11.079421 3.715323 5.737134  
H 11.347902 4.816213 4.362467

H 11.655677 3.069521 4.180745  
C 9.279436 0.402516 -6.035195  
H 10.316515 0.218554 -5.722642  
H 9.139461 -0.029917 -7.038182  
H 8.616065 -0.133333 -5.338619  
C 7.486269 2.097508 -6.494567  
H 6.797016 1.609390 -5.788300  
H 7.321293 1.655958 -7.489535  
H 7.222604 3.164924 -6.548106  
C 9.877359 2.624962 -7.060943  
H 9.673261 3.706690 -7.088406  
H 9.722740 2.227139 -8.075521  
H 10.939050 2.484345 -6.807004

### 3.3.2 CzU-NeP acetate complex

141 -1

C -4.891467 -1.103869 1.567529  
C -6.172165 -1.293059 2.103329  
C -6.979177 -0.223134 2.569337  
H -6.540361 -2.313618 2.163118  
C -6.487346 1.082925 2.489591  
C -4.410874 0.223991 1.503430  
C -5.207840 1.312544 1.953076  
H -7.082454 1.927783 2.835167  
C -4.426648 2.513588 1.724568  
C -8.372195 -0.548599 3.143533  
C -9.124627 0.715776 3.598182  
H -9.293838 1.414371 2.764741  
H -8.582872 1.250808 4.392443  
H -10.108877 0.430898 3.998698



C -8.221301 -1.486013 4.365353  
H -7.627611 -1.004721 5.157569  
H -7.725080 -2.428921 4.094144  
H -9.210900 -1.732895 4.780828  
C -9.227237 -1.255215 2.063962  
H -10.224204 -1.495176 2.465400  
H -8.764983 -2.194762 1.728913  
H -9.358596 -0.607781 1.183807  
N -3.197787 0.703268 1.033345  
C -3.202775 2.085739 1.148512  
H -2.472260 0.119239 0.559127  
C -4.668856 3.884116 1.937978  
C -3.693107 4.820340 1.583539  
H -5.616428 4.200070 2.373433  
C -2.468925 4.367671 1.023430  
C -2.197203 3.012999 0.796600  
H -1.701735 5.085516 0.744509  
C -3.891323 6.336086 1.784534  
C -5.264397 6.668386 2.397357  
H -5.391492 6.209334 3.389549  
H -6.091867 6.334178 1.753568  
H -5.356160 7.757815 2.520028  
C -3.785673 7.057832 0.419215  
H -4.559115 6.696343 -0.275468  
H -2.804953 6.896772 -0.051450  
H -3.922209 8.142370 0.551138  
C -2.796345 6.881275 2.732763  
H -2.923694 7.965608 2.877214  
H -1.787852 6.711612 2.329648  
H -2.855022 6.395083 3.718448  
N -0.997670 2.509299 0.258853

C -0.021851 3.196508 -0.455800  
H -0.821058 1.508264 0.392141  
O -0.058057 4.411088 -0.697443  
H 1.845874 6.014058 -3.916695  
H 7.440477 -2.691170 -4.463233  
H 3.275833 4.681945 -5.586454  
H 7.570887 -3.682648 -2.991035  
C 8.059967 -2.890139 -3.575506  
C 2.777783 6.400657 -3.478011  
H 3.033485 7.332080 -4.005198  
H 9.033751 -3.274923 -3.916708  
C 4.166622 5.138786 -5.129228  
H 4.372027 6.086346 -5.651835  
H 2.583483 6.656206 -2.425535  
C 3.939131 5.399137 -3.620623  
N -4.077608 -2.152770 1.074034  
N 4.050184 -2.337543 -0.092668  
C 4.832957 -1.540694 -0.964899  
C 6.089869 -1.925038 -1.445119  
C 3.660331 4.060443 -2.904706  
C 4.351020 -0.269401 -1.337016  
C 2.446414 3.834131 -2.214095  
C 2.169239 2.626901 -1.551093  
C 3.157688 1.623005 -1.597016  
H 5.019732 4.466934 -5.300819  
N 3.159174 0.361132 -1.002329  
C 4.626336 3.044520 -2.940820  
C 4.378151 1.824340 -2.292256  
C 5.145442 0.601871 -2.129618  
C 6.886585 -1.084475 -2.262282  
N 0.984600 2.336933 -0.856326

C 6.406757 0.188044 -2.591453  
C 8.257318 -1.602191 -2.741240  
H 6.452790 -2.911428 -1.167019  
H 2.308836 -0.095646 -0.627656  
H 8.425507 -0.322794 -4.524115  
H 1.685485 4.607472 -2.172255  
H 5.570463 3.192456 -3.467963  
H 6.998930 0.865824 -3.205771  
C 8.995136 -0.571484 -3.616069  
H 9.962977 -0.987542 -3.932581  
H 8.697807 -2.691277 -0.874094  
C 9.148185 -1.921051 -1.516692  
C 5.209575 6.048345 -3.021014  
H 5.424314 7.003120 -3.526623  
H 10.130169 -2.292650 -1.848649  
H 9.196392 0.361767 -3.068840  
H 5.076116 6.252448 -1.947701  
H 6.089645 5.399903 -3.137362  
H 9.311511 -1.020642 -0.905126  
H 0.843105 1.348244 -0.590976  
C 4.048167 -3.709659 0.038807  
H 3.431989 -1.830507 0.537629  
C -4.198101 -3.502859 1.316258  
H -3.269977 -1.880762 0.498857  
O 4.727882 -4.452742 -0.683339  
O -5.063332 -3.985823 2.065003  
C -3.181302 -4.369628 0.587658  
C 3.142919 -4.237609 1.140942  
C -3.761503 -5.229545 -0.580484  
H -2.740777 -5.047912 1.335444  
H -2.369962 -3.741505 0.188268

C 3.878790 -4.733377 2.427722  
H 2.579426 -5.082174 0.715384  
H 2.413371 -3.468164 1.437448  
C -4.749447 -6.288307 -0.057203  
H -5.614782 -5.825480 0.435933  
H -4.262018 -6.955118 0.671275  
H -5.114209 -6.906214 -0.892301  
C -4.463450 -4.326520 -1.611680  
H -4.810886 -4.923595 -2.468723  
H -3.781718 -3.550997 -1.994201  
H -5.340957 -3.823043 -1.178272  
C -2.573837 -5.945280 -1.253626  
H -2.928005 -6.584328 -2.077095  
H -2.036736 -6.584035 -0.535480  
H -1.856057 -5.222223 -1.670123  
C 4.733149 -3.601892 3.027599  
H 5.546997 -3.302952 2.349375  
H 5.191850 -3.930545 3.972568  
H 4.122500 -2.710754 3.241791  
C 2.790930 -5.142525 3.440614  
H 2.148529 -4.287830 3.702700  
H 3.252790 -5.518620 4.366293  
H 2.150094 -5.940063 3.033400  
C 4.766189 -5.953470 2.121836  
H 4.170033 -6.779926 1.704831  
H 5.243292 -6.312328 3.047047  
H 5.555867 -5.708381 1.399035  
O 0.513281 -0.325000 -0.075274  
C -0.339581 -1.192912 -0.475056  
O -1.589309 -1.105493 -0.259865  
H -0.572862 -2.759875 -1.955697

C 0.170504 -2.414649 -1.226694  
H 1.120929 -2.209173 -1.734016  
H 0.337346 -3.229469 -0.505787

### 3.3.3 CzU-NeP benzoate complex

148 -1

C -5.014783 -0.895242 2.331110  
C -6.388504 -1.036670 2.574664  
C -7.356951 -0.121342 2.086793  
H -6.699526 -1.895425 3.162869  
C -6.935263 0.975884 1.331482  
C -4.610156 0.221595 1.561123  
C -5.564278 1.151850 1.069134  
H -7.652175 1.697719 0.941008  
C -4.817354 2.152858 0.332390  
C -8.841907 -0.384111 2.407771  
C -9.764730 0.703009 1.826131  
H -9.695500 0.755502 0.729253  
H -9.532309 1.698208 2.234286  
H -10.809247 0.472082 2.083636  
C -9.045567 -0.418067 3.941454  
H -8.762082 0.543669 4.395740  
H -8.444460 -1.207684 4.414549  
H -10.103047 -0.611319 4.180215  
C -9.265964 -1.747247 1.809502  
H -10.324106 -1.950560 2.036926  
H -8.667807 -2.573650 2.219465  
H -9.144051 -1.749336 0.715561  
N -3.340027 0.595908 1.143556  
C -3.451539 1.773707 0.412843

H -2.463829 0.167229 1.519945  
C -5.197785 3.316804 -0.362035  
C -4.218142 4.098655 -0.979440  
H -6.250304 3.595256 -0.406324  
C -2.860631 3.690699 -0.906359  
C -2.445809 2.534465 -0.230124  
H -2.089688 4.286058 -1.388414  
C -4.555660 5.392269 -1.747260  
C -6.064990 5.697954 -1.738986  
H -6.449211 5.836144 -0.717031  
H -6.647455 4.898155 -2.220881  
H -6.252461 6.628444 -2.295190  
C -4.100019 5.256997 -3.220066  
H -4.613549 4.417551 -3.712886  
H -3.016836 5.084372 -3.295964  
H -4.334282 6.177390 -3.777467  
C -3.818769 6.587242 -1.095664  
H -4.047584 7.517447 -1.638914  
H -2.728395 6.448133 -1.109241  
H -4.132033 6.716203 -0.048361  
N -1.118188 2.073812 -0.165198  
C 0.029500 2.740112 -0.568874  
H -0.966126 1.093901 0.144170  
O 0.060057 3.916603 -0.961109  
H 2.950726 6.412784 -0.262839  
H 8.049944 -0.830814 -5.625883  
H 4.571973 6.175253 -2.238524  
H 7.707622 -2.539730 -5.262160  
C 8.379276 -1.699363 -5.035346  
C 3.798552 6.239186 0.416328  
H 4.234367 7.219262 0.661345

H 9.390651 -1.977756 -5.369965  
C 5.386094 6.054483 -1.507592  
H 5.775643 7.054659 -1.261166  
H 3.410779 5.803634 1.349238  
C 4.877609 5.348025 -0.227415  
N -4.025675 -1.795054 2.793511  
N 3.650661 -2.707712 -2.970267  
C 4.599290 -1.657719 -2.834343  
C 5.921547 -1.911408 -3.223480  
C 4.345609 3.947627 -0.598224  
C 4.320170 -0.402432 -2.264174  
C 2.993257 3.590992 -0.394744  
C 2.482346 2.327282 -0.734136  
C 3.374436 1.403277 -1.304695  
H 6.194252 5.485350 -1.989211  
N 3.141471 0.093876 -1.719178  
C 5.221534 2.999484 -1.150858  
C 4.742173 1.730703 -1.505873  
C 5.355425 0.563679 -2.119077  
C 6.970942 -0.976774 -3.070795  
N 1.151219 1.925897 -0.491451  
C 6.670685 0.271752 -2.511703  
C 8.391198 -1.366295 -3.524130  
H 6.134889 -2.889431 -3.660582  
H 2.247885 -0.269976 -2.071809  
H 9.143321 0.676005 -3.852294  
H 2.302308 4.307197 0.041134  
H 6.272078 3.244962 -1.316112  
H 7.449001 1.021460 -2.372532  
C 9.405969 -0.232260 -3.288951  
H 10.401180 -0.557357 -3.626534

H 8.201135 -3.472589 -2.896836  
C 8.863091 -2.610143 -2.733074  
C 6.048203 5.210804 0.774980  
H 6.439284 6.205583 1.039998  
H 9.876829 -2.898650 -3.051135  
H 9.485244 0.032262 -2.223719  
H 5.715813 4.716325 1.700388  
H 6.878089 4.625011 0.354680  
H 8.889288 -2.401550 -1.652666  
H 0.997762 0.958300 -0.162273  
C 2.309945 -2.635613 -3.249597  
H 4.052292 -3.643799 -2.967848  
C -4.190354 -2.957902 3.511671  
H -3.048461 -1.542743 2.590236  
O 1.700565 -1.554612 -3.364571  
O -5.295985 -3.372836 3.898695  
C -2.898481 -3.710351 3.796747  
C 1.618923 -3.979096 -3.411462  
C -2.718228 -5.042633 3.000839  
H -2.891987 -3.943876 4.873146  
H -2.033192 -3.062539 3.589949  
C 1.244111 -4.360978 -4.879740  
H 0.695806 -3.939581 -2.813709  
H 2.247909 -4.779770 -2.992665  
C -3.770737 -6.087988 3.413415  
H -4.789999 -5.741957 3.196089  
H -3.709156 -6.303765 4.491483  
H -3.599899 -7.029591 2.868200  
C -2.812728 -4.778667 1.486598  
H -2.614247 -5.703802 0.924287  
H -2.077701 -4.024191 1.166574



H -3.813420 -4.421902 1.198970  
C -1.315689 -5.585895 3.336929  
H -1.135402 -6.535487 2.809511  
H -1.212187 -5.772786 4.417095  
H -0.530551 -4.874582 3.038440  
C 2.495928 -4.339875 -5.776551  
H 2.917359 -3.326740 -5.862068  
H 2.243024 -4.681506 -6.791826  
H 3.280165 -5.006452 -5.384459  
C 0.669668 -5.791044 -4.840000  
H 1.413835 -6.509000 -4.461999  
H 0.370717 -6.110656 -5.849915  
H -0.217933 -5.843541 -4.190804  
C 0.178243 -3.405660 -5.447046  
H -0.732147 -3.419554 -4.828232  
H -0.099165 -3.715782 -6.466382  
H 0.543260 -2.370495 -5.488725  
C 2.007925 -2.473170 4.457413  
C 0.917942 -1.874469 3.819615  
H -0.000538 -1.665438 4.369323  
H 1.943017 -2.736096 5.514974  
O -1.284397 -0.783712 2.418831  
C 3.181383 -2.737231 3.740221  
C 0.990069 -1.525777 2.460499  
C -0.185597 -0.866496 1.773631  
H 4.032094 -3.208465 4.236421  
C 3.261769 -2.393089 2.384664  
C 2.174014 -1.786542 1.750384  
O -0.019588 -0.415960 0.593748  
H 4.176196 -2.597421 1.824289  
H 2.228024 -1.506820 0.697383

### 3.3.4 CzU-NeP lactate complex

145 -1

|   |            |           |           |
|---|------------|-----------|-----------|
| C | -4.750454  | -0.648037 | 2.560762  |
| C | -6.103775  | -0.865183 | 2.853625  |
| C | -7.133790  | 0.023566  | 2.451479  |
| H | -6.350184  | -1.751284 | 3.431846  |
| C | -6.794806  | 1.171942  | 1.730806  |
| C | -4.432014  | 0.507947  | 1.810680  |
| C | -5.447949  | 1.417671  | 1.408730  |
| H | -7.558625  | 1.881703  | 1.414475  |
| C | -4.779722  | 2.489569  | 0.696498  |
| C | -8.589291  | -0.319078 | 2.826432  |
| C | -9.585199  | 0.743022  | 2.324369  |
| H | -9.564218  | 0.838445  | 1.228374  |
| H | -9.383258  | 1.732960  | 2.760812  |
| H | -10.605967 | 0.452803  | 2.614602  |
| C | -8.721546  | -0.414815 | 4.365288  |
| H | -8.463769  | 0.543770  | 4.840999  |
| H | -8.062418  | -1.189521 | 4.782764  |
| H | -9.756602  | -0.667813 | 4.643043  |
| C | -8.978275  | -1.678985 | 2.197887  |
| H | -10.015981 | -1.936450 | 2.461218  |
| H | -8.328430  | -2.491347 | 2.553274  |
| H | -8.903210  | -1.638688 | 1.100541  |
| N | -3.198889  | 0.974902  | 1.378868  |
| C | -3.396960  | 2.168321  | 0.697183  |
| H | -2.302992  | 0.455261  | 1.486518  |
| C | -5.234856  | 3.678308  | 0.095616  |
| C | -4.316360  | 4.540582  | -0.509670 |
| H | -6.298502  | 3.914123  | 0.112781  |
| C | -2.940846  | 4.190279  | -0.514899 |

C -2.453544 3.017934 0.076471  
H -2.215500 4.849684 -0.984916  
C -4.740456 5.861715 -1.181609  
C -6.260505 6.095229 -1.099721  
H -6.609585 6.155780 -0.057881  
H -6.825269 5.298576 -1.607108  
H -6.511476 7.046920 -1.591516  
C -4.337092 5.838110 -2.675412  
H -4.832409 5.007755 -3.201126  
H -3.251267 5.721471 -2.802601  
H -4.634058 6.779331 -3.164105  
C -4.032347 7.047244 -0.482814  
H -4.320367 7.997187 -0.959594  
H -2.938094 6.958355 -0.541574  
H -4.312548 7.098845 0.580280  
N -1.099859 2.626653 0.077420  
C 0.017451 3.421163 -0.155114  
H -0.905366 1.625745 0.205544  
O -0.022947 4.628888 -0.426489  
H 2.822153 7.077083 -1.291228  
H 7.494737 -1.313644 -4.932108  
H 4.343252 6.293907 -3.210610  
H 7.282105 -2.851465 -4.061827  
C 7.944490 -1.982305 -4.182424  
C 3.715042 7.128856 -0.650202  
H 4.131357 8.143298 -0.740086  
H 8.906251 -2.343965 -4.578475  
C 5.198883 6.406941 -2.527570  
H 5.568345 7.441213 -2.609105  
H 3.398682 6.990021 0.394466  
C 4.783227 6.100791 -1.068592

N -3.707266 -1.515855 2.966127  
N 3.536323 -2.331290 -1.239684  
C 4.541154 -1.366718 -1.517028  
C 5.801736 -1.711051 -2.014009  
C 4.275859 4.646126 -0.973295  
C 4.285113 -0.002796 -1.277576  
C 2.963960 4.349717 -0.533352  
C 2.478533 3.035338 -0.446324  
C 3.359718 1.992070 -0.791772  
H 5.998759 5.735242 -2.871088  
N 3.126408 0.619377 -0.835388  
C 5.131068 3.591968 -1.326153  
C 4.679716 2.265524 -1.237814  
C 5.277254 0.979397 -1.550608  
C 6.807487 -0.753155 -2.295343  
N 1.182605 2.681469 -0.029262  
C 6.530257 0.598399 -2.060178  
C 8.163549 -1.239175 -2.843078  
H 5.996711 -2.766113 -2.198207  
H 2.318511 0.146945 -0.402330  
H 8.749348 0.636368 -3.835476  
H 2.281376 5.149869 -0.263158  
H 6.145809 3.793001 -1.674843  
H 7.275768 1.364600 -2.271278  
C 9.140744 -0.075184 -3.092715  
H 10.090425 -0.472455 -3.480153  
H 8.184228 -3.087049 -1.639992  
C 8.815602 -2.206449 -1.826134  
C 6.010996 6.279216 -0.143549  
H 6.389093 7.311735 -0.206761  
H 9.785126 -2.562247 -2.207959

H 9.363738 0.478109 -2.167757  
H 5.744322 6.076117 0.904900  
H 6.830514 5.601792 -0.423197  
H 8.990540 -1.703418 -0.862795  
H 1.038422 1.683213 0.183647  
C 3.210450 -3.406039 -2.032835  
H 2.967311 -2.175221 -0.395293  
C -3.743847 -2.482924 3.946668  
H -2.786120 -1.363747 2.538123  
O 3.773396 -3.643487 -3.112704  
O -4.754855 -2.730045 4.623689  
C -2.433675 -3.232913 4.141131  
C 2.091848 -4.280968 -1.483915  
C -2.456063 -4.732422 3.706866  
H -2.191130 -3.183053 5.214765  
H -1.626269 -2.721688 3.594189  
C 2.520806 -5.718085 -1.051727  
H 1.329768 -4.366262 -2.275152  
H 1.618045 -3.785124 -0.622760  
C -3.387226 -5.562996 4.609416  
H -4.425029 -5.209640 4.549926  
H -3.069121 -5.503951 5.661823  
H -3.360371 -6.620724 4.304742  
C -2.905953 -4.856275 2.239566  
H -2.849398 -5.904276 1.908185  
H -2.267185 -4.256427 1.572661  
H -3.945446 -4.519737 2.105569  
C -1.018579 -5.268674 3.848789  
H -0.976211 -6.334514 3.577306  
H -0.656273 -5.166584 4.883520  
H -0.322720 -4.725157 3.190590

C 3.674709 -5.649720 -0.034524  
H 4.582883 -5.218182 -0.481784  
H 3.927495 -6.658215 0.326906  
H 3.401847 -5.037634 0.839342  
C 1.295859 -6.379766 -0.390548  
H 0.978822 -5.827236 0.507556  
H 1.533603 -7.410558 -0.086539  
H 0.442578 -6.418465 -1.085108  
C 2.946871 -6.560850 -2.267914  
H 2.125961 -6.641801 -2.998060  
H 3.214716 -7.579218 -1.945614  
H 3.811631 -6.117583 -2.779175  
O 0.489729 -0.009122 0.372321  
H 0.719769 -2.536492 2.297362  
C 0.126975 -0.694755 1.379738  
H 3.063956 -2.006996 1.943453  
C 1.166705 -1.539021 2.140242  
O 2.367183 -1.671528 1.349172  
H 0.562405 -0.819294 4.098982  
C 1.476896 -0.901850 3.497800  
H 2.197798 -1.520860 4.052256  
H 1.905424 0.101860 3.363943  
O -1.048675 -0.724397 1.855041

### 3.3.5 CzU-NeP formate complex

138 -1

C -4.895686 -1.150598 1.660458  
C -6.179508 -1.332452 2.193165  
C -7.005667 -0.252879 2.600664  
H -6.533966 -2.354866 2.290978

C -6.532232 1.055001 2.465611  
C -4.432765 0.181351 1.543787  
C -5.248657 1.277782 1.935284  
H -7.142970 1.906297 2.764982  
C -4.479748 2.478721 1.665985  
C -8.398584 -0.572134 3.178639  
C -9.171631 0.699956 3.572454  
H -9.344479 1.359231 2.708292  
H -8.643150 1.276775 4.346203  
H -10.154828 0.419172 3.978560  
C -8.244418 -1.452962 4.441458  
H -7.661832 -0.930173 5.215297  
H -7.735280 -2.400991 4.215621  
H -9.233800 -1.693454 4.861135  
C -9.235330 -1.337490 2.125340  
H -10.231454 -1.575041 2.530261  
H -8.756618 -2.283592 1.834334  
H -9.369898 -0.730987 1.216918  
N -3.223102 0.658925 1.062986  
C -3.241042 2.043691 1.128619  
H -2.453924 0.067705 0.686425  
C -4.741844 3.853905 1.815921  
C -3.770020 4.786262 1.440563  
H -5.701015 4.176470 2.219976  
C -2.529109 4.325822 0.925294  
C -2.237355 2.966465 0.760380  
H -1.765213 5.041431 0.632294  
C -3.990891 6.306620 1.570387  
C -5.379432 6.647110 2.142745  
H -5.519443 6.231334 3.152080  
H -6.190249 6.272938 1.499751

H -5.487288 7.739538 2.214328  
C -3.869073 6.968359 0.176407  
H -4.625513 6.566837 -0.515092  
H -2.878201 6.799123 -0.269521  
H -4.020962 8.055897 0.257282  
C -2.921254 6.908133 2.513428  
H -3.065935 7.995755 2.607787  
H -1.903083 6.735563 2.136763  
H -2.991937 6.464698 3.518331  
N -1.018931 2.455367 0.271443  
C -0.036705 3.126253 -0.450404  
H -0.832017 1.466386 0.458659  
O -0.104418 4.321325 -0.768930  
H 1.815326 5.942028 -3.846076  
H 7.389370 -2.742005 -4.548096  
H 3.211740 4.608805 -5.542624  
H 7.537401 -3.753510 -3.091266  
C 8.021435 -2.955739 -3.672798  
C 2.755630 6.330086 -3.427136  
H 2.999835 7.260749 -3.961078  
H 8.987877 -3.340912 -4.033949  
C 4.111488 5.066525 -5.104223  
H 4.306003 6.013285 -5.632407  
H 2.582584 6.587340 -2.371370  
C 3.914536 5.329041 -3.591656  
N -4.053859 -2.203524 1.229723  
N 4.066092 -2.437956 -0.128528  
C 4.844843 -1.625346 -0.990409  
C 6.090328 -2.009857 -1.497990  
C 3.651501 3.991245 -2.868250  
C 4.367949 -0.343122 -1.328787



C 2.452460 3.765687 -2.152386  
C 2.185505 2.559404 -1.482262  
C 3.173630 1.554612 -1.546859  
H 4.961071 4.394495 -5.291936  
N 3.186545 0.287227 -0.966709  
C 4.616717 2.976137 -2.922013  
C 4.380745 1.757135 -2.267375  
C 5.149132 0.532709 -2.129186  
C 6.877908 -1.161895 -2.316795  
N 1.013137 2.279670 -0.760120  
C 6.398417 0.116956 -2.621497  
C 8.238031 -1.679688 -2.825153  
H 6.450908 -3.003760 -1.243939  
H 2.365047 -0.162913 -0.529097  
H 8.384020 -0.378156 -4.593953  
H 1.692238 4.538491 -2.097960  
H 5.549798 3.122250 -3.469004  
H 6.981833 0.798026 -3.240555  
C 8.966576 -0.640906 -3.698112  
H 9.927593 -1.056787 -4.034945  
H 8.702879 -2.794960 -0.979504  
C 9.146877 -2.018582 -1.619159  
C 5.196473 5.979907 -3.019088  
H 5.400350 6.933953 -3.530534  
H 10.121601 -2.390417 -1.971527  
H 9.180271 0.284349 -3.142068  
H 5.084683 6.185744 -1.943643  
H 6.074340 5.331715 -3.152242  
H 9.324154 -1.127022 -0.998567  
H 0.898186 1.307667 -0.432570  
C 4.017288 -3.813945 -0.073114

H 3.478495 -1.943914 0.540312  
C -4.252650 -3.562105 1.333711  
H -3.161561 -1.934229 0.795945  
O 4.654659 -4.538789 -0.850439  
O -5.247490 -4.068840 1.878589  
C -3.144943 -4.405849 0.718472  
C 3.115799 -4.371023 1.017942  
C -3.534272 -5.152477 -0.597515  
H -2.851579 -5.153755 1.471685  
H -2.265743 -3.776168 0.512350  
C 3.858102 -4.962609 2.259247  
H 2.513153 -5.169236 0.558114  
H 2.420563 -3.593556 1.372053  
C -4.597560 -6.233869 -0.330715  
H -5.525372 -5.797612 0.062420  
H -4.233387 -6.971446 0.401447  
H -4.832497 -6.769187 -1.264054  
C -4.058124 -4.152882 -1.645348  
H -4.260794 -4.667641 -2.597080  
H -3.322374 -3.357670 -1.840201  
H -4.995473 -3.677194 -1.317919  
C -2.256281 -5.828605 -1.132179  
H -2.477273 -6.394407 -2.050406  
H -1.840804 -6.531059 -0.393016  
H -1.480661 -5.084592 -1.370402  
C 4.766279 -3.897341 2.899845  
H 5.576721 -3.591701 2.220629  
H 5.231006 -4.293284 3.815524  
H 4.194086 -2.997290 3.175234  
C 2.776904 -5.386923 3.273056  
H 2.172359 -4.525031 3.594760

H 3.243227 -5.828829 4.166890  
H 2.098726 -6.137802 2.838480  
C 4.693168 -6.195116 1.868186  
H 4.058094 -6.976051 1.422166  
H 5.176647 -6.619712 2.761623  
H 5.475353 -5.939626 1.140800  
O 0.661377 -0.383751 0.177070  
C -0.182217 -1.325802 0.051817  
O -1.437828 -1.225750 0.151693  
H 0.226262 -2.340216 -0.165326

### 3.3.6 CzU-NeP sorbate complex

149 -1

C -4.759088 -0.770723 1.600373  
C -6.010796 -0.987942 2.189295  
C -6.828955 0.066775 2.670181  
H -6.346277 -2.017295 2.284403  
C -6.378144 1.384955 2.547451  
C -4.322185 0.567329 1.489961  
C -5.129784 1.641639 1.953012  
H -6.982594 2.218272 2.904465  
C -4.388819 2.858318 1.674720  
C -8.187070 -0.285970 3.308399  
C -8.957454 0.966064 3.767074  
H -9.179412 1.641625 2.927084  
H -8.400952 1.533065 4.528223  
H -9.916397 0.661807 4.212185  
C -7.958306 -1.191155 4.542285  
H -7.346322 -0.675877 5.298355  
H -7.446683 -2.125750 4.270812

H -8.922148 -1.456358 5.004483  
C -9.064530 -1.040399 2.280485  
H -10.037271 -1.298505 2.727529  
H -8.590331 -1.974639 1.947088  
H -9.249876 -0.417086 1.392589  
N -3.134425 1.065954 0.975078  
C -3.176835 2.451763 1.060500  
H -2.471467 0.497024 0.399626  
C -4.656991 4.225720 1.877295  
C -3.719169 5.179532 1.471220  
H -5.594788 4.525193 2.344364  
C -2.503793 4.748953 0.875384  
C -2.204203 3.397166 0.665518  
H -1.762396 5.479820 0.562553  
C -3.950747 6.693156 1.651381  
C -5.308453 7.001374 2.309567  
H -5.385952 6.559033 3.314163  
H -6.150092 6.632691 1.704063  
H -5.425004 8.090295 2.414628  
C -3.916676 7.389262 0.269229  
H -4.706600 6.993974 -0.387525  
H -2.950937 7.243708 -0.235820  
H -4.077017 8.472350 0.385316  
C -2.836138 7.286607 2.546094  
H -2.988646 8.369568 2.675429  
H -1.839381 7.137568 2.107078  
H -2.843131 6.818190 3.541999  
N -1.011600 2.907313 0.102864  
C -0.003814 3.613053 -0.546442  
H -0.837149 1.903091 0.215258  
O -0.003072 4.840120 -0.716724

H 2.147411 6.600297 -3.725907  
H 7.314805 -2.337802 -4.684611  
H 3.586972 5.318374 -5.426580  
H 7.329687 -3.434549 -3.282971  
C 7.884997 -2.632622 -3.790572  
C 3.075722 6.908734 -3.221710  
H 3.396911 7.861509 -3.668581  
H 8.849838 -3.048257 -4.120853  
C 4.476446 5.699698 -4.902082  
H 4.746365 6.670681 -5.346442  
H 2.846517 7.098481 -2.162310  
C 4.194949 5.864162 -3.389152  
N -3.933392 -1.807932 1.098732  
N 3.762473 -2.090658 -0.436148  
C 4.632247 -1.285775 -1.212717  
C 5.884901 -1.707217 -1.672352  
C 3.823321 4.493409 -2.783689  
C 4.237585 0.034396 -1.510103  
C 2.571001 4.280392 -2.159389  
C 2.211637 3.043436 -1.599725  
C 3.155254 2.000106 -1.678345  
H 5.305602 5.002062 -5.087082  
N 3.067729 0.703077 -1.175534  
C 4.741813 3.435579 -2.858476  
C 4.411383 2.185398 -2.310622  
C 5.108187 0.913891 -2.208122  
C 6.758290 -0.856935 -2.396530  
N 0.988407 2.751342 -0.976933  
C 6.363455 0.461385 -2.650749  
C 8.117372 -1.418019 -2.860370  
H 6.180052 -2.730545 -1.454682

H 2.180017 0.271543 -0.859081  
H 8.428875 -0.030362 -4.540567  
H 1.844939 5.085098 -2.093421  
H 5.711690 3.574302 -3.339318  
H 7.016879 1.144799 -3.192377  
C 8.945706 -0.373522 -3.631810  
H 9.901750 -0.821538 -3.940844  
H 8.419925 -2.654070 -1.058812  
C 8.938844 -1.870511 -1.629238  
C 5.466529 6.406386 -2.692616  
H 5.746576 7.383156 -3.117357  
H 9.911025 -2.275707 -1.950439  
H 9.174788 0.506014 -3.011641  
H 5.295696 6.539052 -1.613268  
H 6.320092 5.725491 -2.820488  
H 9.127612 -1.024675 -0.950688  
H 0.810839 1.752345 -0.781826  
C 3.709193 -3.465912 -0.350917  
H 3.116117 -1.586498 0.167668  
C -3.917845 -3.127653 1.492074  
H -3.208826 -1.534741 0.422471  
O 4.423338 -4.208221 -1.039168  
O -4.663820 -3.580324 2.374784  
C -2.904195 -3.993793 0.756664  
C 2.700599 -3.996755 0.656666  
C -3.516820 -5.115913 -0.139203  
H -2.269801 -4.467437 1.523587  
H -2.252456 -3.363308 0.132447  
C 3.310297 -4.526357 1.995030  
H 2.165537 -4.823848 0.165875  
H 1.957927 -3.220996 0.899247

C -4.206469 -6.197301 0.712833  
H -5.036625 -5.779457 1.297288  
H -3.494151 -6.656358 1.416484  
H -4.601048 -6.993305 0.062289  
C -4.526653 -4.513074 -1.133278  
H -4.905542 -5.290744 -1.813680  
H -4.062658 -3.725246 -1.746510  
H -5.392156 -4.073175 -0.614495  
C -2.355245 -5.762163 -0.918977  
H -2.727943 -6.579435 -1.555375  
H -1.604325 -6.182872 -0.232483  
H -1.851155 -5.029448 -1.567521  
C 4.124011 -3.419990 2.690861  
H 5.000690 -3.122859 2.095097  
H 4.489827 -3.772970 3.666773  
H 3.510271 -2.522536 2.866738  
C 2.130489 -4.935504 2.898713  
H 1.477726 -4.076262 3.117379  
H 2.502285 -5.332352 3.855675  
H 1.519020 -5.717698 2.422748  
C 4.203966 -5.754766 1.746559  
H 3.637205 -6.563631 1.260204  
H 4.589793 -6.138349 2.703873  
H 5.060678 -5.509210 1.104235  
H 1.066158 -1.592251 -2.191455  
C -0.015750 -1.553052 -2.038242  
O 0.380183 0.065047 -0.352595  
C -0.495336 -0.683706 -0.933401  
O -1.729821 -0.688291 -0.616495  
H 0.246548 -4.563127 -6.100467  
H 0.676575 -3.122139 -4.154922

C -0.845589 -4.510952 -5.993331  
C -0.403853 -3.033079 -3.990841  
H -1.271987 -4.115041 -6.930270  
H -1.237979 -5.536652 -5.891798  
C -1.253822 -3.669853 -4.829616  
C -0.841819 -2.225896 -2.875806  
H -2.331354 -3.566827 -4.654602  
H -1.921425 -2.142718 -2.707166

### 3.3.7 Cz-Gly-NeP free receptor

143 0

C -4.992198 4.181691 2.534171  
C -6.133322 4.673652 3.176089  
C -6.675195 5.953315 2.896015  
H -6.609425 4.035346 3.916813  
C -6.052466 6.756799 1.933739  
C -4.365920 5.016707 1.589784  
C -4.896975 6.294392 1.280543  
H -6.446778 7.742804 1.690112  
C -4.011032 6.877195 0.287293  
C -7.936177 6.404250 3.659302  
C -8.394725 7.814596 3.244576  
H -8.653769 7.863158 2.176306  
H -7.623628 8.572409 3.448302  
H -9.292378 8.089667 3.818028  
C -7.640925 6.418969 5.178254  
H -6.826088 7.120657 5.412508  
H -7.349494 5.424676 5.545921  
H -8.536598 6.735384 5.735315  
C -9.094433 5.417534 3.375807



H -9.998799 5.728263 3.921812  
H -8.845773 4.394591 3.693234  
H -9.334138 5.392596 2.302054  
N -3.239671 4.776057 0.808583  
C -2.983814 5.918665 0.057701  
H -2.443553 4.171281 1.052679  
C -4.029462 8.094296 -0.411976  
C -3.015425 8.383113 -1.333399  
H -4.836633 8.802958 -0.230384  
C -1.993540 7.426156 -1.526758  
C -1.947374 6.198508 -0.851799  
H -1.190127 7.637284 -2.235592  
C -2.972241 9.696800 -2.137952  
C -4.153343 10.624319 -1.795718  
H -4.153168 10.912520 -0.733746  
H -5.121876 10.156501 -2.027536  
H -4.077120 11.545709 -2.391262  
C -3.029796 9.376297 -3.651031  
H -3.960176 8.845678 -3.904218  
H -2.183536 8.749366 -3.967110  
H -2.995857 10.307876 -4.236293  
C -1.657829 10.452252 -1.826402  
H -1.619549 11.393026 -2.396371  
H -0.772193 9.859256 -2.096467  
H -1.590268 10.696819 -0.755468  
N -0.884045 5.313076 -1.177682  
H 3.647071 10.351458 0.211758  
H 11.090922 6.228876 -5.777705  
H 5.003118 10.907537 -1.899690  
H 11.714180 4.624076 -5.324341  
C 11.865316 5.705706 -5.196721

C 4.537135 10.599140 0.809658  
H 4.484020 11.669837 1.056309  
H 12.846918 5.960655 -5.625673  
C 5.843497 11.179887 -1.243571  
H 5.745171 12.245362 -0.984065  
H 4.488222 10.037589 1.754597  
C 5.841663 10.317121 0.041285  
N -4.458852 2.888387 2.754984  
N 8.522326 2.583520 -2.589571  
C 8.783353 3.979622 -2.616985  
C 10.014331 4.410255 -3.129575  
C 5.990629 8.831471 -0.341963  
C 7.922098 4.955264 -2.077803  
C 5.017579 7.871173 -0.004109  
C 5.131377 6.508817 -0.331129  
C 6.270186 6.094331 -1.042599  
H 6.775277 11.056308 -1.813645  
N 6.698998 4.823128 -1.421259  
C 7.126547 8.400754 -1.045909  
C 7.264124 7.053676 -1.397028  
C 8.325208 6.318628 -2.062339  
C 10.434193 5.759940 -3.121846  
N 4.123512 5.633317 0.154167  
C 9.569725 6.715239 -2.574475  
C 11.812351 6.121703 -3.707192  
H 10.675627 3.646003 -3.543228  
H 6.032422 4.085227 -1.683430  
H 11.360507 8.223873 -4.177438  
H 4.126994 8.173987 0.547040  
H 7.912280 9.108592 -1.315803  
H 9.854535 7.766117 -2.532291

C 12.100664 7.631783 -3.618386  
H 13.090186 7.840481 -4.051176  
H 12.792103 4.279914 -2.990270  
C 12.918908 5.370386 -2.928753  
C 7.031580 10.737044 0.937647  
H 6.941877 11.799443 1.212817  
H 13.908084 5.617998 -3.343899  
H 12.111385 7.986187 -2.576635  
H 7.052836 10.143778 1.864121  
H 7.994151 10.602667 0.423789  
H 12.912354 5.654860 -1.865766  
C 7.330742 1.947148 -2.835799  
H 9.344252 1.989848 -2.494453  
C -4.511269 2.129965 3.905072  
H -3.987227 2.461294 1.960245  
O 6.284799 2.572670 -3.076295  
O -5.032475 2.539121 4.952140  
C -3.872951 0.754369 3.783514  
C 7.393134 0.429220 -2.785635  
C -4.873438 -0.437148 3.640083  
H -3.274195 0.600769 4.693985  
H -3.181484 0.729756 2.926184  
C 7.276091 -0.288197 -4.167976  
H 6.562073 0.095402 -2.145006  
H 8.328500 0.107027 -2.302260  
C -5.750792 -0.576246 4.897405  
H -6.370925 0.315999 5.060560  
H -5.132104 -0.726987 5.795432  
H -6.418629 -1.445478 4.794769  
C -5.765019 -0.246527 2.399007  
H -6.417694 -1.121918 2.260346

H -5.159854 -0.130509 1.486140  
H -6.411800 0.638713 2.494419  
C -4.029806 -1.715978 3.468759  
H -4.684015 -2.595956 3.371665  
H -3.371502 -1.876131 4.336679  
H -3.400298 -1.659532 2.567202  
C 8.363428 0.223646 -5.131226  
H 8.227788 1.290527 -5.366560  
H 8.325506 -0.333356 -6.079575  
H 9.369942 0.092515 -4.704138  
C 7.486566 -1.794026 -3.914924  
H 8.487944 -1.992226 -3.502467  
H 7.388154 -2.357570 -4.855030  
H 6.740682 -2.184020 -3.205165  
C 5.884274 -0.071437 -4.789243  
H 5.093822 -0.460338 -4.128643  
H 5.815322 -0.602297 -5.751235  
H 5.682062 0.993817 -4.965962  
C -0.298875 4.325883 -0.443641  
H -0.431691 5.520886 -2.068821  
C 3.606637 4.522804 -0.446481  
H 3.657095 5.945697 1.005789  
O -0.625191 4.004652 0.711794  
O 3.957117 4.105798 -1.558482  
C 0.820529 3.589603 -1.202696  
C 2.559761 3.796142 0.418260  
O 1.727831 2.922229 -0.336040  
H 1.345710 4.278556 -1.886296  
H 0.351439 2.805208 -1.815180  
H 1.964127 4.521778 0.998851  
H 3.097078 3.158504 1.135485

### 3.3.8 Cz-Gly-NeP acetate complex

150 -1

|   |            |           |           |
|---|------------|-----------|-----------|
| C | -7.503983  | -1.209700 | 0.959300  |
| C | -8.874189  | -0.924335 | 0.995642  |
| C | -9.402195  | 0.268467  | 1.553390  |
| H | -9.549691  | -1.659289 | 0.564441  |
| C | -8.520550  | 1.203368  | 2.105322  |
| C | -6.631309  | -0.248146 | 1.514289  |
| C | -7.137591  | 0.947965  | 2.095328  |
| H | -8.890624  | 2.129228  | 2.545330  |
| C | -5.985573  | 1.691507  | 2.568851  |
| C | -10.928888 | 0.480166  | 1.534975  |
| C | -11.340033 | 1.815772  | 2.182424  |
| H | -10.905594 | 2.677963  | 1.654359  |
| H | -11.035566 | 1.869814  | 3.238415  |
| H | -12.434775 | 1.918079  | 2.145001  |
| C | -11.620916 | -0.664742 | 2.313107  |
| H | -11.286231 | -0.683542 | 3.361394  |
| H | -11.404492 | -1.647118 | 1.869418  |
| H | -12.713086 | -0.524450 | 2.304466  |
| C | -11.433932 | 0.477638  | 0.072202  |
| H | -12.526361 | 0.615251  | 0.046471  |
| H | -11.201799 | -0.469015 | -0.436662 |
| H | -10.971859 | 1.294621  | -0.502439 |
| N | -5.247693  | -0.251404 | 1.597294  |
| C | -4.846131  | 0.905358  | 2.248349  |
| H | -4.600343  | -1.036105 | 1.347158  |
| C | -5.835590  | 2.928072  | 3.222549  |
| C | -4.557369  | 3.381749  | 3.561853  |
| H | -6.719992  | 3.519508  | 3.458584  |
| C | -3.432524  | 2.580384  | 3.236144  |

C -3.544352 1.345269 2.584133  
H -2.431483 2.922097 3.486475  
C -4.319229 4.725726 4.278235  
C -5.633866 5.472687 4.568584  
H -6.299635 4.890316 5.223147  
H -6.181732 5.712706 3.644860  
H -5.410313 6.421443 5.079019  
C -3.433856 5.634743 3.392054  
H -3.925393 5.841810 2.429190  
H -2.458143 5.172883 3.182897  
H -3.250214 6.596143 3.896772  
C -3.600338 4.475297 5.625485  
H -3.420981 5.430379 6.143579  
H -2.627804 3.982481 5.483085  
H -4.211228 3.838281 6.283002  
N -2.448122 0.515238 2.248387  
H 2.117491 3.999186 -5.117191  
H 10.521636 -1.829461 -3.979882  
H 3.911452 2.789659 -6.509161  
H 11.100272 -2.181379 -2.334074  
C 11.221575 -1.507067 -3.194054  
C 2.838160 4.815571 -4.959386  
H 2.699233 5.542842 -5.772727  
H 12.246870 -1.629612 -3.576240  
C 4.567772 3.658044 -6.348083  
H 4.380533 4.383776 -7.154623  
H 2.587862 5.321707 -4.014738  
C 4.292855 4.309514 -4.971672  
N -6.967249 -2.409307 0.427323  
N 7.488039 -1.232624 0.621480  
C 7.880906 -0.551139 -0.554450

C 9.160696 -0.624238 -1.116706  
C 4.570668 3.283150 -3.855135  
C 6.940167 0.285485 -1.187597  
C 3.571787 2.882134 -2.946034  
C 3.796469 1.955776 -1.912736  
C 5.087738 1.419302 -1.788055  
H 5.609909 3.318484 -6.435758  
N 5.619080 0.552289 -0.838880  
C 5.850455 2.719739 -3.727209  
C 6.107800 1.789631 -2.713688  
C 7.297365 1.051087 -2.325382  
C 9.535627 0.120549 -2.263138  
N 2.708511 1.679723 -1.038879  
C 8.595054 0.968167 -2.858273  
C 10.970776 -0.030659 -2.804228  
H 9.880177 -1.284570 -0.638891  
H 4.965281 -0.074485 -0.347397  
H 10.548240 0.576382 -4.876866  
H 2.566937 3.296899 -3.030154  
H 6.650729 3.001839 -4.413418  
H 8.852036 1.560282 -3.736026  
C 11.219449 0.843828 -4.047002  
H 12.253238 0.699089 -4.394233  
H 11.889258 -0.234458 -0.808290  
C 11.984104 0.386016 -1.710923  
C 5.230008 5.527571 -4.789252  
H 5.048023 6.267064 -5.584280  
H 13.013223 0.277267 -2.087246  
H 11.088621 1.914152 -3.827771  
H 5.053813 6.017254 -3.819391  
H 6.288929 5.235399 -4.835763

H 11.835724 1.436771 -1.418942  
C 8.048827 -2.350783 1.200986  
H 6.707899 -0.820224 1.128229  
C -7.480469 -3.135724 -0.619492  
H -6.092196 -2.772553 0.868263  
O 9.015193 -2.949111 0.706304  
O -8.511430 -2.812109 -1.235557  
C -6.686007 -4.386466 -0.972124  
C 7.384005 -2.786758 2.498930  
C -5.946931 -4.341116 -2.346419  
H -7.398491 -5.227652 -0.986855  
H -5.945441 -4.588265 -0.184280  
C 6.522413 -4.085774 2.408548  
H 6.749694 -1.975778 2.890315  
H 8.190942 -2.951313 3.229987  
C -6.944804 -4.337359 -3.518841  
H -7.599510 -3.456151 -3.483820  
H -7.583004 -5.234770 -3.493754  
H -6.403479 -4.333014 -4.478052  
C -5.044174 -3.096063 -2.427277  
H -4.461893 -3.104710 -3.361623  
H -4.336054 -3.059464 -1.584692  
H -5.635658 -2.167837 -2.410361  
C -5.074919 -5.609163 -2.435848  
H -4.542130 -5.643064 -3.398881  
H -5.690022 -6.519050 -2.356363  
H -4.323858 -5.634811 -1.630911  
C 7.397198 -5.311270 2.086165  
H 7.892958 -5.208937 1.111130  
H 6.776931 -6.220859 2.065151  
H 8.177371 -5.450051 2.850500



C 5.862417 -4.287244 3.787087  
H 6.620996 -4.385821 4.579146  
H 5.250836 -5.202495 3.788634  
H 5.207886 -3.439712 4.042877  
C 5.427249 -3.930015 1.337672  
H 4.791317 -3.054501 1.540352  
H 4.779300 -4.819659 1.322735  
H 5.857058 -3.815286 0.330854  
C -1.113138 0.766333 2.394500  
H -2.688539 -0.410119 1.848393  
C 2.415550 0.552120 -0.330107  
H 1.973570 2.387102 -1.056693  
O -0.623665 1.827969 2.805382  
O 3.166038 -0.429986 -0.207557  
C -0.225742 -0.440434 2.029602  
C 1.013142 0.561954 0.277013  
O 1.062877 -0.061230 1.557442  
H -0.739418 -1.098397 1.305907  
H -0.049974 -1.016812 2.950521  
H 0.361262 -0.012986 -0.409935  
H 0.614586 1.588357 0.347747  
H -1.783612 -4.364459 1.001978  
C -2.386072 -4.198498 1.907480  
H -2.772754 -5.159963 2.264791  
H -1.716216 -3.767241 2.665118  
O -3.179063 -2.041471 1.219914  
C -3.515118 -3.222434 1.592461  
O -4.715436 -3.616155 1.696481

### 3.3.9 Cz-Gly-NeP benzoate complex

157 -1

|   |            |           |           |
|---|------------|-----------|-----------|
| C | -7.769984  | -1.304837 | 0.892932  |
| C | -9.107838  | -0.961058 | 1.126034  |
| C | -9.498961  | 0.235485  | 1.778945  |
| H | -9.867518  | -1.654176 | 0.774156  |
| C | -8.508042  | 1.116287  | 2.221064  |
| C | -6.783216  | -0.396520 | 1.340258  |
| C | -7.153667  | 0.803871  | 2.007213  |
| H | -8.768964  | 2.045443  | 2.727487  |
| C | -5.920431  | 1.495413  | 2.323853  |
| C | -11.002341 | 0.510033  | 1.979205  |
| C | -11.259726 | 1.850062  | 2.693177  |
| H | -10.864736 | 2.701947  | 2.119382  |
| H | -10.809873 | 1.871721  | 3.697019  |
| H | -12.343404 | 2.000355  | 2.809812  |
| C | -11.626299 | -0.619458 | 2.833768  |
| H | -11.152851 | -0.666107 | 3.826288  |
| H | -11.510900 | -1.602441 | 2.354971  |
| H | -12.703266 | -0.438248 | 2.975820  |
| C | -11.708160 | 0.553509  | 0.602589  |
| H | -12.785193 | 0.741276  | 0.733600  |
| H | -11.594482 | -0.394341 | 0.057645  |
| H | -11.293999 | 1.358053  | -0.024211 |
| N | -5.400293  | -0.452520 | 1.232127  |
| C | -4.866488  | 0.679523  | 1.830631  |
| H | -4.825417  | -1.226644 | 0.833035  |
| C | -5.642540  | 2.714064  | 2.967811  |
| C | -4.316284  | 3.123416  | 3.126979  |
| H | -6.466579  | 3.325809  | 3.333695  |
| C | -3.276750  | 2.294961  | 2.631276  |

C -3.516853 1.075920 1.981697  
H -2.240738 2.602914 2.741393  
C -3.936352 4.446068 3.821599  
C -5.174283 5.230541 4.294670  
H -5.765865 4.659451 5.025762  
H -5.832259 5.502973 3.455619  
H -4.851497 6.162765 4.781510  
C -3.146860 5.341415 2.836510  
H -3.754822 5.577786 1.949927  
H -2.222404 4.854194 2.494777  
H -2.867705 6.289063 3.323171  
C -3.053109 4.148051 5.056590  
H -2.772318 5.086696 5.559693  
H -2.126625 3.626430 4.776612  
H -3.592106 3.519277 5.781653  
N -2.496910 0.237255 1.468254  
H 2.795853 4.517094 -5.376102  
H 11.256923 -1.143768 -3.618627  
H 4.798496 3.498329 -6.621510  
H 11.594055 -1.655400 -1.947481  
C 11.806139 -0.883357 -2.700916  
C 3.459540 5.325730 -5.034341  
H 3.406684 6.134779 -5.777965  
H 12.883608 -0.917643 -2.925106  
C 5.398680 4.356480 -6.283150  
H 5.298645 5.159844 -7.029577  
H 3.065546 5.720070 -4.085652  
C 4.919236 4.853804 -4.898287  
N -7.367627 -2.509167 0.266503  
N 7.511853 -1.211356 0.458944  
C 8.044000 -0.375805 -0.550587

C 9.397061 -0.334892 -0.908152  
C 5.078934 3.718844 -3.866960  
C 7.167724 0.500024 -1.222314  
C 3.977595 3.188379 -3.166438  
C 4.091697 2.155457 -2.220021  
C 5.372957 1.640924 -1.967459  
H 6.453379 4.046943 -6.259620  
N 5.797221 0.683505 -1.051121  
C 6.350842 3.181566 -3.610874  
C 6.499656 2.147638 -2.679437  
C 7.652740 1.406512 -2.197438  
C 9.902075 0.556547 -1.887671  
N 2.906201 1.756213 -1.543070  
C 9.019110 1.434411 -2.525174  
C 11.410544 0.527140 -2.202606  
H 10.069385 -1.022411 -0.400874  
H 5.109887 -0.023416 -0.752657  
H 11.281281 1.349416 -4.240083  
H 2.978265 3.583428 -3.351172  
H 7.229086 3.564713 -4.133235  
H 9.374705 2.136757 -3.278424  
C 11.798463 1.547208 -3.289051  
H 12.880303 1.485140 -3.478276  
H 12.013374 0.133076 -0.118123  
C 12.213082 0.857088 -0.921214  
C 5.779847 6.064941 -4.466466  
H 5.679928 6.881083 -5.199160  
H 13.293336 0.835163 -1.133658  
H 11.572690 2.579396 -2.981499  
H 5.458031 6.444852 -3.485180  
H 6.845503 5.803327 -4.398166

H 11.958055 1.859872 -0.546266  
C 8.052908 -2.350957 1.015314  
H 6.625176 -0.909216 0.856038  
C -8.093525 -3.254586 -0.631012  
H -6.439429 -2.890521 0.551227  
O 9.140477 -2.822632 0.653021  
O -9.229653 -2.935124 -1.025014  
C -7.397063 -4.519249 -1.116051  
C 7.202916 -2.981832 2.108365  
C -6.993897 -4.521527 -2.624312  
H -8.092210 -5.356346 -0.940404  
H -6.495698 -4.702027 -0.511558  
C 6.513073 -4.329478 1.723296  
H 6.425929 -2.274878 2.439748  
H 7.867495 -3.160963 2.967719  
C -8.233907 -4.542199 -3.537439  
H -8.857046 -3.651123 -3.386162  
H -8.855019 -5.428642 -3.335212  
H -7.924069 -4.578278 -4.593859  
C -6.130104 -3.288268 -2.949303  
H -5.778032 -3.330993 -3.991497  
H -5.246948 -3.235294 -2.294726  
H -6.699905 -2.354295 -2.826872  
C -6.169887 -5.800773 -2.873609  
H -5.862657 -5.860705 -3.929213  
H -6.758434 -6.701875 -2.640315  
H -5.260992 -5.815977 -2.252917  
C 7.555067 -5.441086 1.500505  
H 8.235637 -5.196972 0.674124  
H 7.047532 -6.389228 1.264163  
H 8.162739 -5.597323 2.405316

C 5.600976 -4.724178 2.901856  
H 6.180560 -4.836517 3.831217  
H 5.102451 -5.683744 2.694858  
H 4.822112 -3.965553 3.073960  
C 5.658291 -4.151980 0.455168  
H 4.907397 -3.357393 0.587642  
H 5.120554 -5.083921 0.223418  
H 6.276531 -3.897849 -0.419220  
C -1.148618 0.465648 1.446752  
H -2.799752 -0.674275 1.082319  
C 2.558798 0.541347 -1.029635  
H 2.159967 2.451349 -1.566482  
O -0.588305 1.491018 1.856135  
O 3.316668 -0.438717 -0.943832  
C -0.340352 -0.715521 0.868392  
C 1.093804 0.462826 -0.602951  
O 0.998850 -0.368836 0.551065  
H -0.863894 -1.135026 -0.009463  
H -0.278402 -1.500526 1.636854  
H 0.528735 0.019599 -1.446628  
H 0.684375 1.467128 -0.404437  
H -0.300300 -7.536065 0.131698  
C -1.007762 -6.712270 0.245484  
C -2.270489 -6.942303 0.806713  
H -2.549112 -7.946977 1.130946  
C -3.175550 -5.887164 0.950243  
H -4.163267 -6.054077 1.381215  
C -2.829653 -4.588112 0.540919  
C -3.821090 -3.451780 0.699541  
O -3.451642 -2.276536 0.347371  
O -4.972837 -3.730966 1.153162

C -1.562707 -4.368173 -0.022907  
H -1.301512 -3.362244 -0.351489  
C -0.656381 -5.422135 -0.171432  
H 0.324770 -5.239320 -0.614085

### 3.3.10 Cz-Gly-NeP lactate complex

154 -1

C -6.528572 -1.049668 1.511459  
C -7.749044 -0.984848 0.828806  
C -8.129366 0.137103 0.050037  
H -8.415774 -1.839106 0.913960  
C -7.252114 1.222581 -0.049606  
C -5.672167 0.065363 1.420773  
C -6.025457 1.191611 0.636342  
H -7.510983 2.097211 -0.645448  
C -4.933133 2.140159 0.767395  
C -9.494973 0.109902 -0.664706  
C -9.757881 1.398408 -1.466661  
H -9.004559 1.552206 -2.253648  
H -9.768192 2.288578 -0.819991  
H -10.741429 1.329306 -1.954772  
C -10.622658 -0.044270 0.383581  
H -10.620301 0.801108 1.088651  
H -10.515036 -0.971514 0.964381  
H -11.603957 -0.070928 -0.115092  
C -9.543064 -1.085985 -1.645334  
H -10.516442 -1.116206 -2.159088  
H -9.407529 -2.045684 -1.126206  
H -8.755389 -0.997840 -2.409197  
N -4.408957 0.256664 1.977074

C -3.979257 1.536000 1.632512  
H -4.078303 -0.118524 2.878839  
C -4.698511 3.408059 0.213989  
C -3.521975 4.097749 0.529217  
H -5.437601 3.842951 -0.458155  
C -2.598440 3.484712 1.407281  
C -2.796349 2.218017 1.974117  
H -1.675371 4.006278 1.666831  
C -3.199720 5.491305 -0.042603  
C -4.325933 6.021919 -0.949027  
H -5.276243 6.124371 -0.403802  
H -4.494882 5.368977 -1.818084  
H -4.049581 7.016836 -1.328271  
C -1.900557 5.414876 -0.879220  
H -2.016942 4.717617 -1.722679  
H -1.047803 5.075274 -0.273994  
H -1.651540 6.407009 -1.286035  
C -3.001756 6.495712 1.117870  
H -2.771861 7.495130 0.717520  
H -2.174011 6.200843 1.778505  
H -3.913799 6.573004 1.728912  
N -1.767646 1.693745 2.804473  
H 1.748560 5.971685 0.303855  
H 6.306681 -0.012276 -6.773246  
H 2.066149 5.798985 -2.245260  
H 7.245231 -1.414553 -6.206333  
C 7.315829 -0.358145 -6.502476  
C 2.757072 6.406787 0.364343  
H 2.656525 7.497994 0.269398  
H 7.950046 -0.301450 -7.400895  
C 3.052245 6.270018 -2.114794



H 2.920924 7.361747 -2.172655  
H 3.164436 6.195707 1.364411  
C 3.674460 5.878146 -0.753585  
N -6.095220 -2.172345 2.255418  
N 5.787353 -2.303831 -1.783655  
C 6.011233 -1.045532 -2.392408  
C 6.807637 -0.851414 -3.530688  
C 3.857767 4.347637 -0.692171  
C 5.400444 0.101495 -1.833160  
C 3.256711 3.566044 0.319573  
C 3.426669 2.176065 0.405163  
C 4.230546 1.551190 -0.565468  
H 3.689351 5.962710 -2.956414  
N 4.565848 0.215483 -0.728378  
C 4.658447 3.706931 -1.650041  
C 4.850311 2.320239 -1.592716  
C 5.601431 1.384665 -2.407766  
C 7.016110 0.421432 -4.120444  
N 2.870543 1.397219 1.455018  
C 6.406058 1.541245 -3.549861  
C 7.912170 0.513977 -5.371590  
H 7.276486 -1.731772 -3.960420  
H 4.279641 -0.575012 -0.116494  
H 7.058205 2.372222 -6.184385  
H 2.634437 4.038904 1.073993  
H 5.140825 4.282391 -2.442485  
H 6.545277 2.535095 -3.974284  
C 8.035108 1.957985 -5.893163  
H 8.681724 1.971469 -6.783007  
H 9.316403 -1.044035 -4.691533  
C 9.332402 0.001528 -5.031066

C 5.054226 6.564906 -0.610084  
H 4.941318 7.659076 -0.658863  
H 9.979441 0.057837 -5.920172  
H 8.484706 2.627231 -5.144003  
H 5.519873 6.311617 0.354822  
H 5.743641 6.260046 -1.410400  
H 9.788627 0.610678 -4.235946  
C 6.269353 -3.537523 -2.164998  
H 5.202654 -2.303920 -0.939100  
C -6.852249 -3.178281 2.817514  
H -5.087413 -2.265070 2.364368  
O 7.028970 -3.703566 -3.133345  
O -8.090643 -3.189813 2.772630  
C -6.043076 -4.270257 3.500412  
C 5.793515 -4.699633 -1.306277  
C -5.880924 -5.592907 2.684160  
H -6.558934 -4.503334 4.444564  
H -5.039276 -3.896904 3.757088  
C 4.755381 -5.645165 -1.991069  
H 5.359609 -4.321874 -0.368413  
H 6.684246 -5.290568 -1.040675  
C -7.244752 -6.264983 2.444303  
H -7.912055 -5.627983 1.847441  
H -7.749759 -6.484523 3.397754  
H -7.106557 -7.216047 1.906788  
C -5.191500 -5.314368 1.335699  
H -5.014219 -6.257792 0.797190  
H -4.216909 -4.821422 1.478853  
H -5.806999 -4.672383 0.687515  
C -4.994166 -6.534033 3.523345  
H -4.854121 -7.493303 3.001943

H -5.453223 -6.743424 4.501959  
H -4.000414 -6.093601 3.698709  
C 5.393872 -6.412099 -3.163407  
H 5.754082 -5.727686 -3.942999  
H 4.655952 -7.094376 -3.613418  
H 6.248542 -7.015601 -2.820094  
C 4.287100 -6.656832 -0.926502  
H 5.137449 -7.225279 -0.520262  
H 3.576254 -7.373670 -1.365911  
H 3.781704 -6.152089 -0.088396  
C 3.543374 -4.839330 -2.494134  
H 3.078655 -4.264153 -1.678187  
H 2.779699 -5.516587 -2.905686  
H 3.826537 -4.133253 -3.289273  
C -1.880251 0.836345 3.846166  
H -0.815661 2.070653 2.615529  
C 1.659667 1.580437 2.040741  
H 3.447723 0.592487 1.800250  
O -2.940456 0.311305 4.250207  
O 0.850510 2.483538 1.755814  
C -0.589304 0.515612 4.606102  
C 1.307815 0.536545 3.106688  
O 0.579776 1.191257 4.154261  
H -0.461401 -0.579873 4.603310  
H -0.754806 0.824910 5.648511  
H 2.211212 0.058264 3.515062  
H 0.692185 -0.240443 2.621522  
O 4.089790 -2.149952 0.750228  
H 3.461325 -2.981743 3.666607  
C 4.242603 -1.898471 1.997371  
H 3.889204 -3.990729 1.282766

C 4.285285 -3.117399 2.942210  
O 4.050924 -4.325438 2.196285  
H 5.760636 -2.303935 4.311701  
C 5.608571 -3.205460 3.702919  
H 5.600108 -4.078867 4.369962  
H 6.451467 -3.308135 3.003674  
O 4.333220 -0.748438 2.511005

### 3.3.11 Cz-Gly-NeP formate complex

147 -1

C -7.691640 -1.358958 1.117452  
C -9.054811 -1.066538 1.248671  
C -9.537094 0.147069 1.802632  
H -9.762112 -1.812953 0.895843  
C -8.614976 1.096735 2.253460  
C -6.777836 -0.380973 1.569256  
C -7.237327 0.836590 2.144099  
H -8.948919 2.038677 2.688279  
C -6.052583 1.592185 2.503021  
C -11.060459 0.364551 1.891182  
C -11.419415 1.724948 2.517357  
H -11.023008 2.564801 1.927015  
H -11.037876 1.815817 3.545514  
H -12.513577 1.831742 2.556881  
C -11.693771 -0.748057 2.760784  
H -11.282833 -0.728236 3.781572  
H -11.511086 -1.747076 2.339869  
H -12.783562 -0.604652 2.827122  
C -11.673779 0.310254 0.471139  
H -12.764290 0.453877 0.522247

H -11.483723 -0.656272 -0.017646  
H -11.253113 1.102029 -0.167334  
N -5.392129 -0.387413 1.555054  
C -4.939807 0.792965 2.124475  
H -4.766297 -1.150454 1.210482  
C -5.856391 2.850013 3.100779  
C -4.557162 3.312216 3.329150  
H -6.721597 3.450293 3.381127  
C -3.459460 2.496432 2.951643  
C -3.616678 1.238207 2.354949  
H -2.443219 2.842927 3.120040  
C -4.267575 4.678555 3.980992  
C -5.557790 5.440926 4.333950  
H -6.177966 4.885033 5.053073  
H -6.167561 5.650349 3.442035  
H -5.297866 6.406173 4.793566  
C -3.442070 5.553144 3.006859  
H -3.996221 5.727521 2.072006  
H -2.482629 5.081429 2.749960  
H -3.224525 6.531010 3.464211  
C -3.459579 4.469586 5.284018  
H -3.242986 5.440230 5.757057  
H -2.500118 3.968004 5.091925  
H -4.025604 3.857114 6.002237  
N -2.541088 0.397755 1.978082  
H 2.439276 4.212028 -5.102582  
H 10.810131 -1.626060 -3.749518  
H 4.339226 3.106591 -6.437432  
H 11.266989 -2.087842 -2.092500  
C 11.443483 -1.353498 -2.891599  
C 3.138608 5.020302 -4.841115

H 3.051517 5.797916 -5.614421  
H 12.496523 -1.439168 -3.201850  
C 4.974612 3.965231 -6.172672  
H 4.839160 4.741529 -6.941708  
H 2.815492 5.463121 -3.886966  
C 4.595330 4.523739 -4.780306  
N -7.199458 -2.580540 0.591604  
N 7.423082 -1.390392 0.627051  
C 7.897920 -0.616761 -0.457658  
C 9.217138 -0.640184 -0.925850  
C 4.801331 3.426906 -3.716354  
C 6.997596 0.259796 -1.096353  
C 3.743425 2.962718 -2.909831  
C 3.901332 1.969597 -1.927518  
C 5.183896 1.427308 -1.748808  
H 6.023285 3.636501 -6.206543  
N 5.652340 0.497746 -0.826157  
C 6.073298 2.860826 -3.534122  
C 6.264774 1.864473 -2.570123  
C 7.429639 1.106007 -2.147742  
C 9.667858 0.189392 -1.983207  
N 2.757540 1.636276 -1.150242  
C 8.764450 1.070622 -2.586227  
C 11.142324 0.089309 -2.420179  
H 9.906258 -1.329732 -0.444886  
H 4.968679 -0.163787 -0.430005  
H 10.871998 0.839149 -4.471693  
H 2.744201 3.380311 -3.036346  
H 6.918539 3.191935 -4.139846  
H 9.078974 1.726337 -3.397562  
C 11.474010 1.051816 -3.575388

H 12.533180 0.940388 -3.850569  
H 11.904005 -0.249429 -0.378165  
C 12.061012 0.435401 -1.223974  
C 5.504504 5.731864 -4.451759  
H 5.373571 6.521259 -5.208432  
H 13.118105 0.363052 -1.523931  
H 11.312218 2.102894 -3.292350  
H 5.253325 6.156528 -3.467957  
H 6.566987 5.449424 -4.439891  
H 11.874941 1.460956 -0.870446  
C 7.979605 -2.513983 1.200590  
H 6.579720 -1.042655 1.077458  
C -7.815719 -3.375643 -0.345604  
H -6.290072 -2.924450 0.966075  
O 9.024487 -3.033246 0.782021  
O -8.905245 -3.089972 -0.872431  
C -7.058782 -4.651830 -0.689996  
C 7.205167 -3.061548 2.390785  
C -6.505461 -4.729096 -2.147696  
H -7.757362 -5.490684 -0.537133  
H -6.220719 -4.785715 0.009840  
C 6.478640 -4.422658 2.149193  
H 6.460335 -2.324678 2.730634  
H 7.929736 -3.191908 3.209931  
C -7.646683 -4.848157 -3.174401  
H -8.313708 -3.976904 -3.131711  
H -8.251945 -5.748515 -2.985401  
H -7.233850 -4.923768 -4.192736  
C -5.650145 -3.487024 -2.461612  
H -5.191035 -3.579923 -3.458038  
H -4.842421 -3.361892 -1.724577

H -6.257460 -2.568794 -2.457861  
C -5.622190 -5.989951 -2.232682  
H -5.223719 -6.112533 -3.251666  
H -6.198919 -6.894352 -1.983258  
H -4.769032 -5.927248 -1.539424  
C 7.490591 -5.559539 1.915661  
H 8.100924 -5.379272 1.020754  
H 6.958640 -6.514985 1.787096  
H 8.171097 -5.663157 2.775150  
C 5.661652 -4.730873 3.419897  
H 6.313867 -4.793863 4.304763  
H 5.139556 -5.694374 3.314535  
H 4.906257 -3.952109 3.606532  
C 5.525653 -4.314931 0.944873  
H 4.792591 -3.505587 1.087192  
H 4.965858 -5.253603 0.814689  
H 6.073186 -4.121282 0.009724  
C -1.198719 0.646923 2.052311  
H -2.791860 -0.543569 1.628029  
C 2.420642 0.464518 -0.540037  
H 2.025207 2.346202 -1.165697  
O -0.685661 1.715320 2.411860  
O 3.162014 -0.527728 -0.441205  
C -0.336621 -0.574167 1.670091  
C 0.986121 0.440671 -0.014645  
O 0.975073 -0.219145 1.249764  
H -0.849276 -1.186717 0.906743  
H -0.206602 -1.191808 2.571550  
H 0.379779 -0.122394 -0.750906  
H 0.571513 1.459401 0.065470  
O -3.369259 -2.153048 0.922295



C -3.637375 -3.302402 1.407452  
O -4.785272 -3.749379 1.676595  
H -2.765374 -3.971440 1.607186

### 3.3.12 Cz-Gly-NeP sorbate complex

158 -1

C -7.235596 -0.981389 0.421950  
C -8.600485 -0.659067 0.424214  
C -9.149079 0.376977 1.223990  
H -9.246935 -1.248422 -0.220402  
C -8.300681 1.120344 2.048350  
C -6.394314 -0.214509 1.264317  
C -6.924805 0.827966 2.071922  
H -8.688358 1.922941 2.675648  
C -5.802039 1.397162 2.790985  
C -10.666752 0.637206 1.149374  
C -11.105876 1.792094 2.068704  
H -10.616390 2.739611 1.797899  
H -10.885718 1.580309 3.126070  
H -12.192336 1.939481 1.977419  
C -11.432861 -0.637611 1.577334  
H -11.182991 -0.915264 2.612513  
H -11.193041 -1.492344 0.928651  
H -12.519285 -0.466139 1.521201  
C -11.060534 1.001269 -0.302503  
H -12.144507 1.184424 -0.367543  
H -10.812581 0.193259 -1.005694  
H -10.538745 1.912093 -0.633791  
N -5.023866 -0.299724 1.460372  
C -4.652350 0.665195 2.381531

H -4.398333 -0.989926 0.973647  
C -5.682910 2.450171 3.715236  
C -4.427842 2.775082 4.240162  
H -6.572831 3.004289 4.012756  
C -3.298959 2.022308 3.827384  
C -3.379138 0.968381 2.910152  
H -2.317792 2.262681 4.231380  
C -4.225056 3.915724 5.257011  
C -5.546402 4.625705 5.606411  
H -6.273966 3.936080 6.060247  
H -6.011824 5.084386 4.721084  
H -5.348768 5.427731 6.332906  
C -3.253639 4.966341 4.667877  
H -3.661024 5.399442 3.741767  
H -2.273048 4.527128 4.434332  
H -3.094401 5.783701 5.388332  
C -3.624031 3.345676 6.564404  
H -3.471451 4.153804 7.296815  
H -2.651629 2.863696 6.388600  
H -4.297749 2.599594 7.012786  
N -2.261749 0.186362 2.520965  
H 1.798058 3.508518 -5.412341  
H 10.709460 -1.468610 -4.091074  
H 3.646460 2.332160 -6.755571  
H 11.348726 -1.642533 -2.438820  
C 11.393658 -1.028561 -3.349540  
C 2.450404 4.392491 -5.349742  
H 2.227619 5.031946 -6.216387  
H 12.417855 -1.091394 -3.748741  
C 4.232270 3.261417 -6.693403  
H 3.963670 3.895201 -7.552789

H 2.184111 4.957035 -4.443290  
C 3.941715 4.008599 -5.369707  
N -6.658743 -2.006100 -0.364430  
N 7.730713 -0.792102 0.532709  
C 8.039458 -0.162431 -0.695982  
C 9.307489 -0.170987 -1.289479  
C 4.335897 3.110525 -4.179876  
C 7.017457 0.547220 -1.358918  
C 3.397576 2.703276 -3.211100  
C 3.726187 1.887978 -2.114008  
C 5.061545 1.473479 -1.987548  
H 5.296357 3.000737 -6.787158  
N 5.687537 0.732114 -0.990665  
C 5.662943 2.671010 -4.045959  
C 6.023991 1.852532 -2.969677  
C 7.281326 1.249256 -2.561456  
C 9.591001 0.516016 -2.496824  
N 2.687247 1.594590 -1.187516  
C 8.568763 1.235085 -3.124915  
C 11.022537 0.446499 -3.064357  
H 10.091094 -0.733023 -0.787683  
H 5.099500 0.095354 -0.433010  
H 10.503692 0.854997 -5.163847  
H 2.358793 3.022887 -3.297820  
H 6.419209 2.962327 -4.776757  
H 8.754077 1.778143 -4.051105  
C 11.167825 1.240627 -4.375790  
H 12.202246 1.156316 -4.740877  
H 11.992996 0.477278 -1.084465  
C 12.017549 1.031492 -2.033307  
C 4.777051 5.310843 -5.326540

H 4.510480 5.959266 -6.175197  
H 13.044591 0.981484 -2.427221  
H 10.950934 2.309796 -4.233102  
H 4.587653 5.868120 -4.396655  
H 5.854926 5.103168 -5.385660  
H 11.784713 2.085645 -1.818413  
C 8.424123 -1.781973 1.196846  
H 6.916027 -0.426340 1.020604  
C -7.273669 -2.850903 -1.259529  
H -5.644522 -2.164100 -0.248908  
O 9.456442 -2.297032 0.743867  
O -8.497840 -2.849443 -1.478012  
C -6.324605 -3.797684 -1.981556  
C 7.816315 -2.189215 2.531095  
C -6.054942 -3.452472 -3.481436  
H -6.770680 -4.803282 -1.929784  
H -5.357090 -3.827108 -1.457936  
C 7.149902 -3.601374 2.559785  
H 7.069780 -1.445299 2.850950  
H 8.631552 -2.170685 3.271687  
C -7.336702 -3.582923 -4.324666  
H -8.115256 -2.885987 -3.986391  
H -7.746582 -4.603272 -4.263546  
H -7.114713 -3.368880 -5.381905  
C -5.488170 -2.026111 -3.609211  
H -5.209873 -1.817546 -4.653763  
H -4.590474 -1.899561 -2.985042  
H -6.225523 -1.268292 -3.303145  
C -5.010887 -4.462428 -3.998271  
H -4.795625 -4.281218 -5.062775  
H -5.375424 -5.496508 -3.897338

H -4.064488 -4.377524 -3.442003  
C 8.195994 -4.712894 2.357406  
H 8.689321 -4.630732 1.379484  
H 7.712520 -5.700101 2.420441  
H 8.975305 -4.666159 3.134324  
C 6.502416 -3.767584 3.948819  
H 7.253512 -3.678976 4.749173  
H 6.030317 -4.758348 4.034654  
H 5.727788 -3.004747 4.121431  
C 6.061895 -3.703308 1.475006  
H 5.300808 -2.917001 1.597797  
H 5.551091 -4.676141 1.536633  
H 6.486674 -3.613892 0.463359  
C -0.967503 0.612382 2.440335  
H -2.439815 -0.822421 2.277598  
C 2.509208 0.508849 -0.382035  
H 1.894694 2.234985 -1.237628  
O -0.582375 1.776957 2.620712  
O 3.344301 -0.393879 -0.205995  
C 0.028030 -0.523292 2.126704  
C 1.127277 0.453166 0.267923  
O 1.261434 -0.057483 1.591020  
H -0.437703 -1.275790 1.466854  
H 0.280369 -1.021490 3.075062  
H 0.509105 -0.227491 -0.350326  
H 0.644762 1.444838 0.271216  
C -1.685648 -6.620001 0.868853  
C -0.870847 -7.419171 1.595949  
C -0.547093 -8.841208 1.273221  
C -1.973713 -5.246272 1.216810  
C -2.782200 -4.420997 0.509292

C -3.050905 -3.006094 0.894213  
O -3.794296 -2.320111 0.095948  
H -1.053250 -9.180810 0.358973  
H -0.837377 -9.507629 2.102832  
H 0.539854 -8.975878 1.142584  
H -2.160328 -7.020507 -0.035032  
H -0.404129 -7.002892 2.496926  
H -1.501234 -4.845104 2.120866  
H -3.270212 -4.775108 -0.403124  
O -2.542272 -2.539713 1.962924

### 3.3.13 CzU-Py free receptor

118 0

C -5.081711 -1.353948 2.125626  
C -6.266159 -1.296779 2.881388  
C -6.931709 -0.085618 3.192852  
H -6.664961 -2.234967 3.271842  
C -6.386438 1.121304 2.733431  
C -4.551722 -0.117787 1.699151  
C -5.193134 1.113197 1.988611  
H -6.867857 2.071447 2.962553  
C -4.366187 2.154184 1.404168  
C -8.218125 -0.138878 4.041657  
C -8.817810 1.259383 4.281682  
H -9.089661 1.755611 3.337907  
H -8.124428 1.914720 4.829888  
H -9.733593 1.165244 4.884089  
C -7.903987 -0.772000 5.418598  
H -7.155956 -0.175606 5.962540  
H -7.515272 -1.795617 5.318149

H -8.817783 -0.817952 6.031188  
C -9.280599 -1.000412 3.317450  
H -10.203201 -1.047424 3.916338  
H -8.929820 -2.030347 3.158500  
H -9.531293 -0.571076 2.335482  
N -3.407872 0.124466 0.956529  
C -3.265385 1.498006 0.791010  
H -2.721492 -0.593482 0.745069  
C -4.462705 3.556899 1.371004  
C -3.471231 4.303097 0.727223  
H -5.309954 4.045835 1.850646  
C -2.390861 3.624775 0.107328  
C -2.263115 2.230486 0.121047  
H -1.615186 4.192411 -0.400049  
C -3.510610 5.842647 0.656027  
C -4.744232 6.426939 1.369158  
H -4.760913 6.166551 2.438004  
H -5.683713 6.077925 0.914690  
H -4.724126 7.524202 1.292778  
C -3.551659 6.292762 -0.823975  
H -4.449156 5.902092 -1.327201  
H -2.670191 5.943407 -1.380265  
H -3.575264 7.392098 -0.886308  
C -2.244216 6.423743 1.329187  
H -2.259471 7.523700 1.281146  
H -1.325505 6.077374 0.834419  
H -2.192472 6.127615 2.387934  
N -1.219666 1.519203 -0.510267  
C 0.030201 1.999292 -0.875900  
H -1.417975 0.547067 -0.734877  
O 0.399826 3.166299 -0.701247

H 1.763361 4.178033 -4.977943  
H 8.442915 -1.947217 -4.157379  
H 3.402232 2.699673 -6.294165  
H 8.032335 -3.659931 -3.897056  
C 8.687742 -2.840380 -3.564766  
C 2.630795 4.693603 -4.539557  
H 2.876352 5.545177 -5.191235  
H 9.728298 -3.120545 -3.791303  
C 4.224259 3.283975 -5.853174  
H 5.125147 2.654046 -5.848063  
H 2.333255 5.098660 -3.560613  
C 3.855535 3.766560 -4.429860  
N -4.356834 -2.514441 1.818012  
N 4.072784 -3.244941 0.320857  
C 4.908952 -2.574998 -0.582957  
C 6.244307 -2.924563 -0.877385  
C 3.592330 2.545795 -3.524874  
C 4.413764 -1.410663 -1.201045  
C 2.348348 2.346651 -2.887768  
C 2.091589 1.248781 -2.053398  
C 3.126630 0.322032 -1.858331  
H 4.420682 4.147031 -6.508273  
N 3.154766 -0.839322 -1.097656  
C 4.607602 1.593874 -3.332613  
C 4.384081 0.483844 -2.508492  
C 5.210304 -0.637024 -2.087607  
C 7.061199 -2.180656 -1.755554  
N 0.830553 1.021495 -1.447412  
C 6.527205 -1.030144 -2.363753  
C 8.522255 -2.582458 -2.047729  
H 6.661488 -3.791118 -0.365198



H 2.451763 -1.137913 -0.428095  
H 9.250549 -0.504960 -2.166308  
H 1.542192 3.061118 -3.036147  
H 5.577935 1.714627 -3.817747  
H 7.138947 -0.427621 -3.037514  
C 9.468937 -1.434731 -1.621591  
H 10.515471 -1.708280 -1.828630  
H 8.888802 -3.729764 -0.204173  
C 8.945486 -3.858103 -1.295613  
C 5.032475 4.588207 -3.851240  
H 5.237781 5.460752 -4.490980  
H 9.988564 -4.099815 -1.547703  
H 9.375401 -1.228712 -0.544531  
H 4.796175 4.952971 -2.840040  
H 5.953432 3.990621 -3.791001  
H 8.326500 -4.723819 -1.575421  
H 0.475896 0.067311 -1.477382  
C -4.968555 -3.655987 1.699877  
C 4.203431 -4.525776 0.507884  
C 3.439786 -5.236313 1.489429  
H 4.899279 -5.140264 -0.086872  
C -4.263005 -4.879536 1.461954  
H -6.065720 -3.747125 1.760123  
N 2.533455 -4.621694 2.336829  
C 3.431554 -6.605115 1.804973  
C 2.503978 -6.796723 2.854819  
C 1.962861 -5.547478 3.162383  
N -2.885005 -4.949627 1.345561  
C -2.500240 -6.239882 1.116225  
C -4.754220 -6.185484 1.302431  
C -3.645474 -7.036601 1.087240

H -5.802494 -6.469305 1.343486  
H 4.037969 -7.363564 1.316676  
H 1.224066 -5.257018 3.902875  
H 2.248452 -7.733777 3.341010  
H -3.664807 -8.110599 0.926601  
H -1.454614 -6.499901 0.984874  
H 2.340300 -3.623464 2.331357  
H -2.273225 -4.139625 1.404494

### 3.3.14 CzU-Py acetate complex

125 -1

C -5.303742 -1.177871 1.811742  
C -6.524476 -1.110636 2.506158  
C -7.114201 0.105057 2.933503  
H -7.054776 -2.049202 2.678578  
C -6.452047 1.305794 2.648754  
C -4.662016 0.051483 1.537723  
C -5.227827 1.285647 1.954757  
H -6.878300 2.261653 2.952634  
C -4.312338 2.322895 1.520909  
C -8.466232 0.059879 3.673473  
C -8.951116 1.461642 4.088597  
H -9.112658 2.114368 3.217572  
H -8.237931 1.957773 4.764109  
H -9.909753 1.373985 4.621294  
C -8.327845 -0.799192 4.953614  
H -7.575718 -0.370830 5.633691  
H -8.026620 -1.831069 4.721978  
H -9.289606 -0.841399 5.488095  
C -9.539521 -0.569753 2.753428

H -10.508528 -0.615313 3.274775  
H -9.269597 -1.593001 2.454832  
H -9.670376 0.028152 1.838709  
N -3.463378 0.289582 0.888950  
C -3.232281 1.662629 0.874072  
H -2.810896 -0.433976 0.550784  
C -4.333969 3.725546 1.634688  
C -3.277176 4.471753 1.108279  
H -5.174481 4.210137 2.130642  
C -2.202422 3.794824 0.476853  
C -2.142657 2.398588 0.344023  
H -1.378263 4.366162 0.058233  
C -3.232645 6.011051 1.185117  
C -4.459131 6.593812 1.911627  
H -4.527234 6.235900 2.949985  
H -5.398402 6.340209 1.397175  
H -4.380627 7.690619 1.940770  
C -3.196271 6.598546 -0.246269  
H -4.094262 6.306825 -0.812142  
H -2.315138 6.251505 -0.805012  
H -3.159092 7.698411 -0.206023  
C -1.964006 6.458865 1.949679  
H -1.922409 7.557832 2.006648  
H -1.046224 6.112679 1.453290  
H -1.965644 6.062416 2.976304  
N -1.073818 1.697650 -0.243698  
C 0.016277 2.238005 -0.913608  
H -1.102739 0.654431 -0.183916  
O 0.093650 3.422658 -1.281074  
H 1.495497 4.033836 -5.075583  
H 8.223001 -1.966892 -4.500907

H 2.977649 2.420628 -6.421668  
H 7.835736 -3.656827 -4.096698  
C 8.529298 -2.827858 -3.889142  
C 2.406910 4.586397 -4.801333  
H 2.569463 5.361480 -5.565101  
H 9.535758 -3.132806 -4.216163  
C 3.843378 3.039117 -6.139190  
H 4.739952 2.404027 -6.173003  
H 2.226438 5.096501 -3.843137  
C 3.639153 3.665244 -4.738716  
N -4.739367 -2.361320 1.314094  
N 4.425842 -2.928023 0.554215  
C 5.125556 -2.324454 -0.499701  
C 6.409042 -2.718118 -0.935131  
C 3.489130 2.543281 -3.689797  
C 4.561882 -1.191894 -1.124465  
C 2.330338 2.431784 -2.889274  
C 2.161459 1.430527 -1.914379  
C 3.214591 0.499388 -1.766786  
H 3.961773 3.829856 -6.896797  
N 3.341250 -0.581268 -0.895627  
C 4.523623 1.612553 -3.520279  
C 4.388951 0.593516 -2.566570  
C 5.254614 -0.498469 -2.155617  
C 7.123974 -2.042040 -1.947574  
N 1.008315 1.289416 -1.120595  
C 6.528549 -0.924615 -2.558264  
C 8.538684 -2.481831 -2.380836  
H 6.873971 -3.558398 -0.420224  
H 2.592773 -0.954899 -0.292239  
H 9.266021 -0.425889 -2.701195

H 1.526477 3.152421 -2.999389  
H 5.433758 1.672225 -4.120058  
H 7.058542 -0.374523 -3.338168  
C 9.537839 -1.326522 -2.131984  
H 10.551888 -1.626820 -2.439631  
H 9.101935 -3.528843 -0.526658  
C 9.034461 -3.719106 -1.608461  
C 4.871766 4.533591 -4.388138  
H 4.996494 5.337004 -5.131077  
H 10.040619 -3.989730 -1.961437  
H 9.568724 -1.058322 -1.065034  
H 4.753922 4.998511 -3.397200  
H 5.795988 3.938180 -4.376305  
H 8.380703 -4.590165 -1.766158  
H 0.930592 0.414830 -0.551625  
C -4.838081 -3.461318 1.998529  
C 4.519118 -4.209294 0.749281  
C 3.914366 -4.855436 1.877170  
H 5.057389 -4.873302 0.051917  
C -4.389558 -4.723890 1.488912  
H -5.263396 -3.482547 3.016025  
N 3.223681 -4.167537 2.860030  
C 3.883673 -6.213818 2.230060  
C 3.160205 -6.325181 3.441245  
C 2.762980 -5.038538 3.806332  
N -3.867959 -4.884102 0.216663  
C -3.534300 -6.192076 0.008395  
C -4.382249 -5.989426 2.096783  
C -3.844256 -6.908514 1.165149  
H -4.731928 -6.202464 3.103717  
H 4.340837 -7.019144 1.660972

H 2.194395 -4.686388 4.661446  
H 2.945987 -7.234683 3.995207  
H -3.694815 -7.974951 1.307880  
H -3.107982 -6.517621 -0.935466  
H 3.092594 -3.159278 2.856085  
H -3.759801 -4.123209 -0.449016  
H 0.577877 -3.436935 1.313764  
C -0.233978 -3.162797 0.630463  
H -1.206594 -3.438055 1.056752  
C -0.192377 -1.679991 0.294531  
O -1.259372 -1.130381 -0.138971  
H -0.105315 -3.735926 -0.300981  
O 0.910487 -1.054620 0.431836

### 3.3.15 CzU-Py benzoate complex

132 -1

C 4.923985 3.407918 -0.474636  
C 3.695205 3.467778 0.208024  
C 3.038371 4.680459 0.529852  
H 3.217004 2.522876 0.472635  
C 3.638482 5.888386 0.150297  
C 5.482753 4.642631 -0.877018  
C 4.856693 5.876122 -0.552857  
H 3.164593 6.841939 0.382011  
C 5.708919 6.921250 -1.086104  
C 1.687693 4.625334 1.272177  
C 1.116942 6.028602 1.550450  
H 0.927078 6.584943 0.620259  
H 1.791755 6.628087 2.179750  
H 0.159385 5.934474 2.084100

C 1.869769 3.902204 2.628541  
H 2.591505 4.437568 3.263942  
H 2.232184 2.872553 2.496249  
H 0.909451 3.854654 3.165084  
C 0.659169 3.847485 0.416608  
H -0.309313 3.798080 0.938274  
H 0.988952 2.816852 0.220938  
H 0.500948 4.343676 -0.553138  
N 6.665214 4.890430 -1.552365  
C 6.807997 6.267123 -1.704556  
H 7.238439 4.177960 -2.025918  
C 5.626435 8.326040 -1.068740  
C 6.635498 9.078791 -1.673230  
H 4.777387 8.807089 -0.584019  
C 7.723252 8.407670 -2.289626  
C 7.846079 7.009891 -2.319356  
H 8.516221 8.981561 -2.760627  
C 6.614737 10.620325 -1.698282  
C 5.371736 11.197654 -0.995641  
H 5.329621 10.908081 0.065009  
H 4.439084 10.869878 -1.479273  
H 5.403226 12.296392 -1.041011  
C 6.612027 11.115849 -3.164206  
H 5.721778 10.751123 -3.699091  
H 7.501711 10.772353 -3.711088  
H 6.602088 12.216828 -3.194118  
C 7.871184 11.168026 -0.979874  
H 7.868889 12.269132 -0.995257  
H 8.797134 10.825787 -1.463817  
H 7.895467 10.840164 0.070471  
N 8.917770 6.306443 -2.903279

C 10.097491 6.835760 -3.406007  
H 8.790480 5.277922 -3.004701  
O 10.329535 8.051098 -3.509369  
H 11.930337 9.075787 -7.252871  
H 18.465657 2.840502 -6.867499  
H 13.503859 7.612100 -8.664639  
H 18.010506 1.122660 -6.757455  
C 18.688516 1.892110 -6.357720  
C 12.821213 9.550590 -6.815576  
H 13.077824 10.418832 -7.440884  
H 19.720507 1.606140 -6.614424  
C 14.349937 8.154339 -8.215427  
H 15.232124 7.499425 -8.253271  
H 12.555547 9.926696 -5.816249  
C 14.020502 8.585773 -6.766199  
N 5.602095 2.229315 -0.819729  
N 14.114722 1.281697 -2.440094  
C 14.935829 2.003109 -3.317224  
C 16.257290 1.642616 -3.661269  
C 13.740810 7.334392 -5.908253  
C 14.459087 3.227759 -3.831167  
C 12.506478 7.153250 -5.245795  
C 12.220711 6.032626 -4.444054  
C 13.222085 5.041894 -4.349389  
H 14.559171 9.038348 -8.838171  
N 13.234710 3.845425 -3.632368  
C 14.731660 6.351012 -5.775320  
C 14.475183 5.208973 -5.004000  
C 15.270494 4.039732 -4.671515  
C 17.086086 2.431264 -4.486635  
N 10.992083 5.840127 -3.781983



C 16.574571 3.638941 -4.993596  
C 18.534709 2.018642 -4.823004  
H 16.656874 0.728958 -3.222424  
H 12.396445 3.382128 -3.251406  
H 19.316797 4.078715 -4.759401  
H 11.736489 7.914030 -5.324491  
H 15.700791 6.464608 -6.264483  
H 17.193579 4.278504 -5.625819  
C 19.513784 3.098233 -4.302253  
H 20.551886 2.817581 -4.540332  
H 18.876730 0.702733 -3.090597  
C 18.926868 0.670400 -4.189474  
C 15.230167 9.351427 -6.178380  
H 15.448023 10.244591 -6.785147  
H 19.962506 0.424935 -4.467211  
H 19.430514 3.208817 -3.210426  
H 15.022933 9.679726 -5.148415  
H 16.134983 8.727048 -6.160765  
H 18.284072 -0.150716 -4.541444  
H 10.807856 4.885184 -3.409633  
C 5.474651 1.169878 -0.076727  
C 14.232833 -0.010096 -2.343559  
C 13.504216 -0.770061 -1.372442  
H 14.891634 -0.594983 -3.006825  
C 6.083038 -0.081878 -0.415120  
H 4.907666 1.176630 0.869268  
N 12.648414 -0.193313 -0.449740  
C 13.495080 -2.153250 -1.129981  
C 12.617919 -2.391750 -0.046373  
C 12.106309 -1.156218 0.352193  
N 6.847081 -0.271492 -1.554628

C 7.296819 -1.560604 -1.607007  
C 6.053757 -1.309337 0.266041  
C 6.814944 -2.234838 -0.485306  
H 5.531726 -1.493597 1.201458  
H 14.068532 -2.890065 -1.686458  
H 11.403872 -0.899234 1.138780  
H 12.375633 -3.351003 0.401976  
H 7.002122 -3.277452 -0.245316  
H 7.922760 -1.902236 -2.425240  
H 12.463856 0.805277 -0.399403  
H 7.042795 0.461152 -2.234501  
C 8.125773 -0.241934 -5.232716  
C 9.203101 -1.132079 -5.130755  
H 7.224439 -0.534193 -5.774646  
C 8.206060 1.023427 -4.642766  
H 9.141266 -2.120542 -5.589953  
C 10.358337 -0.751691 -4.435811  
H 7.375369 1.726948 -4.718021  
C 9.365833 1.414090 -3.949478  
C 10.442102 0.516563 -3.854013  
C 9.459940 2.797814 -3.343433  
O 10.587088 3.187712 -2.892350  
O 8.405987 3.513505 -3.333797  
H 11.339939 0.825526 -3.317032  
H 11.196216 -1.445929 -4.351322

### 3.3.16 CzU-Py lactate complex

129 -1

C -5.464040 -1.071161 1.562070  
C -6.688013 -0.968617 2.247003

C -7.188813 0.248079 2.773151  
H -7.293244 -1.873274 2.330676  
C -6.431749 1.413860 2.600857  
C -4.725211 0.123567 1.404516  
C -5.201054 1.357798 1.920753  
H -6.788847 2.370337 2.982140  
C -4.202467 2.354196 1.584496  
C -8.552083 0.245548 3.494105  
C -8.937167 1.641544 4.018765  
H -9.034643 2.373838 3.203156  
H -8.200138 2.024637 4.740651  
H -9.908511 1.583840 4.532032  
C -8.498003 -0.723226 4.700103  
H -7.727328 -0.409478 5.420418  
H -8.270307 -1.751969 4.385669  
H -9.468670 -0.737510 5.219991  
C -9.655700 -0.223742 2.515672  
H -10.633468 -0.234012 3.022316  
H -9.461465 -1.238569 2.139395  
H -9.724976 0.452543 1.650185  
N -3.505929 0.322939 0.780555  
C -3.167267 1.669497 0.891461  
H -2.880112 -0.425064 0.449133  
C -4.118968 3.739894 1.814651  
C -3.002191 4.444792 1.359111  
H -4.926072 4.244824 2.344618  
C -1.977117 3.743162 0.674680  
C -2.026235 2.364203 0.419093  
H -1.108861 4.283913 0.306992  
C -2.838210 5.962846 1.573539  
C -4.026648 6.575332 2.337849

H -4.139289 6.134095 3.339886  
H -4.974607 6.444499 1.794378  
H -3.862343 7.655591 2.465741  
C -2.730607 6.671727 0.201851  
H -3.639252 6.506174 -0.396387  
H -1.870876 6.305857 -0.377933  
H -2.605465 7.756663 0.342933  
C -1.550981 6.236521 2.388098  
H -1.422202 7.319262 2.543874  
H -0.655637 5.862203 1.871630  
H -1.602229 5.751948 3.374822  
N -1.013393 1.640775 -0.237810  
C 0.045813 2.162724 -0.967314  
H -1.080513 0.598995 -0.204499  
O 0.151721 3.357162 -1.289023  
H 1.266902 3.845383 -5.332707  
H 8.248740 -1.870582 -4.697618  
H 2.802469 2.270947 -6.661876  
H 7.916608 -3.551908 -4.216193  
C 8.594831 -2.698889 -4.062462  
C 2.154988 4.446380 -5.085265  
H 2.270065 5.209656 -5.869523  
H 9.598487 -2.992468 -4.407995  
C 3.642785 2.934867 -6.407629  
H 4.566985 2.340652 -6.439659  
H 1.964259 4.970582 -4.136783  
C 3.429974 3.585624 -5.019746  
N -4.981874 -2.243291 0.962590  
N 4.547682 -2.807328 0.409248  
C 5.268809 -2.181936 -0.614527  
C 6.561036 -2.539740 -1.053093

C 3.348120 2.484279 -3.941849  
C 4.635814 -1.126235 -1.301545  
C 2.206387 2.334312 -3.123024  
C 2.104329 1.350827 -2.122482  
C 3.198872 0.472985 -1.974374  
H 3.713953 3.711331 -7.185790  
N 3.391409 -0.567846 -1.069472  
C 4.430908 1.610682 -3.764007  
C 4.359556 0.605096 -2.789706  
C 5.287759 -0.424740 -2.351746  
C 7.228494 -1.874266 -2.105065  
N 0.975269 1.183535 -1.296533  
C 6.579337 -0.803812 -2.746764  
C 8.639880 -2.293152 -2.569712  
H 7.040654 -3.387862 -0.565346  
H 2.665706 -0.994810 -0.479399  
H 9.293513 -0.229734 -2.988179  
H 1.366616 3.012376 -3.238455  
H 5.330700 1.705874 -4.374876  
H 7.072486 -0.269583 -3.561082  
C 9.611413 -1.100838 -2.397465  
H 10.622802 -1.383149 -2.729925  
H 9.286471 -3.250041 -0.694635  
C 9.196473 -3.483922 -1.766180  
C 4.625459 4.519118 -4.710003  
H 4.700998 5.309007 -5.473992  
H 10.201089 -3.736032 -2.137060  
H 9.670924 -0.793307 -1.342382  
H 4.500567 5.002587 -3.728975  
H 5.576875 3.968362 -4.699102  
H 8.567885 -4.380948 -1.872555

H 0.905849 0.283796 -0.775789  
C -5.201777 -3.396579 1.519353  
C 5.162258 -3.333782 1.425025  
C 4.459074 -4.014129 2.472702  
H 6.256162 -3.265563 1.556052  
C -4.835267 -4.631345 0.890939  
H -5.673038 -3.489508 2.512400  
N 3.083491 -4.176832 2.492241  
C 4.965303 -4.609438 3.640651  
C 3.868526 -5.135927 4.361602  
C 2.718728 -4.850698 3.623098  
N -4.258414 -4.698325 -0.365734  
C -4.026306 -6.000703 -0.705844  
C -4.969211 -5.950944 1.350604  
C -4.460242 -6.807889 0.346492  
H -5.391717 -6.240168 2.309452  
H 6.015260 -4.646999 3.920008  
H 1.677193 -5.080738 3.826712  
H 3.898761 -5.663036 5.311043  
H -4.409424 -7.892595 0.374377  
H -3.576495 -6.258368 -1.659732  
H 2.426033 -3.855001 1.764875  
H -4.053013 -3.882475 -0.936642  
O 0.806321 -3.939622 0.686081  
C -0.440701 -3.205523 0.743628  
C -1.005249 -3.164455 2.168092  
C -0.233605 -1.777582 0.207160  
O -1.295520 -1.169006 -0.150442  
H -1.169681 -3.690215 0.074121  
O 0.927981 -1.277952 0.172830  
H -1.964873 -2.631013 2.182346

H -0.304448 -2.655353 2.845574  
H -1.174803 -4.185236 2.539870  
H 0.572372 -4.883348 0.761676

### 3.3.17 CzU-Py formate complex

122 -1

C -5.225596 -1.267213 1.972790  
C -6.456412 -1.205049 2.649665  
C -7.085658 0.012253 3.011111  
H -6.960146 -2.148530 2.868446  
C -6.456076 1.218647 2.676625  
C -4.624470 -0.032581 1.639186  
C -5.226565 1.203724 1.992092  
H -6.913649 2.173836 2.933110  
C -4.337693 2.243051 1.508945  
C -8.443898 -0.036970 3.739900  
C -8.977796 1.368320 4.075222  
H -9.148279 1.968667 3.168947  
H -8.289769 1.921944 4.731713  
H -9.940100 1.277895 4.600878  
C -8.293154 -0.822750 5.065007  
H -7.562392 -0.335500 5.728362  
H -7.957735 -1.855430 4.891218  
H -9.258989 -0.866834 5.591854  
C -9.486369 -0.748039 2.844095  
H -10.459360 -0.796474 3.357546  
H -9.181504 -1.776658 2.602918  
H -9.625221 -0.203846 1.897479  
N -3.430866 0.205466 0.983602  
C -3.239577 1.580958 0.893893

H -2.784050 -0.521462 0.645020  
C -4.393580 3.648280 1.557903  
C -3.354815 4.394726 0.997426  
H -5.245850 4.134553 2.031598  
C -2.264490 3.716543 0.394453  
C -2.170327 2.317661 0.325764  
H -1.455154 4.288110 -0.051034  
C -3.345752 5.936541 1.006721  
C -4.587400 6.522080 1.704824  
H -4.650613 6.208317 2.757593  
H -5.519156 6.224787 1.200215  
H -4.533718 7.620664 1.686159  
C -3.318351 6.462385 -0.448412  
H -4.207736 6.126100 -1.003059  
H -2.427728 6.112305 -0.989794  
H -3.306543 7.563674 -0.455725  
C -2.089900 6.445715 1.753937  
H -2.073599 7.546751 1.763905  
H -1.163060 6.099534 1.274611  
H -2.085382 6.093623 2.796631  
N -1.087700 1.615201 -0.238594  
C 0.007854 2.154298 -0.901165  
H -1.116353 0.576673 -0.172179  
O 0.087423 3.339111 -1.264899  
H 1.597157 4.094588 -4.949440  
H 8.261407 -2.000799 -4.469206  
H 3.093189 2.519532 -6.326836  
H 7.846101 -3.702461 -4.150496  
C 8.541045 -2.890704 -3.886869  
C 2.507692 4.626772 -4.635224  
H 2.693579 5.429128 -5.364678



H 9.553782 -3.192115 -4.197307  
C 3.957810 3.118918 -6.002781  
H 4.849938 2.477977 -6.043652  
H 2.311881 5.101167 -3.661812  
C 3.729774 3.691459 -4.583148  
N -4.591631 -2.443448 1.549560  
N 4.270024 -3.152502 0.386044  
C 5.039159 -2.504542 -0.589407  
C 6.332847 -2.891594 -0.999681  
C 3.547071 2.530461 -3.583040  
C 4.514982 -1.330045 -1.168424  
C 2.371650 2.401979 -2.809407  
C 2.171392 1.363914 -1.879964  
C 3.208105 0.411825 -1.755269  
H 4.097749 3.937655 -6.726131  
N 3.297354 -0.715451 -0.942178  
C 4.567469 1.581479 -3.431660  
C 4.401444 0.525311 -2.524737  
C 5.243020 -0.597087 -2.146012  
C 7.086152 -2.175188 -1.954642  
N 1.003466 1.207862 -1.107843  
C 6.522267 -1.022722 -2.531125  
C 8.509048 -2.610307 -2.365246  
H 6.771733 -3.765330 -0.518928  
H 2.556910 -1.078659 -0.325641  
H 9.264232 -0.549886 -2.574625  
H 1.579972 3.137657 -2.904274  
H 5.490066 1.654526 -4.010441  
H 7.082335 -0.445585 -3.269316  
C 9.510711 -1.477037 -2.037349  
H 10.530599 -1.774212 -2.328172

H 9.006333 -3.742359 -0.542688  
C 8.970840 -3.884697 -1.633311  
C 4.962539 4.532748 -4.172756  
H 5.110867 5.363008 -4.880916  
H 9.985223 -4.148863 -1.966978  
H 9.512464 -1.255375 -0.959339  
H 4.827666 4.960209 -3.167177  
H 5.880696 3.927890 -4.164404  
H 8.315650 -4.742025 -1.849372  
H 0.926025 0.333763 -0.546812  
C -4.702720 -3.536642 2.242925  
C 4.377992 -4.434154 0.571961  
C 3.652657 -5.109085 1.608333  
H 5.013465 -5.075016 -0.061837  
C -4.132629 -4.774785 1.799416  
H -5.223458 -3.570686 3.214535  
N 2.791134 -4.452561 2.470430  
C 3.638300 -6.465724 1.969459  
C 2.752291 -6.607592 3.063934  
C 2.240200 -5.341371 3.349515  
N -3.431531 -4.895885 0.611695  
C -3.005261 -6.183354 0.448699  
C -4.144188 -6.043995 2.399545  
C -3.437142 -6.925848 1.548335  
H -4.619746 -6.284688 3.346878  
H 4.214745 -7.249329 1.484604  
H 1.531098 -5.015923 4.104397  
H 2.505485 -7.523794 3.592681  
H -3.254759 -7.984769 1.707611  
H -2.431081 -6.476607 -0.424686  
H 2.601417 -3.454411 2.421321

|   |           |           |           |
|---|-----------|-----------|-----------|
| H | -3.261485 | -4.118847 | -0.022326 |
| C | -0.207081 | -1.763778 | 0.368046  |
| O | -1.270848 | -1.254500 | -0.098353 |
| O | 0.906989  | -1.171840 | 0.487011  |
| H | -0.256587 | -2.826671 | 0.702522  |

### 3.3.18 CzU-Py sorbate complex

133 -1

|   |            |           |          |
|---|------------|-----------|----------|
| C | -4.910735  | -0.763919 | 2.350136 |
| C | -6.180998  | -0.733039 | 2.953958 |
| C | -6.892612  | 0.463576  | 3.214395 |
| H | -6.644122  | -1.688972 | 3.205754 |
| C | -6.306177  | 1.683923  | 2.853540 |
| C | -4.367804  | 0.480604  | 1.957992 |
| C | -5.047209  | 1.699153  | 2.226033 |
| H | -6.821204  | 2.625793  | 3.040949 |
| C | -4.196166  | 2.761398  | 1.724653 |
| C | -8.287272  | 0.377512  | 3.867435 |
| C | -8.912479  | 1.766799  | 4.093070 |
| H | -9.056007  | 2.309402  | 3.146679 |
| H | -8.296250  | 2.389983  | 4.758344 |
| H | -9.899963  | 1.651130  | 4.564402 |
| C | -8.176023  | -0.328876 | 5.240202 |
| H | -7.513057  | 0.231809  | 5.916492 |
| H | -7.777927  | -1.348972 | 5.142571 |
| H | -9.168271  | -0.398273 | 5.712582 |
| C | -9.235442  | -0.435731 | 2.953851 |
| H | -10.234170 | -0.509090 | 3.411824 |
| H | -8.864609  | -1.457935 | 2.789835 |
| H | -9.343460  | 0.048561  | 1.971368 |

N -3.155904 0.752727 1.346777  
C -3.048731 2.130260 1.174282  
H -2.553578 0.053658 0.887193  
C -4.314708 4.163757 1.720291  
C -3.294373 4.935311 1.159802  
H -5.199646 4.628446 2.154006  
C -2.160750 4.286010 0.605421  
C -2.002314 2.891454 0.597809  
H -1.361928 4.874959 0.163936  
C -3.351791 6.475549 1.116509  
C -4.636414 7.029159 1.761089  
H -4.715886 6.747843 2.821918  
H -5.540309 6.675318 1.242534  
H -4.628672 8.127909 1.706331  
C -3.305745 6.955431 -0.353888  
H -4.163778 6.562850 -0.920666  
H -2.385911 6.628039 -0.859257  
H -3.341106 8.055489 -0.397286  
C -2.140200 7.062058 1.879827  
H -2.169841 8.162569 1.853219  
H -1.186702 6.739709 1.437636  
H -2.150645 6.744674 2.933631  
N -0.890103 2.206011 0.071089  
C 0.293415 2.758744 -0.396799  
H -0.994645 1.173883 -0.038252  
O 0.492372 3.978673 -0.522027  
H 2.239058 5.229151 -3.939767  
H 8.332831 -1.413516 -4.375799  
H 3.650176 3.783301 -5.530693  
H 7.757115 -3.098221 -4.373946  
C 8.511992 -2.414405 -3.957021

C 3.177393 5.614120 -3.513531  
H 3.461289 6.510392 -4.085434  
H 9.503993 -2.749695 -4.298120  
C 4.548323 4.238312 -5.086014  
H 5.384728 3.536658 -5.216005  
H 2.981609 5.928233 -2.477420  
C 4.312908 4.576940 -3.594330  
N -4.174767 -1.926672 2.073387  
N 4.120711 -3.041602 0.151473  
C 4.947361 -2.299113 -0.702730  
C 6.217893 -2.719873 -1.151845  
C 3.992393 3.282625 -2.817602  
C 4.535586 -1.004622 -1.084714  
C 2.776154 3.125809 -2.116009  
C 2.448947 1.964679 -1.390111  
C 3.398132 0.917126 -1.400523  
H 4.784604 5.153485 -5.651697  
N 3.363784 -0.332127 -0.782520  
C 4.924525 2.235984 -2.802346  
C 4.630361 1.058498 -2.100311  
C 5.360640 -0.180723 -1.899925  
C 7.059974 -1.921284 -1.954617  
N 1.232480 1.781957 -0.704772  
C 6.614408 -0.640983 -2.327113  
C 8.452870 -2.405303 -2.410651  
H 6.567475 -3.695566 -0.816072  
H 2.529593 -0.756817 -0.342670  
H 9.390885 -0.418579 -2.233367  
H 2.051208 3.932847 -2.105218  
H 5.875663 2.325712 -3.330274  
H 7.245042 0.006362 -2.939852

C 9.537831 -1.444909 -1.867338  
H 10.537044 -1.778143 -2.188961  
H 8.788913 -3.882145 -0.811493  
C 8.776656 -3.826083 -1.910605  
C 5.594720 5.220899 -3.013378  
H 5.842181 6.142826 -3.563201  
H 9.774266 -4.119812 -2.269012  
H 9.523156 -1.419268 -0.767145  
H 5.455901 5.481915 -1.953120  
H 6.457099 4.542849 -3.086732  
H 8.055764 -4.567671 -2.286924  
H 1.043126 0.828038 -0.329224  
C -4.295420 -2.961555 2.850826  
C 4.113881 -4.339927 0.086091  
C 3.376158 -5.147789 1.011140  
H 4.667272 -4.893588 -0.690961  
C -3.621210 -4.199857 2.597984  
H -4.911865 -2.942173 3.765344  
N 2.634669 -4.618258 2.053418  
C 3.251513 -6.544148 1.088546  
C 2.421487 -6.839070 2.195350  
C 2.052725 -5.623291 2.772031  
N -2.770951 -4.402018 1.523613  
C -2.281268 -5.677457 1.549786  
C -3.663321 -5.404202 3.318510  
C -2.824036 -6.330042 2.656064  
H -4.248288 -5.574187 4.218664  
H 3.719602 -7.252872 0.410260  
H 1.425847 -5.406203 3.630960  
H 2.116611 -7.822115 2.542514  
H -2.625915 -7.358270 2.944159

H -1.589207 -6.028678 0.791564  
H 2.546462 -3.621440 2.233336  
H -2.533690 -3.683784 0.840988  
C -1.284129 -4.546455 -2.099712  
C -2.295649 -5.034720 -2.854412  
C -2.335611 -6.397629 -3.462365  
C -1.285322 -3.216719 -1.531509  
C -0.285762 -2.693693 -0.778439  
C -0.288274 -1.293338 -0.272625  
O 0.806108 -0.851746 0.228464  
H -1.434698 -6.980483 -3.226873  
H -2.435934 -6.333476 -4.558831  
H -3.218464 -6.957058 -3.109864  
H -0.408810 -5.177405 -1.905794  
H -3.161357 -4.388614 -3.042430  
H -2.155111 -2.582715 -1.739445  
H 0.613873 -3.276622 -0.563042  
O -1.346436 -0.585193 -0.379302

### 3.3.19 CzU-DPM free receptor

125 0

C -4.505625 -0.781991 2.544536  
C -5.634422 -0.703992 3.380159  
C -6.461366 0.443373 3.465361  
H -5.895120 -1.588956 3.963762  
C -6.147042 1.561743 2.680981  
C -4.237298 0.352723 1.749894  
C -5.032862 1.525156 1.822692  
H -6.760467 2.461199 2.722865  
C -4.436410 2.482646 0.907234

C -7.680999 0.415178 4.408835  
C -8.467184 1.739410 4.386049  
H -8.867864 1.961131 3.385615  
H -7.846264 2.589828 4.705946  
H -9.319521 1.670085 5.078377  
C -7.206796 0.162270 5.860150  
H -6.527435 0.960676 6.195187  
H -6.677083 -0.796457 5.954777  
H -8.070879 0.138085 6.542428  
C -8.639735 -0.722459 3.982279  
H -9.513525 -0.752691 4.651598  
H -8.149390 -1.705545 4.024209  
H -9.001171 -0.565690 2.954530  
N -3.211337 0.550409 0.840597  
C -3.309030 1.835937 0.329359  
H -2.456641 -0.109538 0.681065  
C -4.735357 3.812783 0.564144  
C -3.929484 4.496091 -0.354782  
H -5.594336 4.301691 1.022370  
C -2.829057 3.816338 -0.934716  
C -2.499551 2.497088 -0.611816  
H -2.201537 4.328179 -1.662673  
C -4.204435 5.954163 -0.773187  
C -5.430807 6.544957 -0.052651  
H -5.297162 6.558077 1.039484  
H -6.349895 5.984921 -0.282049  
H -5.582858 7.583394 -0.382570  
C -4.465033 6.015246 -2.297613  
H -5.340835 5.406657 -2.569742  
H -3.603105 5.648033 -2.873303  
H -4.659497 7.053672 -2.608279



C -2.975399 6.830035 -0.432002  
H -3.157595 7.873618 -0.732434  
H -2.071434 6.482605 -0.952383  
H -2.771626 6.815265 0.649496  
N -1.420533 1.800604 -1.211288  
C -0.150900 2.317863 -1.420387  
H -1.597198 0.837654 -1.490869  
O 0.190526 3.453539 -1.072303  
H 2.293552 4.954071 -4.925443  
H 8.571104 -1.492538 -3.807704  
H 4.142881 3.605268 -6.094474  
H 8.060154 -3.197687 -3.834720  
C 8.690251 -2.464811 -3.308367  
C 3.066445 5.384859 -4.270866  
H 3.434401 6.303866 -4.750348  
H 9.741320 -2.774456 -3.419036  
C 4.870393 4.105121 -5.436949  
H 5.751246 3.453410 -5.346368  
H 2.593336 5.672845 -3.319883  
C 4.243569 4.415076 -4.056597  
N -3.669966 -1.898143 2.395683  
N 3.498546 -3.174388 -0.362027  
C 4.510738 -2.391654 -0.934183  
C 5.867284 -2.762291 -1.057331  
C 3.807347 3.098448 -3.381571  
C 4.148093 -1.150098 -1.491349  
C 2.464804 2.860322 -3.014388  
C 2.050375 1.675592 -2.389133  
C 3.023345 0.698671 -2.130666  
H 5.191223 5.037807 -5.926658  
N 2.901917 -0.544592 -1.526327

C 4.761841 2.098206 -3.131068  
C 4.380631 0.899038 -2.515563  
C 5.103935 -0.293643 -2.102211  
C 6.838566 -1.945473 -1.675307  
N 0.698083 1.419800 -2.048990  
C 6.442792 -0.698883 -2.193678  
C 8.310826 -2.387842 -1.809804  
H 6.156640 -3.743580 -0.682191  
H 2.075910 -0.916587 -1.068046  
H 9.119221 -0.352832 -1.548311  
H 1.704539 3.611804 -3.212997  
H 5.806373 2.249032 -3.410033  
H 7.171327 -0.045089 -2.676595  
C 9.224010 -1.354318 -1.107307  
H 10.279187 -1.654962 -1.201208  
H 8.348065 -3.773963 -0.100070  
C 8.573431 -3.766954 -1.177108  
C 5.295927 5.121574 -3.168190  
H 5.622118 6.062065 -3.639136  
H 9.635952 -4.025570 -1.296576  
H 8.982676 -1.282163 -0.035921  
H 4.876864 5.361685 -2.179142  
H 6.185333 4.493167 -3.017827  
H 7.982374 -4.560268 -1.659263  
H 0.340726 0.490000 -2.259440  
C -3.480141 -2.704301 3.400375  
C 3.785089 -4.017249 0.588617  
C 2.813656 -4.904812 1.147347  
H 4.793741 -4.088158 1.028624  
C -2.706272 -3.901086 3.289833  
H -3.893468 -2.502049 4.402485

N 1.496990 -4.963220 0.718548  
C 2.954352 -5.871150 2.155856  
C 1.705981 -6.507612 2.314831  
C 0.807633 -5.926911 1.406971  
N -2.111995 -4.318435 2.109201  
C -1.457887 -5.508124 2.292652  
C -2.405908 -4.871113 4.259246  
C -1.630823 -5.871066 3.636918  
H -2.729311 -4.842293 5.296694  
H 3.872617 -6.082713 2.697817  
H 1.471996 -7.303550 3.014755  
H -1.230334 -6.763533 4.107686  
H 1.131585 -4.378635 -0.028961  
H -2.192515 -3.803593 1.236027  
C -0.675035 -6.207046 1.186979  
C -0.921496 -7.731761 1.279593  
H -0.617098 -8.136868 2.252888  
H -0.350086 -8.250778 0.497454  
H -1.989980 -7.946134 1.137560  
C -1.129755 -5.722040 -0.206065  
H -0.989168 -4.640974 -0.358279  
H -2.195851 -5.943335 -0.351679  
H -0.563616 -6.245322 -0.988223

### 3.3.20 CzU-DPM acetate complex

132 -1

C -4.304823 -0.635082 2.585382  
C -5.492348 -0.649035 3.340838  
C -6.382658 0.450452 3.416015  
H -5.752110 -1.572716 3.861237

C -6.078361 1.615037 2.698170  
C -4.042411 0.548282 1.864122  
C -4.908477 1.670655 1.918570  
H -6.744164 2.477218 2.726542  
C -4.319017 2.687161 1.065180  
C -7.660287 0.317528 4.269554  
C -8.511083 1.601183 4.251403  
H -8.854970 1.850758 3.236454  
H -7.958057 2.464788 4.650469  
H -9.402761 1.457369 4.879645  
C -7.272605 0.018461 5.737715  
H -6.658522 0.831447 6.154182  
H -6.702284 -0.917234 5.826109  
H -8.177914 -0.078884 6.356851  
C -8.528049 -0.843358 3.727070  
H -9.440621 -0.950245 4.333959  
H -7.990769 -1.802203 3.756093  
H -8.829855 -0.653637 2.685722  
N -2.977213 0.830543 1.025794  
C -3.124835 2.126926 0.543442  
H -2.160611 0.230830 0.924195  
C -4.694154 3.999275 0.718851  
C -3.887582 4.740473 -0.150214  
H -5.608526 4.421867 1.133157  
C -2.710158 4.149198 -0.677954  
C -2.308781 2.846193 -0.354771  
H -2.076678 4.713480 -1.357560  
C -4.231107 6.185998 -0.563842  
C -5.533475 6.685418 0.089757  
H -5.464949 6.688426 1.187989  
H -6.399164 6.071484 -0.201109

H -5.732837 7.717513 -0.234741  
C -4.404118 6.260405 -2.099965  
H -5.221681 5.603633 -2.434304  
H -3.487880 5.958650 -2.627619  
H -4.645422 7.290413 -2.405926  
C -3.083937 7.132347 -0.135829  
H -3.315591 8.168161 -0.429714  
H -2.130415 6.853814 -0.606948  
H -2.943421 7.108979 0.955537  
N -1.173838 2.197528 -0.866214  
C -0.075223 2.765942 -1.494379  
H -1.068607 1.193409 -0.653774  
O 0.051770 3.972751 -1.740679  
H 2.452834 5.064482 -5.022025  
H 8.491375 -1.512333 -3.747268  
H 4.182252 3.547600 -6.169263  
H 7.889916 -3.187445 -3.708085  
C 8.577979 -2.476306 -3.225987  
C 3.274550 5.503913 -4.436772  
H 3.660364 6.367253 -4.999056  
H 9.605974 -2.845293 -3.367181  
C 4.961664 4.059718 -5.584608  
H 5.816927 3.376056 -5.484791  
H 2.860596 5.881058 -3.489691  
C 4.416430 4.496448 -4.203835  
N -3.420171 -1.712512 2.427468  
N 3.471875 -2.867010 -0.102128  
C 4.501358 -2.125346 -0.697282  
C 5.833358 -2.565876 -0.861253  
C 3.956398 3.251628 -3.415446  
C 4.179636 -0.879225 -1.270011

C 2.619166 3.108016 -2.978999  
C 2.178248 1.988379 -2.253790  
C 3.123358 0.985708 -1.969496  
H 5.297758 4.938396 -6.157302  
N 2.963034 -0.215971 -1.285638  
C 4.879967 2.234969 -3.127973  
C 4.468928 1.100447 -2.412042  
C 5.151084 -0.099573 -1.956696  
C 6.819869 -1.818691 -1.539303  
N 0.858284 1.790152 -1.813198  
C 6.464266 -0.572937 -2.085971  
C 8.261024 -2.340661 -1.717089  
H 6.086430 -3.554153 -0.478562  
H 2.123703 -0.528972 -0.793000  
H 9.177926 -0.343716 -1.540877  
H 1.887421 3.880854 -3.192523  
H 5.917536 2.317513 -3.455979  
H 7.200597 0.024498 -2.626912  
C 9.252275 -1.338248 -1.078575  
H 10.286800 -1.693478 -1.206321  
H 8.294016 -3.682768 0.027324  
C 8.477695 -3.714875 -1.057123  
C 5.539739 5.216024 -3.419146  
H 5.882765 6.104367 -3.972677  
H 9.520255 -4.031714 -1.209025  
H 9.059070 -1.228531 -0.000542  
H 5.179149 5.545683 -2.433012  
H 6.407651 4.559931 -3.262379  
H 7.828962 -4.488614 -1.495185  
H 0.622318 0.846501 -1.467281  
C -3.315955 -2.591092 3.382200

C 3.760999 -3.744385 0.814943  
C 2.822725 -4.682401 1.346566  
H 4.780612 -3.842577 1.225871  
C -2.580173 -3.811913 3.282040  
H -3.823698 -2.454361 4.352783  
N 1.483952 -4.766268 0.987700  
C 3.099991 -5.781584 2.175396  
C 1.913792 -6.530505 2.300115  
C 0.917064 -5.879852 1.557947  
N -1.850426 -4.232560 2.177093  
C -1.393162 -5.511386 2.380736  
C -2.575351 -4.868146 4.208157  
C -1.841507 -5.928089 3.642901  
H -3.089176 -4.860789 5.166348  
H 4.074552 -6.017959 2.595533  
H 1.788841 -7.454720 2.855194  
H -1.661823 -6.900530 4.090352  
H 0.970516 -4.019046 0.496329  
H -1.577985 -3.624860 1.388370  
C -0.544225 -6.267150 1.366834  
C -0.698203 -7.784162 1.613083  
H -0.383111 -8.079617 2.621866  
H -0.089698 -8.341576 0.887720  
H -1.749501 -8.075460 1.483549  
C -1.011396 -5.969285 -0.078566  
H -0.935570 -4.903862 -0.333960  
H -2.059405 -6.279028 -0.199296  
H -0.397873 -6.540818 -0.789351  
O -0.383834 -2.659034 0.187870  
O -0.131963 -0.492732 -0.364781  
C -0.619113 -1.666635 -0.563638

H -1.428652 -2.854129 -2.192129  
C -1.564350 -1.860623 -1.745673  
H -1.427464 -1.084911 -2.509030  
H -2.601459 -1.804893 -1.379036

### 3.3.21 CzU-DPM benzoate complex

139 -1

C -4.406936 -0.709982 2.366796  
C -5.611409 -0.737557 3.093870  
C -6.528073 0.342860 3.124866  
H -5.860074 -1.656703 3.627693  
C -6.230621 1.501469 2.394578  
C -4.154151 0.464281 1.628379  
C -5.042726 1.569563 1.642831  
H -6.914860 2.349580 2.392028  
C -4.447776 2.585776 0.792806  
C -7.821796 0.198681 3.951938  
C -8.716178 1.449278 3.860379  
H -9.035298 1.649235 2.826434  
H -8.207510 2.346375 4.244067  
H -9.621852 1.295761 4.465837  
C -7.458998 -0.026562 5.439720  
H -6.880830 0.822565 5.834718  
H -6.860945 -0.938716 5.578312  
H -8.374560 -0.128160 6.042933  
C -8.636245 -1.013115 3.438993  
H -9.562490 -1.121645 4.024481  
H -8.071388 -1.952189 3.527334  
H -8.913316 -0.880560 2.382041  
N -3.068817 0.757557 0.821365



C -3.226931 2.042394 0.314597  
H -2.256228 0.153058 0.726061  
C -4.835895 3.886479 0.419155  
C -4.016094 4.634157 -0.431883  
H -5.770634 4.296047 0.799684  
C -2.809990 4.060941 -0.912058  
C -2.393082 2.771157 -0.558452  
H -2.164893 4.631317 -1.575592  
C -4.375230 6.066767 -0.876045  
C -5.711190 6.545197 -0.276838  
H -5.683414 6.562012 0.823061  
H -6.552291 5.909327 -0.591938  
H -5.920274 7.569015 -0.620763  
C -4.493547 6.118610 -2.418272  
H -5.283419 5.439353 -2.773403  
H -3.552122 5.831677 -2.908514  
H -4.746566 7.139102 -2.745919  
C -3.265107 7.043183 -0.418799  
H -3.506455 8.069499 -0.737205  
H -2.288486 6.777983 -0.848560  
H -3.166593 7.038604 0.677372  
N -1.223426 2.146090 -1.021974  
C -0.091860 2.746859 -1.556908  
H -1.134863 1.133345 -0.858573  
O 0.029866 3.961728 -1.762783  
H 2.496293 5.245107 -4.854544  
H 8.376476 -1.566150 -4.117201  
H 4.186930 3.778638 -6.124892  
H 7.727241 -3.223264 -4.152081  
C 8.447389 -2.559067 -3.650353  
C 3.334225 5.628489 -4.252931

H 3.731656 6.518481 -4.762983  
H 9.460438 -2.948254 -3.837697  
C 4.981400 4.233075 -5.513341  
H 5.823066 3.527022 -5.469498  
H 2.939998 5.952228 -3.277980  
C 4.456600 4.584528 -4.100766  
N -3.492886 -1.766963 2.255632  
N 3.424198 -2.961665 -0.373082  
C 4.448383 -2.232423 -0.993991  
C 5.762675 -2.699210 -1.213904  
C 3.978177 3.298507 -3.393741  
C 4.140403 -0.960651 -1.513193  
C 2.646087 3.159860 -2.939322  
C 2.190706 2.003726 -2.283582  
C 3.117253 0.964174 -2.083069  
H 5.331378 5.142392 -6.026651  
N 2.940994 -0.269881 -1.465114  
C 4.881034 2.242626 -3.195677  
C 4.455867 1.073534 -2.546424  
C 5.116397 -0.168118 -2.178323  
C 6.749502 -1.946888 -1.886753  
N 0.877992 1.796038 -1.830145  
C 6.413779 -0.666852 -2.362042  
C 8.171109 -2.496044 -2.128756  
H 6.000741 -3.707218 -0.875467  
H 2.093870 -0.607622 -1.002596  
H 9.146645 -0.536076 -1.871896  
H 1.930745 3.963148 -3.084883  
H 5.913763 2.322276 -3.539245  
H 7.153893 -0.060300 -2.887487  
C 9.204653 -1.555243 -1.464197

H 10.225628 -1.930171 -1.636641  
H 8.212853 -3.929440 -0.458248  
C 8.365808 -3.908682 -1.547906  
C 5.601591 5.225600 -3.279452  
H 5.957748 6.143324 -3.773383  
H 9.394297 -4.245351 -1.745879  
H 9.040417 -1.497546 -0.377460  
H 5.256503 5.492706 -2.269088  
H 6.457171 4.542839 -3.177456  
H 7.683119 -4.639899 -2.006970  
H 0.635830 0.836434 -1.537516  
C -3.358401 -2.594604 3.250249  
C 3.734834 -3.825571 0.549330  
C 2.809843 -4.739582 1.141340  
H 4.767115 -3.923008 0.927484  
C -2.586500 -3.796378 3.199745  
H -3.863084 -2.424964 4.217464  
N 1.457756 -4.832367 0.836960  
C 3.112806 -5.800921 2.008689  
C 1.929874 -6.537283 2.211608  
C 0.909073 -5.918250 1.476642  
N -1.878357 -4.257760 2.096469  
C -1.376330 -5.510227 2.355925  
C -2.517325 -4.795662 4.183633  
C -1.767553 -5.863686 3.655455  
H -2.999007 -4.747766 5.157208  
H 4.100880 -6.020418 2.405686  
H 1.821880 -7.433581 2.813826  
H -1.543105 -6.802640 4.151374  
H 0.933200 -4.121881 0.309613  
H -1.663357 -3.688635 1.264797

C -0.556179 -6.312292 1.352942  
C -0.702762 -7.815862 1.675966  
H -0.361203 -8.063706 2.688915  
H -0.113604 -8.407597 0.961966  
H -1.757182 -8.111505 1.588760  
C -1.067415 -6.082448 -0.088261  
H -0.948325 -5.039990 -0.412340  
H -2.132094 -6.348760 -0.152449  
H -0.509232 -6.723186 -0.785577  
C -2.284992 -1.181707 -4.319334  
C -3.188333 -2.248372 -4.396650  
C -1.489366 -1.018678 -3.181607  
C -1.568533 -1.928394 -2.113655  
C -2.474373 -2.998765 -2.205621  
C -3.284085 -3.154992 -3.333585  
H -2.202560 -0.473303 -5.145916  
H -0.789220 -0.184354 -3.126445  
H -2.542598 -3.704226 -1.377658  
H -3.990588 -3.985756 -3.385585  
H -3.815711 -2.372388 -5.281422  
C -0.699593 -1.766521 -0.879106  
O -0.561447 -2.761612 -0.108056  
O -0.157886 -0.617606 -0.677264

### 3.3.22 CzU-DPM lactate complex

136 -1

C -4.367708 -0.631755 2.588736  
C -5.510029 -0.588929 3.409986  
C -6.368994 0.534245 3.497282  
H -5.759951 -1.487978 3.976565

C -6.077629 1.664265 2.721938  
C -4.114190 0.517968 1.807761  
C -4.954485 1.661710 1.874642  
H -6.719797 2.544096 2.755889  
C -4.398424 2.632262 0.951228  
C -7.598580 0.463586 4.425403  
C -8.418316 1.767327 4.408465  
H -8.814467 1.989411 3.406266  
H -7.822216 2.629869 4.742907  
H -9.275504 1.669428 5.091349  
C -7.136093 0.205575 5.879591  
H -6.481508 1.017116 6.232256  
H -6.582680 -0.740112 5.969269  
H -8.007180 0.150997 6.551221  
C -8.523194 -0.692868 3.974772  
H -9.403195 -0.754307 4.633809  
H -8.007864 -1.663399 4.009818  
H -8.877422 -0.532629 2.944967  
N -3.084774 0.751343 0.913978  
C -3.246641 2.024505 0.380158  
H -2.347661 0.074837 0.658724  
C -4.769516 3.940119 0.587797  
C -4.005898 4.638082 -0.353241  
H -5.648458 4.393878 1.044350  
C -2.871769 4.004927 -0.922475  
C -2.464269 2.710572 -0.574604  
H -2.271057 4.539754 -1.654618  
C -4.354023 6.071603 -0.802655  
C -5.606607 6.617112 -0.091124  
H -5.470914 6.661393 0.999975  
H -6.496774 6.006119 -0.303863

H -5.811703 7.638993 -0.443586  
C -4.621316 6.087756 -2.327029  
H -5.467574 5.432040 -2.582756  
H -3.744138 5.749033 -2.897189  
H -4.866168 7.108631 -2.660015  
C -3.170079 7.016043 -0.485236  
H -3.404409 8.042582 -0.808346  
H -2.250804 6.701914 -0.999923  
H -2.964062 7.035702 0.595817  
N -1.351491 2.062952 -1.145588  
C -0.183123 2.686755 -1.567644  
H -1.289271 1.035874 -1.023927  
O 0.046900 3.899708 -1.458827  
H 2.528890 5.349563 -4.860500  
H 8.424675 -1.430694 -3.821840  
H 4.352861 3.954398 -6.016915  
H 7.804647 -3.094572 -3.947324  
C 8.471079 -2.433385 -3.372818  
C 3.299734 5.723661 -4.169891  
H 3.724711 6.638417 -4.608634  
H 9.501735 -2.805376 -3.483828  
C 5.080341 4.399203 -5.320914  
H 5.927472 3.704917 -5.224592  
H 2.810742 6.004381 -3.224720  
C 4.423665 4.693147 -3.951035  
N -3.525129 -1.741481 2.428484  
N 3.201015 -2.954512 -0.495564  
C 4.263546 -2.212924 -1.041401  
C 5.595924 -2.662346 -1.173547  
C 3.906995 3.376842 -3.332725  
C 3.987077 -0.932477 -1.557367

C 2.541546 3.194587 -3.012641  
C 2.053603 2.011440 -2.436819  
C 2.980003 0.986988 -2.180911  
H 5.458518 5.331101 -5.769590  
N 2.784402 -0.248347 -1.578628  
C 4.809133 2.328766 -3.086756  
C 4.353785 1.129239 -2.520152  
C 5.002205 -0.111858 -2.123839  
C 6.625500 -1.881651 -1.742301  
N 0.697923 1.776482 -2.124184  
C 6.316588 -0.591382 -2.208855  
C 8.069165 -2.409538 -1.878357  
H 5.821526 -3.675792 -0.843020  
H 1.889080 -0.658089 -1.329626  
H 8.996101 -0.445764 -1.497914  
H 1.824111 3.987480 -3.204801  
H 5.867069 2.440522 -3.331109  
H 7.091052 0.035895 -2.654086  
C 9.031965 -1.473286 -1.109087  
H 10.068180 -1.833768 -1.203265  
H 7.991810 -3.880989 -0.242811  
C 8.234053 -3.833063 -1.315202  
C 5.477400 5.323119 -3.008336  
H 5.858760 6.263002 -3.437274  
H 9.279906 -4.153120 -1.434525  
H 8.776472 -1.442019 -0.039061  
H 5.038132 5.549566 -2.024762  
H 6.333321 4.651133 -2.852064  
H 7.601562 -4.561162 -1.845339  
H 0.359521 0.807882 -2.237499  
C -3.376377 -2.577296 3.414003

C 3.472182 -3.850087 0.410594  
C 2.546542 -4.776363 0.984587  
H 4.495319 -3.966636 0.808213  
C -2.670648 -3.817255 3.314331  
H -3.814058 -2.386257 4.409488  
N 1.185623 -4.886541 0.720319  
C 2.884269 -5.829536 1.851444  
C 1.716756 -6.573742 2.098720  
C 0.667102 -5.968297 1.392893  
N -2.017047 -4.280228 2.179653  
C -1.568623 -5.561590 2.392313  
C -2.626089 -4.845210 4.269920  
C -1.945590 -5.934053 3.691241  
H -3.079571 -4.802071 5.257207  
H 3.885855 -6.033814 2.222135  
H 1.635785 -7.463533 2.714588  
H -1.755800 -6.896758 4.155094  
H 0.621576 -4.187661 0.211230  
H -1.780027 -3.686801 1.364891  
C -0.802816 -6.368560 1.349851  
C -0.921203 -7.870352 1.692181  
H -0.521430 -8.108789 2.685938  
H -0.370035 -8.464202 0.950260  
H -1.976835 -8.173344 1.666717  
C -1.401017 -6.159376 -0.061866  
H -1.360205 -5.111327 -0.384987  
H -2.451977 -6.481657 -0.066905  
H -0.849122 -6.770205 -0.790638  
O -0.960638 -0.678527 -0.347516  
H -1.752267 -2.222251 -2.668905  
H -0.159654 -0.955527 -3.856038



C -0.830891 -1.863939 -0.784403  
H 0.214160 -3.305928 -3.825377  
C -0.715208 -2.062744 -2.315420  
O -0.216960 -0.830379 -2.891036  
C 0.147368 -3.251501 -2.728249  
O -0.826344 -2.914804 -0.073246  
H -0.299090 -4.188867 -2.373346  
H 1.160238 -3.165910 -2.308510

### 3.3.23 CzU-DPM formate complex

129 -1

C -4.369157 -0.693113 2.514893  
C -5.566061 -0.712821 3.254759  
C -6.454302 0.388705 3.330157  
H -5.834716 -1.641482 3.761598  
C -6.137644 1.561330 2.630611  
C -4.095909 0.498084 1.811503  
C -4.956756 1.623553 1.867991  
H -6.801568 2.424864 2.661263  
C -4.349768 2.647884 1.035261  
C -7.744280 0.248844 4.163885  
C -8.591319 1.535045 4.149903  
H -8.919977 1.798466 3.133427  
H -8.041849 2.391929 4.567849  
H -9.492268 1.385697 4.763464  
C -7.378374 -0.069835 5.633496  
H -6.768317 0.736150 6.069017  
H -6.811802 -1.008137 5.718235  
H -8.292746 -0.172417 6.238244  
C -8.607268 -0.902558 3.594252

H -9.528605 -1.014726 4.186828  
H -8.072995 -1.863237 3.618483  
H -8.893842 -0.698562 2.551329  
N -3.019643 0.784634 0.989050  
C -3.150523 2.088611 0.523482  
H -2.197762 0.191522 0.917051  
C -4.713968 3.965195 0.698011  
C -3.892009 4.711413 -0.152321  
H -5.632079 4.387777 1.103904  
C -2.711087 4.119986 -0.671628  
C -2.320677 2.810989 -0.359099  
H -2.067307 4.688583 -1.337790  
C -4.222711 6.163109 -0.554732  
C -5.532280 6.661403 0.085141  
H -5.479888 6.652164 1.184233  
H -6.396385 6.054759 -0.225122  
H -5.722189 7.697891 -0.230892  
C -4.372638 6.255609 -2.092307  
H -5.187660 5.605997 -2.446267  
H -3.449855 5.956439 -2.609868  
H -4.605525 7.290003 -2.389794  
C -3.077517 7.098938 -0.099227  
H -3.299771 8.139041 -0.385073  
H -2.118427 6.820824 -0.559208  
H -2.953391 7.062910 0.993781  
N -1.185169 2.161672 -0.870720  
C -0.097107 2.725929 -1.521998  
H -1.095177 1.152477 -0.688663  
O 0.051644 3.938038 -1.724782  
H 2.405097 5.002367 -5.131438  
H 8.450976 -1.555280 -3.799855

H 4.141028 3.483654 -6.265296  
H 7.858433 -3.233318 -3.751201  
C 8.540422 -2.514947 -3.271188  
C 3.223465 5.444617 -4.543602  
H 3.610924 6.306668 -5.106728  
H 9.571034 -2.879404 -3.404987  
C 4.917361 3.998288 -5.678763  
H 5.772590 3.315523 -5.572616  
H 2.804475 5.824172 -3.599707  
C 4.365386 4.439219 -4.301992  
N -3.482240 -1.769563 2.356086  
N 3.425991 -2.910283 -0.162690  
C 4.449919 -2.165717 -0.763645  
C 5.784804 -2.600648 -0.919045  
C 3.902728 3.196744 -3.511600  
C 4.122061 -0.925648 -1.347593  
C 2.563642 3.051439 -3.081516  
C 2.121803 1.934041 -2.354737  
C 3.063784 0.930020 -2.064377  
H 5.255530 4.875247 -6.252876  
N 2.904356 -0.264315 -1.367903  
C 4.825251 2.181604 -3.215536  
C 4.411970 1.047633 -2.500113  
C 5.095309 -0.146733 -2.033917  
C 6.771277 -1.853830 -1.597400  
N 0.797500 1.743038 -1.919041  
C 6.411725 -0.613604 -2.153271  
C 8.215738 -2.369950 -1.764792  
H 6.040432 -3.584759 -0.527354  
H 2.044481 -0.598040 -0.917880  
H 9.122270 -0.367378 -1.598974

H 1.831422 3.822472 -3.300967  
H 5.865000 2.265313 -3.536493  
H 7.147399 -0.015224 -2.694128  
C 9.199248 -1.358151 -1.129067  
H 10.236078 -1.709255 -1.249419  
H 8.247087 -3.699089 -0.010523  
C 8.436022 -3.738268 -1.093812  
C 5.484376 5.162625 -3.514709  
H 5.829163 6.049300 -4.069825  
H 9.480800 -4.051156 -1.238538  
H 9.000484 -1.241491 -0.052762  
H 5.118970 5.495465 -2.531420  
H 6.352168 4.507911 -3.351631  
H 7.793044 -4.518286 -1.529173  
H 0.552633 0.790651 -1.615268  
C -3.383233 -2.652374 3.307863  
C 3.720613 -3.768745 0.770172  
C 2.789217 -4.707915 1.312586  
H 4.739258 -3.848439 1.187624  
C -2.640944 -3.869831 3.215624  
H -3.898806 -2.518664 4.274683  
N 1.452563 -4.806547 0.949877  
C 3.072278 -5.792758 2.157756  
C 1.891403 -6.549269 2.287999  
C 0.891987 -5.917102 1.533385  
N -1.902858 -4.297243 2.118371  
C -1.427975 -5.566050 2.342002  
C -2.623726 -4.912911 4.156747  
C -1.873279 -5.970269 3.609486  
H -3.137713 -4.897527 5.114760  
H 4.046889 -6.015749 2.585037

|   |           |           |           |
|---|-----------|-----------|-----------|
| H | 1.772150  | -7.467015 | 2.854903  |
| H | -1.679809 | -6.932702 | 4.072491  |
| H | 0.939395  | -4.064275 | 0.449083  |
| H | -1.643429 | -3.704715 | 1.313657  |
| C | -0.564416 | -6.324612 | 1.342122  |
| C | -0.700100 | -7.839794 | 1.611146  |
| H | -0.386084 | -8.116210 | 2.625598  |
| H | -0.081382 | -8.400375 | 0.896944  |
| H | -1.747071 | -8.146266 | 1.481438  |
| C | -1.030388 | -6.058302 | -0.109913 |
| H | -0.972186 | -4.997675 | -0.386390 |
| H | -2.072694 | -6.387687 | -0.228774 |
| H | -0.405297 | -6.632917 | -0.808064 |
| O | -0.450201 | -2.772814 | 0.065771  |
| O | -0.067979 | -0.607987 | -0.495709 |
| C | -0.770184 | -1.672922 | -0.461053 |
| H | -1.780759 | -1.615655 | -0.935540 |

### 3.3.24 CzU-DPM sorbate complex

140 -1

|   |           |           |          |
|---|-----------|-----------|----------|
| C | -4.454806 | -0.718885 | 2.353390 |
| C | -5.644798 | -0.730089 | 3.104925 |
| C | -6.534994 | 0.369891  | 3.174029 |
| H | -5.905366 | -1.651652 | 3.628680 |
| C | -6.226532 | 1.532878  | 2.455540 |
| C | -4.191292 | 0.460464  | 1.625690 |
| C | -5.054729 | 1.585079  | 1.678455 |
| H | -6.890360 | 2.396673  | 2.481418 |
| C | -4.460894 | 2.600061  | 0.826843 |
| C | -7.816594 | 0.239229  | 4.021902 |

C -8.665226 1.524270 3.999617  
H -9.003811 1.774327 2.983008  
H -8.112666 2.386991 4.401245  
H -9.560158 1.381982 4.623570  
C -7.436761 -0.060588 5.491925  
H -6.823369 0.751301 5.911527  
H -6.868585 -0.997306 5.583250  
H -8.345356 -0.156338 6.106451  
C -8.683459 -0.920268 3.474953  
H -9.599063 -1.026180 4.077458  
H -8.147446 -1.879771 3.506124  
H -8.980047 -0.729762 2.432250  
N -3.123151 0.740945 0.790863  
C -3.267425 2.036537 0.306079  
H -2.322422 0.124702 0.664907  
C -4.830473 3.914688 0.484385  
C -4.019428 4.656215 -0.380074  
H -5.743837 4.339229 0.898973  
C -2.842776 4.062439 -0.906417  
C -2.446176 2.757243 -0.586430  
H -2.204865 4.627381 -1.581303  
C -4.356504 6.104478 -0.789222  
C -5.659117 6.605952 -0.137734  
H -5.593902 6.604714 0.960708  
H -6.525979 5.995999 -0.433461  
H -5.854030 7.639906 -0.459021  
C -4.524473 6.185462 -2.325568  
H -5.343356 5.532971 -2.665037  
H -3.607696 5.882468 -2.851576  
H -4.761111 7.217524 -2.628234  
C -3.207284 7.045042 -0.354043

H -3.434276 8.082827 -0.644601  
H -2.253335 6.764866 -0.823328  
H -3.070196 7.016931 0.737654  
N -1.309599 2.109476 -1.096201  
C -0.206228 2.681271 -1.713247  
H -1.217729 1.099388 -0.907041  
O -0.069777 3.891749 -1.935324  
H 2.317429 4.992798 -5.250738  
H 8.349144 -1.604595 -3.995356  
H 4.047485 3.480799 -6.404442  
H 7.747514 -3.279566 -3.953249  
C 8.435730 -2.567688 -3.472455  
C 3.139163 5.428988 -4.663065  
H 3.525996 6.294513 -5.221258  
H 9.463656 -2.937050 -3.613175  
C 4.826536 3.989504 -5.816338  
H 5.681356 3.304907 -5.719182  
H 2.724986 5.802338 -3.714572  
C 4.280090 4.419574 -4.433974  
N -3.566416 -1.794654 2.208768  
N 3.332346 -2.947616 -0.338244  
C 4.360024 -2.210479 -0.942685  
C 5.691597 -2.652036 -1.106400  
C 3.818315 3.171224 -3.652201  
C 4.037836 -0.966873 -1.520263  
C 2.481120 3.027551 -3.215393  
C 2.039820 1.905272 -2.494915  
C 2.983249 0.899522 -2.217395  
H 5.163767 4.870895 -6.384156  
N 2.822323 -0.302002 -1.534183  
C 4.740646 2.151691 -3.370368

C 4.328907 1.014176 -2.659555  
C 5.009909 -0.187476 -2.206559  
C 6.678073 -1.906645 -1.786668  
N 0.720298 1.705937 -2.052704  
C 6.323030 -0.661391 -2.334742  
C 8.119041 -2.429404 -1.963747  
H 5.944628 -3.638903 -0.720023  
H 1.977147 -0.623011 -1.057223  
H 9.036945 -0.432583 -1.791198  
H 1.750541 3.802864 -3.424113  
H 5.778354 2.235111 -3.697730  
H 7.059935 -0.064379 -2.875362  
C 9.110800 -1.426302 -1.327083  
H 10.145149 -1.782266 -1.454207  
H 8.152304 -3.768459 -0.216994  
C 8.335335 -3.802577 -1.301481  
C 5.403070 5.134373 -3.644378  
H 5.747380 6.025238 -4.193026  
H 9.377641 -4.120248 -1.453399  
H 8.917680 -1.314523 -0.249245  
H 5.041602 5.459331 -2.657002  
H 6.270305 4.476821 -3.489925  
H 7.685920 -4.576729 -1.737790  
H 0.480177 0.755623 -1.727742  
C -3.460168 -2.661624 3.173608  
C 3.626172 -3.809374 0.592060  
C 2.693427 -4.741825 1.142708  
H 4.647271 -3.897026 1.001658  
C -2.716992 -3.879270 3.088632  
H -3.971307 -2.516777 4.141310  
N 1.353239 -4.837597 0.792016



C 2.979579 -5.825963 1.988161  
C 1.797509 -6.578153 2.131095  
C 0.794362 -5.944286 1.383324  
N -1.980070 -4.305323 1.990573  
C -1.518132 -5.580412 2.207336  
C -2.711957 -4.927477 4.023729  
C -1.970679 -5.988843 3.470672  
H -3.231014 -4.914834 4.979049  
H 3.957321 -6.051205 2.407032  
H 1.679610 -7.493939 2.701459  
H -1.789588 -6.957081 3.926603  
H 0.832160 -4.100351 0.293407  
H -1.702442 -3.699666 1.200849  
C -0.664862 -6.342785 1.201974  
C -0.808512 -7.857719 1.466280  
H -0.489822 -8.139198 2.477946  
H -0.197461 -8.419560 0.746497  
H -1.858056 -8.157555 1.342017  
C -1.136230 -6.064858 -0.245763  
H -1.061499 -5.002425 -0.513121  
H -2.184202 -6.376612 -0.360452  
H -0.523373 -6.643351 -0.951409  
C -2.669596 -1.690078 -4.194129  
C -2.909445 -0.851139 -5.228603  
C -3.731510 -1.180641 -6.430781  
C -1.866935 -1.333364 -3.045806  
C -1.606214 -2.157674 -2.002245  
C -0.760792 -1.800380 -0.828884  
O -0.523765 -2.723203 0.016863  
H -4.134161 -2.201824 -6.386195  
H -3.134388 -1.078302 -7.352452

H -4.572970 -0.475323 -6.534890  
H -3.099523 -2.698463 -4.211091  
H -2.471159 0.153642 -5.196588  
H -1.440942 -0.323885 -3.033658  
H -2.012553 -3.172820 -1.998660  
O -0.311082 -0.598040 -0.706912

### 3.3.25 CzU-BA free receptor

146 0

C 5.621694 4.538870 -0.319095  
C 4.480031 3.849795 -0.732159  
C 3.653366 4.297523 -1.792255  
H 4.227120 2.932016 -0.199250  
C 3.988284 5.492806 -2.440935  
C 5.951466 5.723459 -0.996950  
C 5.133796 6.207297 -2.053864  
H 3.373431 5.871498 -3.257210  
C 5.776009 7.411891 -2.548452  
C 2.415850 3.464590 -2.176255  
C 1.622886 4.100397 -3.332588  
H 2.229381 4.187311 -4.246444  
H 1.247892 5.100932 -3.070119  
H 0.753033 3.469632 -3.568845  
C 1.473835 3.342981 -0.954383  
H 1.134123 4.335254 -0.620566  
H 1.967982 2.849151 -0.105407  
H 0.585913 2.747760 -1.218672  
C 2.863452 2.049712 -2.615403  
H 1.986341 1.440089 -2.882918  
H 3.404174 1.527160 -1.813341

H 3.524265 2.102468 -3.493837  
N 7.017178 6.586445 -0.803499  
C 6.959769 7.580043 -1.771977  
H 7.924166 6.364411 -0.370654  
C 5.432747 8.331274 -3.552628  
C 6.273935 9.418237 -3.817025  
H 4.512103 8.187605 -4.117235  
C 7.460508 9.544863 -3.059572  
C 7.834271 8.651206 -2.045170  
H 8.137742 10.376840 -3.263960  
C 5.961543 10.469722 -4.899414  
C 4.636792 10.174992 -5.627706  
H 3.779696 10.180053 -4.937579  
H 4.659879 9.202964 -6.142813  
H 4.458210 10.951059 -6.386338  
C 7.097703 10.485806 -5.949891  
H 7.194352 9.504246 -6.438188  
H 8.067994 10.738273 -5.498452  
H 6.883152 11.235586 -6.726815  
C 5.853220 11.867971 -4.244481  
H 5.633878 12.628452 -5.009602  
H 6.787739 12.156348 -3.741832  
H 5.044481 11.890065 -3.497989  
N 9.049338 8.927137 -1.363378  
C 9.879448 8.106742 -0.646634  
H 9.428164 9.853962 -1.556763  
O 9.659959 6.903639 -0.417157  
N 6.415076 4.102665 0.780448  
C 6.961359 2.841192 0.887205  
H 6.514831 4.744359 1.565180  
O 7.011355 2.040832 -0.063973

C 8.033136 1.332548 2.567405  
C 7.769469 0.880134 3.867267  
C 8.336939 -0.296424 4.411097  
H 7.093939 1.481895 4.478697  
C 9.186110 -1.063318 3.603859  
C 8.911603 0.562641 1.784745  
C 9.464717 -0.644257 2.292495  
H 9.639923 -1.978310 3.982436  
C 10.305244 -1.183634 1.234244  
C 7.995750 -0.686651 5.862609  
C 8.692639 -1.991401 6.291649  
H 9.788613 -1.903684 6.248077  
H 8.388207 -2.843526 5.665492  
H 8.418041 -2.226367 7.330451  
C 6.467302 -0.886781 6.000613  
H 6.114891 -1.688940 5.334467  
H 5.912078 0.029649 5.753739  
H 6.213815 -1.164509 7.035401  
C 8.449593 0.441800 6.819639  
H 8.209234 0.175025 7.860597  
H 7.948776 1.394173 6.593148  
H 9.535929 0.602880 6.748888  
N 9.423518 0.817430 0.511643  
C 10.231322 -0.263477 0.160186  
H 8.817967 1.314193 -0.152368  
C 11.074504 -2.352573 1.102190  
C 11.762841 -2.605782 -0.091953  
H 11.122206 -3.058667 1.930882  
C 11.697357 -1.650944 -1.137416  
C 10.958867 -0.469015 -1.024337  
H 12.250365 -1.817049 -2.060098

C 12.607604 -3.877063 -0.305493  
C 12.585453 -4.805346 0.922772  
H 11.566989 -5.148699 1.158574  
H 12.999738 -4.314230 1.815938  
H 13.198671 -5.695411 0.717841  
C 14.078050 -3.482874 -0.585142  
H 14.501825 -2.923392 0.262606  
H 14.169903 -2.858329 -1.485194  
H 14.688651 -4.386068 -0.739031  
C 12.052600 -4.663919 -1.516858  
H 12.653518 -5.570718 -1.687538  
H 12.079117 -4.064391 -2.438135  
H 11.010629 -4.971595 -1.340773  
N 10.956517 0.571146 -1.984592  
C 11.028556 0.464099 -3.347459  
H 11.009892 1.527274 -1.619811  
O 11.047504 -0.627901 -3.938118  
N 7.471392 2.563144 2.144774  
H 7.182531 3.180925 2.901735  
C 11.006920 1.768610 -4.112622  
C 10.636385 1.677943 -5.446743  
C 11.311366 3.073708 -3.581910  
C 11.214422 4.199082 -4.379554  
C 10.522404 2.809336 -6.289624  
C 10.812205 4.104328 -5.738232  
H 10.415412 0.686944 -5.847317  
H 11.474851 5.179802 -3.983203  
C 10.128388 2.704463 -7.653441  
C 10.703217 5.246728 -6.579262  
C 10.029023 3.833179 -8.444449  
H 9.908324 1.716530 -8.064117

C 10.318980 5.111643 -7.900896  
H 10.926334 6.232921 -6.166576  
H 9.726957 3.746405 -9.489394  
H 10.237706 5.996173 -8.535295  
O 11.717453 3.115440 -2.264162  
C 11.939063 4.381103 -1.603535  
C 13.293984 4.996050 -1.864531  
H 11.844553 4.148514 -0.531966  
H 11.129970 5.087680 -1.845400  
C 11.104345 8.789597 -0.105521  
C 10.993363 9.948939 0.642084  
C 12.392377 8.174962 -0.266204  
H 10.012557 10.409444 0.782281  
C 12.117666 10.536653 1.282421  
C 13.505024 8.717985 0.353015  
C 13.397729 9.899109 1.139357  
C 12.011546 11.722250 2.060084  
H 11.033614 12.197167 2.166545  
H 14.488620 8.264785 0.229037  
C 14.525581 10.484185 1.779566  
C 13.127059 12.266540 2.669512  
C 13.587142 6.226033 -1.043784  
O 12.423849 7.086800 -1.090636  
C 14.391725 11.641454 2.525600  
H 15.501831 10.006289 1.671908  
H 13.038083 13.177656 3.263377  
H 15.266644 12.079229 3.009913  
H 13.773036 5.949687 0.009963  
H 14.476202 6.743870 -1.435075  
C 14.217562 4.474842 -2.680310  
H 14.050462 3.540253 -3.216098

H 15.181410 4.966421 -2.822879

### 3.3.26 CzU-BA acetate complex

153 -1

C 5.019396 4.805805 -0.162858  
C 3.667955 4.431794 -0.171015  
C 2.640619 5.261258 -0.691902  
H 3.422332 3.456384 0.241402  
C 2.974171 6.512190 -1.217700  
C 5.331520 6.079084 -0.695886  
C 4.320259 6.924377 -1.217990  
H 2.210603 7.172739 -1.626936  
C 4.990323 8.125120 -1.681471  
C 1.188445 4.744338 -0.649886  
C 0.192987 5.752897 -1.253179  
H 0.412814 5.962373 -2.310994  
H 0.194325 6.706893 -0.705036  
H -0.824734 5.338444 -1.200075  
C 0.775424 4.479636 0.818040  
H 0.831533 5.403663 1.413051  
H 1.423343 3.729095 1.293295  
H -0.259872 4.106646 0.860380  
C 1.083128 3.425022 -1.452152  
H 0.050317 3.043619 -1.423086  
H 1.741239 2.646107 -1.041249  
H 1.360108 3.584242 -2.505329  
N 6.573347 6.694406 -0.842464  
C 6.375616 7.940626 -1.417981  
H 7.425916 6.374976 -0.355832  
C 4.531696 9.319020 -2.264128

C 5.442157 10.329697 -2.593359  
H 3.465559 9.446716 -2.450263  
C 6.819526 10.115135 -2.340524  
C 7.310130 8.938125 -1.764223  
H 7.541211 10.886320 -2.599586  
C 5.005339 11.665379 -3.226678  
C 3.482720 11.734844 -3.446431  
H 2.927940 11.648419 -2.500404  
H 3.131254 10.944986 -4.127257  
H 3.222905 12.703860 -3.897729  
C 5.698716 11.841934 -4.598899  
H 5.420168 11.028952 -5.286454  
H 6.793861 11.848334 -4.504234  
H 5.395233 12.796441 -5.057095  
C 5.413817 12.833779 -2.297456  
H 5.114336 13.795474 -2.742220  
H 6.500842 12.861525 -2.134286  
H 4.924764 12.743070 -1.315776  
N 8.689835 8.687961 -1.554847  
C 9.654094 9.613788 -1.248821  
H 9.025520 7.730202 -1.694475  
O 9.394812 10.816604 -1.076286  
N 6.076777 4.014380 0.319828  
C 6.035165 2.682634 0.709023  
H 6.997165 4.488960 0.411131  
O 4.992718 2.029228 0.873314  
C 7.671298 0.950768 1.478289  
C 6.852700 0.232545 2.361130  
C 7.256996 -0.978786 2.976649  
H 5.860477 0.631392 2.560153  
C 8.532789 -1.485258 2.707476



C 8.952882 0.415143 1.215138  
C 9.383748 -0.784488 1.833217  
H 8.877115 -2.412400 3.164154  
C 10.729035 -1.036199 1.346851  
C 6.271623 -1.684780 3.929373  
C 6.849474 -2.993378 4.500111  
H 7.764608 -2.816183 5.085111  
H 7.081765 -3.718821 3.706074  
H 6.110715 -3.457302 5.170524  
C 4.967903 -2.025851 3.168973  
H 5.172771 -2.699860 2.323377  
H 4.478778 -1.124085 2.773286  
H 4.255533 -2.527530 3.842359  
C 5.937923 -0.747844 5.115161  
H 5.229706 -1.239551 5.800592  
H 5.480180 0.191529 4.774104  
H 6.846246 -0.497395 5.684270  
N 9.946339 0.882678 0.345971  
C 11.034227 0.016476 0.445411  
H 10.037785 1.893045 0.140425  
C 11.668989 -2.048135 1.607527  
C 12.911876 -2.018547 0.965908  
H 11.419084 -2.843015 2.309611  
C 13.179052 -0.987074 0.032515  
C 12.252112 0.021258 -0.271162  
H 14.127733 -0.968607 -0.496776  
C 14.000499 -3.079949 1.223124  
C 13.555657 -4.130860 2.257773  
H 12.666493 -4.685854 1.922215  
H 13.330062 -3.674788 3.233295  
H 14.365518 -4.859794 2.408849

C 15.277561 -2.387830 1.756369  
H 15.073849 -1.865509 2.703644  
H 15.669351 -1.651467 1.040057  
H 16.066026 -3.134210 1.939225  
C 14.333818 -3.815333 -0.097282  
H 15.112899 -4.573340 0.077802  
H 14.704496 -3.123158 -0.866787  
H 13.444088 -4.324370 -0.497902  
N 12.420642 0.969495 -1.306172  
C 13.551859 1.217733 -2.045123  
H 11.576698 1.445594 -1.642180  
O 14.673095 0.792353 -1.717230  
N 7.313179 2.170438 0.877291  
H 8.097174 2.751260 0.512910  
C 13.369519 1.967286 -3.346441  
C 14.440907 1.895282 -4.226708  
C 12.193072 2.678188 -3.778766  
C 12.120855 3.221364 -5.049534  
C 14.409691 2.456258 -5.525953  
C 13.213331 3.126826 -5.952401  
H 15.332951 1.361080 -3.895648  
H 11.227041 3.754350 -5.369747  
C 15.513944 2.364475 -6.419445  
C 13.168319 3.681730 -7.261536  
C 15.440678 2.914609 -7.685138  
H 16.419465 1.851935 -6.087383  
C 14.258264 3.576439 -8.106654  
H 12.260954 4.192182 -7.591721  
H 16.290588 2.841093 -8.365469  
H 14.211082 4.006185 -9.108966  
O 11.179677 2.787394 -2.855217

C 9.948025 3.483859 -3.190144  
C 10.098608 4.982560 -3.335059  
H 9.315398 3.272567 -2.316858  
H 9.494053 3.037651 -4.086834  
C 11.065236 9.100772 -1.070568  
C 11.945190 9.986610 -0.464410  
C 11.568334 7.803350 -1.446617  
H 11.561793 10.970654 -0.189771  
C 13.295188 9.665035 -0.187233  
C 12.880917 7.452601 -1.179409  
C 13.772658 8.359670 -0.547510  
C 14.183242 10.584395 0.439025  
H 13.811848 11.574950 0.710682  
H 13.261308 6.468334 -1.447301  
C 15.125431 8.022233 -0.265457  
C 15.493240 10.228552 0.698425  
C 11.111316 5.626307 -2.422033  
O 10.683807 6.965036 -2.087788  
C 15.964664 8.937887 0.343038  
H 15.493128 7.030659 -0.538204  
H 16.170183 10.937773 1.177464  
H 17.001082 8.667696 0.553528  
H 11.232995 5.037456 -1.499736  
H 12.086502 5.671704 -2.935385  
C 9.324436 5.671532 -4.182157  
H 8.617588 5.160995 -4.839148  
H 9.358787 6.759944 -4.233456  
C 10.811252 5.193676 1.473137  
O 9.565257 3.645070 0.109405  
C 9.551071 4.754049 0.742187  
O 8.518615 5.496744 0.831592

H 10.935427 6.283018 1.425845  
H 11.702598 4.690773 1.079861  
H 10.706345 4.919619 2.534800

### 3.3.27 CzU-BA benzoate complex

160 -1

C 5.006927 4.827952 -0.201767  
C 3.659397 4.440225 -0.235212  
C 2.633419 5.255373 -0.779815  
H 3.416567 3.463367 0.175211  
C 2.964325 6.507344 -1.304094  
C 5.316975 6.102803 -0.733835  
C 4.305617 6.933362 -1.278936  
H 2.202727 7.158342 -1.731931  
C 4.968311 8.139410 -1.737249  
C 1.186369 4.722836 -0.764514  
C 0.193009 5.716865 -1.394662  
H 0.433174 5.922913 -2.448717  
H 0.172318 6.673889 -0.852240  
H -0.821026 5.291512 -1.360810  
C 0.746091 4.462711 0.696280  
H 0.780232 5.390979 1.286364  
H 1.392126 3.722127 1.189316  
H -0.285857 4.078889 0.719899  
C 1.111680 3.397516 -1.560389  
H 0.082603 3.005272 -1.549985  
H 1.769440 2.628245 -1.131138  
H 1.408576 3.553184 -2.608684  
N 6.553774 6.734346 -0.861360  
C 6.351198 7.975788 -1.448293

H 7.400615 6.428808 -0.358421  
C 4.500548 9.319895 -2.339206  
C 5.401365 10.339749 -2.664703  
H 3.435761 9.428797 -2.543811  
C 6.776878 10.147248 -2.387260  
C 7.277398 8.983684 -1.790762  
H 7.491084 10.926271 -2.642617  
C 4.956484 11.661717 -3.320719  
C 3.436655 11.707469 -3.564814  
H 2.868562 11.624358 -2.626417  
H 3.106605 10.904908 -4.241515  
H 3.170635 12.667419 -4.031626  
C 5.668913 11.831254 -4.684068  
H 5.412638 11.005943 -5.365489  
H 6.762205 11.854362 -4.572142  
H 5.359410 12.775595 -5.159043  
C 5.334393 12.846690 -2.399659  
H 5.029418 13.798827 -2.861012  
H 6.418224 12.890982 -2.219647  
H 4.830790 12.761397 -1.424891  
N 8.658077 8.759081 -1.563515  
C 9.613097 9.709689 -1.304681  
H 9.007787 7.801240 -1.665102  
O 9.335971 10.914219 -1.172149  
N 6.059382 4.046597 0.307571  
C 6.018073 2.716389 0.699198  
H 6.973011 4.530137 0.426005  
O 4.979269 2.047573 0.817740  
C 7.628463 0.991208 1.527664  
C 6.791234 0.280309 2.398552  
C 7.172315 -0.940295 3.010463

H 5.803118 0.692280 2.591837  
C 8.444269 -1.462285 2.751851  
C 8.904401 0.439919 1.275740  
C 9.314104 -0.768237 1.891111  
H 8.770985 -2.396598 3.206853  
C 10.661721 -1.033367 1.417588  
C 6.167583 -1.638733 3.948386  
C 6.721673 -2.958431 4.516988  
H 7.632657 -2.797320 5.112992  
H 6.952862 -3.682023 3.720925  
H 5.969432 -3.416515 5.176300  
C 4.867776 -1.957454 3.171782  
H 5.072740 -2.628994 2.324221  
H 4.395279 -1.046695 2.776501  
H 4.141401 -2.453559 3.834210  
C 5.833616 -0.704524 5.136206  
H 5.111879 -1.191080 5.811129  
H 5.391535 0.242669 4.796127  
H 6.738987 -0.469283 5.716411  
N 9.911413 0.899196 0.417974  
C 10.989062 0.020279 0.525596  
H 10.016768 1.907832 0.223412  
C 11.587155 -2.057888 1.681329  
C 12.837175 -2.038774 1.053107  
H 11.320961 -2.853928 2.376010  
C 13.126935 -1.004116 0.129940  
C 12.215067 0.016932 -0.176161  
H 14.081785 -0.992354 -0.388452  
C 13.909810 -3.115465 1.313806  
C 13.442923 -4.165911 2.339093  
H 12.550069 -4.708283 1.992903

H 13.214272 -3.712025 3.314943  
H 14.242452 -4.905441 2.493510  
C 15.191352 -2.442907 1.861133  
H 14.986663 -1.922916 2.809451  
H 15.598977 -1.708089 1.152103  
H 15.968295 -3.200636 2.046446  
C 14.244167 -3.847849 -0.008001  
H 15.012284 -4.616548 0.168892  
H 14.629515 -3.156098 -0.770697  
H 13.351277 -4.343415 -0.418354  
N 12.406142 0.974042 -1.198637  
C 13.548738 1.221491 -1.920547  
H 11.570952 1.460723 -1.541474  
O 14.661560 0.779855 -1.586595  
N 7.293196 2.219761 0.930151  
H 8.090079 2.803382 0.603062  
C 13.386416 1.992069 -3.211957  
C 14.462368 1.917608 -4.086257  
C 12.221439 2.722992 -3.642064  
C 12.162339 3.279876 -4.907461  
C 14.445587 2.494358 -5.378908  
C 13.259055 3.182429 -5.805060  
H 15.345531 1.367955 -3.756676  
H 11.276807 3.827421 -5.226274  
C 15.554248 2.400431 -6.266695  
C 13.228135 3.752191 -7.108198  
C 15.494798 2.965514 -7.526531  
H 16.452075 1.874395 -5.934872  
C 14.322183 3.644703 -7.947750  
H 12.328312 4.275894 -7.438239  
H 16.348080 2.890477 -8.202446

H 14.285862 4.086258 -8.945364  
O 11.206707 2.838085 -2.720511  
C 9.969664 3.520387 -3.064523  
C 10.100541 5.019802 -3.219337  
H 9.335294 3.306681 -2.193008  
H 9.524878 3.063275 -3.960395  
C 11.036393 9.229345 -1.138541  
C 11.920377 10.166002 -0.620639  
C 11.550749 7.919190 -1.449022  
H 11.528123 11.159171 -0.395463  
C 13.285173 9.886526 -0.376169  
C 12.877017 7.607478 -1.204818  
C 13.773198 8.568366 -0.667210  
C 14.178332 10.860349 0.152691  
H 13.798272 11.860562 0.372481  
H 13.263276 6.611297 -1.413253  
C 15.141934 8.274060 -0.417877  
C 15.504054 10.545323 0.382398  
C 11.101307 5.688620 -2.310643  
O 10.661843 7.031199 -2.012496  
C 15.986171 9.241771 0.094587  
H 15.518123 7.272722 -0.638100  
H 16.185178 11.296396 0.786030  
H 17.035175 9.003671 0.280836  
H 11.221808 5.124938 -1.372531  
H 12.079367 5.727394 -2.818847  
C 9.318451 5.688048 -4.075925  
H 8.622811 5.159749 -4.730775  
H 9.335787 6.776212 -4.137644  
C 11.803018 7.048245 2.938626  
C 10.687159 6.578023 2.241985



H 9.766339 7.160812 2.203765  
H 11.759573 8.011370 3.450405  
O 8.455376 5.531398 0.871323  
C 12.977082 6.285964 2.979576  
C 10.732113 5.340372 1.577855  
C 9.515183 4.823610 0.845968  
H 13.849292 6.653865 3.522992  
C 13.031440 5.051638 2.320183  
C 11.914885 4.583172 1.622839  
O 9.595987 3.695037 0.252927  
H 13.945420 4.455556 2.350752  
H 11.945236 3.623180 1.106707

### 3.3.28 CzU-BA lactate complex

157 -1

C 5.025331 4.811980 -0.175059  
C 3.676202 4.431838 -0.194297  
C 2.648673 5.262964 -0.711030  
H 3.432268 3.450817 0.205245  
C 2.981117 6.521120 -1.219688  
C 5.337568 6.091515 -0.690246  
C 4.325189 6.938155 -1.207259  
H 2.217804 7.184036 -1.625486  
C 4.990925 8.147200 -1.654023  
C 1.198330 4.740304 -0.683623  
C 0.203194 5.751999 -1.282128  
H 0.429021 5.973996 -2.336095  
H 0.197456 6.699808 -0.723432  
H -0.813262 5.333233 -1.240157  
C 0.777709 4.458396 0.778912

H 0.827261 5.376165 1.384090  
H 1.425238 3.704829 1.249912  
H -0.256532 4.081593 0.811013  
C 1.102944 3.429419 -1.500830  
H 0.071298 3.044394 -1.482390  
H 1.760980 2.648218 -1.094171  
H 1.386048 3.600908 -2.550464  
N 6.578574 6.713422 -0.827182  
C 6.375805 7.967420 -1.388304  
H 7.426595 6.405637 -0.330231  
C 4.525844 9.343553 -2.225840  
C 5.430848 10.362870 -2.542501  
H 3.459421 9.465766 -2.413734  
C 6.808442 10.153083 -2.289001  
C 7.305331 8.972841 -1.724141  
H 7.526408 10.930429 -2.539731  
C 4.987629 11.702085 -3.163628  
C 3.464940 11.765018 -3.385043  
H 2.909261 11.665932 -2.440770  
H 3.118996 10.980111 -4.074340  
H 3.200279 12.737038 -3.826912  
C 5.682187 11.895444 -4.532978  
H 5.409348 11.087480 -5.228676  
H 6.777147 11.907214 -4.436528  
H 5.373869 12.852494 -4.982460  
C 5.388329 12.863632 -2.222531  
H 5.084105 13.827814 -2.658540  
H 6.474956 12.895854 -2.057538  
H 4.898399 12.760874 -1.242461  
N 8.686753 8.727649 -1.523203  
C 9.649842 9.657998 -1.227483

H 9.028036 7.773296 -1.674122  
O 9.384154 10.856551 -1.036146  
N 6.082144 4.016720 0.306569  
C 6.041023 2.682370 0.688709  
H 6.990676 4.495162 0.411291  
O 4.999731 2.024962 0.830487  
C 7.665877 0.947002 1.480622  
C 6.833156 0.222019 2.343531  
C 7.229892 -0.994410 2.953774  
H 5.837240 0.617488 2.530149  
C 8.510421 -1.497278 2.699355  
C 8.951553 0.417535 1.234630  
C 9.374549 -0.787799 1.845691  
H 8.847843 -2.428843 3.152046  
C 10.727817 -1.032486 1.376019  
C 6.230530 -1.711014 3.883606  
C 6.803050 -3.021910 4.454366  
H 7.707434 -2.846032 5.056199  
H 7.051063 -3.740850 3.659166  
H 6.054470 -3.493083 5.108529  
C 4.941923 -2.050458 3.097128  
H 5.164463 -2.716337 2.249588  
H 4.456178 -1.147154 2.700700  
H 4.219816 -2.560660 3.753420  
C 5.872451 -0.784326 5.070307  
H 5.154470 -1.284324 5.739291  
H 5.416559 0.155692 4.728600  
H 6.769504 -0.534551 5.657261  
N 9.955593 0.897113 0.382987  
C 11.043410 0.028899 0.490225  
H 10.063576 1.912336 0.224620

C 11.666621 -2.045509 1.636899  
C 12.917145 -2.006680 1.010248  
H 11.410256 -2.848447 2.327291  
C 13.192926 -0.967101 0.088274  
C 12.266386 0.041288 -0.215715  
H 14.146379 -0.943114 -0.432384  
C 14.005177 -3.067739 1.271312  
C 13.551958 -4.126898 2.293798  
H 12.668208 -4.682194 1.944720  
H 13.314322 -3.678203 3.269884  
H 14.362230 -4.854547 2.448790  
C 15.274769 -2.376228 1.822907  
H 15.059539 -1.860619 2.771303  
H 15.672771 -1.634287 1.115810  
H 16.062780 -3.122132 2.009335  
C 14.353966 -3.792823 -0.050788  
H 15.133043 -4.550114 0.127132  
H 14.730971 -3.094355 -0.811490  
H 13.469700 -4.301116 -0.464217  
N 12.435297 0.997273 -1.242627  
C 13.564331 1.251376 -1.982512  
H 11.588769 1.468822 -1.578782  
O 14.686703 0.825482 -1.659932  
N 7.316750 2.171536 0.880500  
H 8.104192 2.750214 0.541255  
C 13.375222 2.009766 -3.277646  
C 14.444542 1.949247 -4.161187  
C 12.193025 2.715590 -3.703175  
C 12.113608 3.264155 -4.971033  
C 14.406179 2.516690 -5.457383  
C 13.204055 3.180836 -5.877500

H 15.340578 1.418286 -3.835620  
H 11.215393 3.792874 -5.286207  
C 15.508499 2.436497 -6.354308  
C 13.151477 3.741422 -7.183867  
C 15.427856 2.991940 -7.617195  
H 16.418387 1.928572 -6.027171  
C 14.239773 3.647507 -8.032419  
H 12.239593 4.246848 -7.509272  
H 16.276301 2.927316 -8.300251  
H 14.186878 4.081457 -9.032628  
O 11.181254 2.815819 -2.775914  
C 9.937371 3.490506 -3.110484  
C 10.060964 4.991716 -3.255332  
H 9.307601 3.266605 -2.238507  
H 9.490812 3.036176 -4.006758  
C 11.070392 9.157536 -1.094654  
C 11.964913 10.059396 -0.535301  
C 11.571194 7.860329 -1.474537  
H 11.581725 11.042367 -0.256514  
C 13.328743 9.756560 -0.311121  
C 12.898241 7.528382 -1.259182  
C 13.806247 8.453484 -0.678595  
C 14.231552 10.693479 0.265972  
H 13.859896 11.682351 0.543306  
H 13.280232 6.546934 -1.535250  
C 15.174099 8.135427 -0.453051  
C 15.555972 10.356277 0.471282  
C 11.071614 5.645775 -2.348687  
O 10.670099 7.004254 -2.068121  
C 16.027605 9.067864 0.108241  
H 15.542669 7.146028 -0.732425

H 16.244363 11.078675 0.912823  
H 17.075686 8.812715 0.275261  
H 11.164328 5.089056 -1.403117  
H 12.053273 5.646978 -2.851042  
C 9.271079 5.667152 -4.098599  
H 8.569538 5.144166 -4.751359  
H 9.288438 6.755730 -4.152160  
H 10.415471 4.080136 2.826470  
C 10.516993 4.957063 2.158315  
O 9.632902 3.715780 0.270121  
C 9.495840 4.727979 1.024135  
O 10.172250 6.141826 2.892642  
O 8.531339 5.559409 0.960060  
H 9.342012 6.444327 2.452887  
C 11.959919 5.033382 1.664193  
H 12.229708 4.118746 1.119495  
H 12.641972 5.141988 2.518825  
H 12.095949 5.899350 1.000615

### 3.3.29 CzU-BA formate complex

150 -1

C 5.041756 4.833825 -0.117260  
C 3.694745 4.444299 -0.123527  
C 2.661019 5.248699 -0.670386  
H 3.458143 3.474681 0.307343  
C 2.982561 6.491144 -1.223430  
C 5.340787 6.098502 -0.677091  
C 4.323115 6.920311 -1.224960  
H 2.213516 7.131923 -1.653300  
C 4.982351 8.118224 -1.713282

C 1.214949 4.715026 -0.625782  
C 0.211678 5.696486 -1.259938  
H 0.436432 5.883177 -2.320998  
H 0.197602 6.663314 -0.734914  
H -0.801285 5.270989 -1.203842  
C 0.794779 4.480461 0.845231  
H 0.835057 5.419056 1.418341  
H 1.448461 3.749684 1.342798  
H -0.236093 4.095587 0.889286  
C 1.131534 3.375700 -1.396868  
H 0.103249 2.982371 -1.365734  
H 1.796049 2.614946 -0.962870  
H 1.414123 3.513148 -2.451579  
N 6.575859 6.724506 -0.833473  
C 6.366929 7.954510 -1.438086  
H 7.426261 6.442744 -0.324225  
C 4.518809 9.295296 -2.326312  
C 5.423783 10.306234 -2.671197  
H 3.453355 9.410655 -2.523683  
C 6.801927 10.110115 -2.405038  
C 7.296669 8.949695 -1.800378  
H 7.519180 10.881096 -2.677250  
C 4.980141 11.623152 -3.338467  
C 3.458266 11.675910 -3.567767  
H 2.899051 11.607376 -2.622902  
H 3.116269 10.867899 -4.231956  
H 3.193859 12.632134 -4.043048  
C 5.679653 11.771682 -4.710959  
H 5.411325 10.939831 -5.379696  
H 6.774140 11.789278 -4.610512  
H 5.371194 12.712180 -5.194159

C 5.374733 12.816647 -2.435613  
H 5.070659 13.764974 -2.905295  
H 6.460586 12.856825 -2.267303  
H 4.880742 12.746017 -1.454810  
N 8.674884 8.707164 -1.573983  
C 9.633625 9.635722 -1.259865  
H 9.011758 7.747310 -1.693401  
O 9.374440 10.842100 -1.116535  
N 6.104804 4.065268 0.392799  
C 6.085964 2.727349 0.761082  
H 7.014178 4.554765 0.501654  
O 5.057176 2.042753 0.870630  
C 7.716821 1.006037 1.549627  
C 6.904075 0.298789 2.446125  
C 7.291040 -0.930709 3.035254  
H 5.929934 0.722735 2.680674  
C 8.547110 -1.464294 2.727608  
C 8.975488 0.441730 1.245289  
C 9.393193 -0.774172 1.840950  
H 8.880101 -2.404913 3.164697  
C 10.719574 -1.053744 1.319368  
C 6.313718 -1.623586 4.005712  
C 6.869147 -2.957993 4.537567  
H 7.804940 -2.818013 5.099491  
H 7.058459 -3.675428 3.724931  
H 6.135966 -3.412486 5.220505  
C 4.978436 -1.913456 3.279790  
H 5.137208 -2.579651 2.418078  
H 4.505293 -0.991442 2.912595  
H 4.271618 -2.404405 3.966812  
C 6.043786 -0.696915 5.215472



H 5.342314 -1.178716 5.914697  
H 5.603885 0.260915 4.903061  
H 6.976012 -0.482198 5.760031  
N 9.958048 0.889750 0.353850  
C 11.029302 -0.000661 0.420248  
H 10.065547 1.889490 0.136549  
C 11.640933 -2.089336 1.550693  
C 12.870279 -2.082761 0.882788  
H 11.387674 -2.884313 2.251409  
C 13.142126 -1.047297 -0.044422  
C 12.233530 -0.014144 -0.317922  
H 14.081065 -1.044188 -0.591254  
C 13.936942 -3.174019 1.103726  
C 13.489347 -4.224101 2.137970  
H 12.578776 -4.752779 1.817765  
H 13.298426 -3.772808 3.123005  
H 14.283562 -4.974967 2.262688  
C 15.244135 -2.521258 1.613016  
H 15.077570 -2.005077 2.570790  
H 15.637770 -1.787174 0.895400  
H 16.016928 -3.290033 1.768244  
C 14.219355 -3.903231 -0.231813  
H 14.982217 -4.683279 -0.083225  
H 14.589858 -3.212549 -1.002747  
H 13.307461 -4.384668 -0.616322  
N 12.409889 0.943884 -1.342903  
C 13.549620 1.202130 -2.065596  
H 11.569210 1.422119 -1.683047  
O 14.667059 0.773798 -1.729983  
N 7.369155 2.245293 0.980158  
H 8.159495 2.837356 0.652788

C 13.380149 1.966179 -3.359790  
C 14.452361 1.889198 -4.238473  
C 12.213574 2.695387 -3.786991  
C 12.149052 3.249412 -5.053257  
C 14.429653 2.461541 -5.532988  
C 13.241552 3.148882 -5.955652  
H 15.337388 1.341412 -3.910862  
H 11.262440 3.795925 -5.370535  
C 15.534028 2.364353 -6.425715  
C 13.204384 3.714359 -7.260442  
C 15.468595 2.925222 -7.687128  
H 16.433282 1.839123 -6.096528  
C 14.294229 3.603425 -8.104985  
H 12.303248 4.237502 -7.587765  
H 16.318557 2.847572 -8.366921  
H 14.253137 4.041354 -9.104009  
O 11.201079 2.810670 -2.861940  
C 9.975056 3.514334 -3.198221  
C 10.131138 5.013398 -3.340284  
H 9.334860 3.297794 -2.331706  
H 9.521220 3.073310 -4.097581  
C 11.035295 9.117251 -1.029373  
C 11.896341 9.998730 -0.391048  
C 11.545074 7.816264 -1.384275  
H 11.509023 10.985668 -0.132611  
C 13.232661 9.668912 -0.061008  
C 12.844315 7.457573 -1.066934  
C 13.715818 8.360026 -0.400294  
C 14.100737 10.583155 0.599639  
H 13.725349 11.576535 0.854927  
H 13.228106 6.470634 -1.320330

C 15.054046 8.014397 -0.064272  
C 15.396934 10.219180 0.911902  
C 11.141773 5.661446 -2.426740  
O 10.681862 6.981342 -2.057823  
C 15.873897 8.925125 0.577264  
H 15.425897 7.020147 -0.321190  
H 16.058487 10.924571 1.417362  
H 16.899121 8.648346 0.829801  
H 11.295683 5.055727 -1.520442  
H 12.109366 5.748764 -2.949504  
C 9.359850 5.702871 -4.189809  
H 8.652479 5.193528 -4.847156  
H 9.397703 6.791100 -4.243174  
O 9.673006 3.717072 0.229507  
C 9.610048 4.910874 0.649653  
O 8.548628 5.579225 0.840358  
H 10.575044 5.421226 0.878670

### 3.3.30 CzU-BA sorbate complex

161 -1

C 5.061203 4.756726 0.174031  
C 3.756705 4.249510 0.093113  
C 2.668787 4.992976 -0.437078  
H 3.601596 3.229100 0.435224  
C 2.891066 6.293524 -0.898075  
C 5.254962 6.082184 -0.283020  
C 4.186815 6.840173 -0.827549  
H 2.081116 6.885195 -1.323867  
C 4.761620 8.101309 -1.256857  
C 1.279482 4.325930 -0.487154

C 0.206336 5.255147 -1.084427  
H 0.443669 5.542787 -2.119719  
H 0.084906 6.173733 -0.491029  
H -0.762885 4.734389 -1.096735  
C 0.838073 3.939180 0.944823  
H 0.769047 4.830695 1.586663  
H 1.544489 3.237921 1.411849  
H -0.151245 3.455863 0.921713  
C 1.348900 3.048449 -1.358548  
H 0.362909 2.559436 -1.396709  
H 2.070602 2.322279 -0.957593  
H 1.650197 3.293118 -2.388747  
N 6.429460 6.814204 -0.369077  
C 6.158386 8.028062 -0.967732  
H 7.320471 6.536923 0.061847  
C 4.205165 9.261452 -1.820270  
C 5.022907 10.358776 -2.115552  
H 3.133777 9.297156 -2.016462  
C 6.409656 10.248677 -1.856091  
C 7.003502 9.106864 -1.303358  
H 7.070750 11.080763 -2.108071  
C 4.476635 11.664410 -2.725337  
C 2.951265 11.614115 -2.932996  
H 2.414078 11.463850 -1.984549  
H 2.658597 10.812120 -3.627183  
H 2.609816 12.567567 -3.362329  
C 5.143072 11.914667 -4.099550  
H 4.926505 11.090627 -4.796152  
H 6.235020 12.008419 -4.011410  
H 4.759925 12.847205 -4.542773  
C 4.797154 12.849497 -1.782962

H 4.415297 13.789104 -2.211486  
H 5.879729 12.965687 -1.629126  
H 4.326799 12.706006 -0.798311  
N 8.404551 9.104374 -1.081108  
C 9.257258 8.053869 -1.372180  
H 8.831887 10.018309 -0.941869  
O 8.850276 6.977576 -1.819550  
N 6.180001 4.056527 0.661826  
C 6.313544 2.685997 0.798410  
H 7.001693 4.640955 0.954570  
O 5.383968 1.874128 0.640554  
C 7.926606 1.035883 1.641476  
C 7.181734 0.465673 2.680915  
C 7.473698 -0.794962 3.254301  
H 6.328628 1.035881 3.049286  
C 8.576207 -1.505153 2.767509  
C 9.034626 0.304925 1.168158  
C 9.355622 -0.958793 1.733963  
H 8.838357 -2.481191 3.175212  
C 10.502083 -1.462058 1.005366  
C 6.577191 -1.326574 4.389284  
C 7.051896 -2.694379 4.913708  
H 8.072875 -2.644568 5.321231  
H 7.031570 -3.464118 4.127491  
H 6.385099 -3.027149 5.723099  
C 5.127702 -1.482979 3.870331  
H 5.085125 -2.201678 3.037493  
H 4.719242 -0.526586 3.513916  
H 4.472647 -1.851901 4.675166  
C 6.588060 -0.327185 5.571192  
H 5.948955 -0.698247 6.387504

H 6.211176 0.661460 5.272195  
H 7.607393 -0.197981 5.965738  
N 9.912881 0.570696 0.117658  
C 10.821487 -0.477888 0.024669  
H 10.127487 1.486838 -0.284469  
C 11.212578 -2.669675 1.089315  
C 12.260366 -2.924196 0.198585  
H 10.930253 -3.402385 1.844533  
C 12.554711 -1.942235 -0.773114  
C 11.860184 -0.729184 -0.893295  
H 13.359205 -2.124972 -1.488170  
C 13.091200 -4.221298 0.233440  
C 12.630885 -5.172257 1.354100  
H 11.584331 -5.485431 1.221836  
H 12.730630 -4.711166 2.348298  
H 13.254044 -6.078446 1.341851  
C 14.580019 -3.874626 0.474447  
H 14.710875 -3.351875 1.434071  
H 14.982508 -3.230938 -0.320966  
H 15.183234 -4.795078 0.499771  
C 12.952594 -4.962308 -1.118363  
H 13.546362 -5.889126 -1.104507  
H 13.307671 -4.348072 -1.958386  
H 11.902829 -5.229994 -1.312363  
N 12.217782 0.097637 -1.992928  
C 12.291127 1.468226 -2.090608  
H 12.647044 -0.412812 -2.762940  
O 11.798321 2.244112 -1.258161  
N 7.612087 2.306792 1.103150  
H 8.375982 3.031134 1.131436  
C 13.071068 1.906086 -3.307451

C 14.265554 1.260678 -3.595140  
C 12.625715 2.959569 -4.181624  
C 13.337353 3.234437 -5.340432  
C 15.045482 1.567626 -4.738223  
C 14.549226 2.560995 -5.646500  
H 14.635985 0.488440 -2.916784  
H 12.986521 3.998477 -6.030854  
C 16.272108 0.907330 -5.023260  
C 15.303391 2.851709 -6.817816  
C 16.983439 1.213867 -6.167862  
H 16.640504 0.152332 -4.324904  
C 16.492214 2.192247 -7.070104  
H 14.931757 3.606060 -7.514959  
H 17.923438 0.703100 -6.383285  
H 17.061840 2.425690 -7.971674  
O 11.488471 3.614519 -3.805767  
C 10.861415 4.541194 -4.729615  
C 11.627255 5.818426 -5.014392  
H 9.917956 4.785509 -4.222096  
H 10.626509 4.022904 -5.673249  
C 10.704231 8.326190 -1.076085  
C 11.071175 9.061126 0.039349  
C 11.737218 7.774260 -1.915578  
H 10.296743 9.453163 0.701586  
C 12.428202 9.294507 0.384180  
C 13.071731 7.978524 -1.597758  
C 13.449825 8.734953 -0.455432  
C 12.802476 10.057523 1.523697  
H 12.017656 10.474271 2.158187  
H 13.862495 7.575219 -2.229172  
C 14.812899 8.966351 -0.118133

C 14.135647 10.269235 1.823351  
C 12.327871 6.511823 -3.877528  
O 11.316585 7.104734 -3.026044  
C 15.146032 9.717125 0.995074  
H 15.594500 8.543924 -0.753668  
H 14.416013 10.859306 2.697390  
H 16.196039 9.887648 1.240699  
H 12.922882 5.797729 -3.283903  
H 12.996081 7.294589 -4.269244  
C 11.624641 6.354079 -6.243139  
H 11.143620 5.852227 -7.086255  
H 12.104210 7.314187 -6.443990  
C 10.799038 7.869672 4.260055  
C 10.407168 8.968194 4.944920  
C 11.264754 9.747962 5.888183  
C 9.936367 7.137748 3.359094  
C 10.283979 6.012016 2.692421  
C 9.339206 5.243852 1.829954  
O 9.718356 4.089880 1.441264  
H 12.277334 9.327810 5.964180  
H 10.819917 9.771549 6.897344  
H 11.346657 10.800343 5.568345  
H 11.823088 7.498571 4.387732  
H 9.379648 9.326576 4.807549  
H 8.919851 7.520398 3.213137  
H 11.283561 5.583145 2.811757  
O 8.194268 5.755930 1.560637



### 3.3.31 CzU-BB free receptor

148 0

|   |          |           |           |
|---|----------|-----------|-----------|
| C | 6.038726 | 4.618674  | -0.734647 |
| C | 5.125827 | 3.751873  | -1.340878 |
| C | 4.191335 | 4.181669  | -2.316029 |
| H | 5.151720 | 2.704341  | -1.045716 |
| C | 4.153348 | 5.537167  | -2.662582 |
| C | 6.010055 | 5.970253  | -1.125597 |
| C | 5.051303 | 6.436708  | -2.063386 |
| H | 3.437702 | 5.904844  | -3.397354 |
| C | 5.285590 | 7.862107  | -2.216933 |
| C | 3.245841 | 3.140260  | -2.944524 |
| C | 2.290236 | 3.769159  | -3.975007 |
| H | 2.835744 | 4.235120  | -4.809270 |
| H | 1.639778 | 4.530697  | -3.519033 |
| H | 1.641690 | 2.987015  | -4.396717 |
| C | 2.392284 | 2.476993  | -1.837449 |
| H | 1.777940 | 3.225370  | -1.313923 |
| H | 3.017120 | 1.967325  | -1.090341 |
| H | 1.716559 | 1.727485  | -2.278372 |
| C | 4.082961 | 2.053434  | -3.660464 |
| H | 3.419491 | 1.296142  | -4.106060 |
| H | 4.762609 | 1.539659  | -2.965378 |
| H | 4.691019 | 2.493950  | -4.465032 |
| N | 6.835819 | 7.023120  | -0.751609 |
| C | 6.393119 | 8.177256  | -1.380174 |
| H | 7.422876 | 7.083660  | 0.083649  |
| C | 4.688626 | 8.851258  | -3.014862 |
| C | 5.181350 | 10.161960 | -2.991553 |
| H | 3.848798 | 8.584494  | -3.655873 |
| C | 6.300771 | 10.443589 | -2.173522 |

C 6.930475 9.478630 -1.379103  
H 6.722249 11.450824 -2.164329  
C 4.562601 11.297886 -3.828256  
C 3.355318 10.817887 -4.654639  
H 2.550672 10.427561 -4.013408  
H 3.635483 10.034282 -5.374119  
H 2.945662 11.663778 -5.225700  
C 5.623372 11.862821 -4.802824  
H 5.980312 11.081132 -5.490166  
H 6.493617 12.270365 -4.268608  
H 5.188533 12.675789 -5.404869  
C 4.084392 12.428150 -2.885313  
H 3.641866 13.248545 -3.471308  
H 4.914044 12.844864 -2.296554  
H 3.320973 12.057977 -2.184313  
N 8.149330 9.822990 -0.731816  
C 8.676814 9.312141 0.414436  
H 8.727900 10.503167 -1.223852  
O 8.059024 8.560123 1.191747  
N 6.936577 4.222443 0.290383  
C 7.479311 2.961056 0.464585  
H 7.027207 4.871183 1.069638  
O 7.488275 2.091886 -0.424189  
C 8.513495 1.577257 2.287347  
C 8.302951 1.377390 3.659345  
C 8.785648 0.254600 4.369610  
H 7.736183 2.143811 4.192707  
C 9.500236 -0.719190 3.663284  
C 9.247961 0.594175 1.598559  
C 9.720545 -0.556123 2.286435  
H 9.891013 -1.602421 4.167178

C 10.426027 -1.359841 1.304431  
C 8.500136 0.145536 5.879995  
C 9.097861 -1.135295 6.491449  
H 10.192390 -1.168260 6.383400  
H 8.677989 -2.043173 6.033153  
H 8.867354 -1.167373 7.566611  
C 6.970753 0.126789 6.117228  
H 6.506277 -0.733286 5.611700  
H 6.489153 1.041902 5.743909  
H 6.756022 0.048679 7.194293  
C 9.114299 1.362877 6.611763  
H 8.913592 1.295806 7.692269  
H 8.692718 2.311798 6.250126  
H 10.204897 1.397811 6.467413  
N 9.678183 0.553211 0.270268  
C 10.354436 -0.654098 0.078011  
H 9.084822 1.019944 -0.427141  
C 11.087750 -2.597410 1.380735  
C 11.678635 -3.136099 0.233436  
H 11.128853 -3.124625 2.333290  
C 11.618909 -2.404089 -0.977869  
C 10.986801 -1.156286 -1.080444  
H 12.086071 -2.800163 -1.875403  
C 12.406166 -4.495458 0.238415  
C 12.388022 -5.159751 1.628013  
H 11.362242 -5.356822 1.974066  
H 12.895367 -4.541872 2.384022  
H 12.914705 -6.124073 1.578099  
C 13.882280 -4.295876 -0.182269  
H 14.401742 -3.623945 0.517770  
H 13.963280 -3.864891 -1.190403

H 14.409536 -5.262220 -0.185037  
C 11.716549 -5.451626 -0.763839  
H 12.230170 -6.425443 -0.773517  
H 11.735453 -5.050186 -1.787280  
H 10.665543 -5.621391 -0.484370  
N 10.993363 -0.350503 -2.238020  
C 11.368293 -0.692928 -3.512877  
H 10.761088 0.641802 -2.118186  
O 11.652361 -1.858800 -3.838984  
N 8.036747 2.785557 1.718789  
H 7.822043 3.502126 2.410531  
C 11.454079 0.429730 -4.522492  
C 11.933628 0.065997 -5.774003  
C 11.107764 1.814004 -4.311792  
C 11.277171 2.743879 -5.323481  
C 12.103553 0.987540 -6.833412  
C 11.768795 2.364581 -6.599687  
H 12.190281 -0.983307 -5.929754  
H 11.034105 3.793036 -5.159304  
C 12.595994 0.596294 -8.110529  
C 11.944992 3.301536 -7.656051  
C 12.753660 1.528845 -9.117708  
H 12.847409 -0.453199 -8.279583  
C 12.425817 2.890149 -8.885541  
H 11.693313 4.350246 -7.483205  
H 13.130950 1.223227 -10.094927  
H 12.555301 3.618075 -9.688648  
O 10.602333 2.137612 -3.075540  
C 10.088962 3.469733 -2.803274  
C 11.156740 4.422622 -2.271932  
H 9.315289 3.298564 -2.042033

H 9.591419 3.860409 -3.702805  
C 10.123904 9.671010 0.653762  
C 10.515572 10.758050 1.403957  
C 11.105651 8.767545 0.126551  
H 9.765354 11.441126 1.808760  
C 11.892954 11.008982 1.666756  
C 12.451657 8.978419 0.366089  
H 11.962560 6.215849 -0.283193  
C 12.873956 10.098807 1.138008  
C 12.322028 12.125680 2.434163  
H 11.569737 12.810305 2.832681  
H 13.205253 8.298003 -0.031652  
C 14.249009 10.352814 1.403069  
C 13.666755 12.344057 2.674117  
C 10.483252 5.720823 -1.808990  
C 11.424289 6.696765 -1.117017  
O 10.571117 7.743760 -0.597553  
C 14.635003 11.449570 2.152774  
H 14.998779 9.666227 1.003520  
H 13.986046 13.204461 3.264613  
H 15.694288 11.629680 2.345836  
H 12.160600 7.125997 -1.816625  
H 10.009902 6.228355 -2.663668  
H 9.678334 5.476026 -1.097545  
H 11.913909 4.628748 -3.043296  
H 11.671656 3.940163 -1.426063

### 3.3.32 CzU-BB acetate complex

155 -1

C -2.940476 0.394785 -0.022952

C -3.903909 -0.399191 -0.660379  
C -4.807929 0.110025 -1.627384  
H -3.939005 -1.453804 -0.394180  
C -4.758242 1.468452 -1.958130  
C -2.889662 1.756827 -0.398395  
C -3.803476 2.296862 -1.339112  
H -5.444502 1.892864 -2.690148  
C -3.476821 3.707549 -1.463645  
C -5.817706 -0.860223 -2.272224  
C -6.732075 -0.157395 -3.292394  
H -6.158122 0.285254 -4.120236  
H -7.332026 0.637301 -2.824109  
H -7.429680 -0.890153 -3.725060  
C -6.712649 -1.485211 -1.175670  
H -7.278350 -0.707037 -0.640773  
H -6.121168 -2.043693 -0.436328  
H -7.434853 -2.183860 -1.626903  
C -5.053482 -1.987829 -3.006613  
H -5.764332 -2.693593 -3.464150  
H -4.408822 -2.555972 -2.320710  
H -4.418615 -1.574825 -3.805414  
N -2.001842 2.750070 0.016963  
C -2.365947 3.934399 -0.611749  
H -1.487812 2.691955 0.914379  
C -4.021994 4.770881 -2.206549  
C -3.456750 6.047890 -2.110430  
H -4.883063 4.588943 -2.849004  
C -2.309186 6.237262 -1.297724  
C -1.726948 5.192712 -0.568079  
H -1.833760 7.213608 -1.242901  
C -4.023693 7.260631 -2.875700

C -5.269649 6.896752 -3.704613  
H -6.085606 6.517802 -3.070690  
H -5.046120 6.138930 -4.469931  
H -5.638834 7.794615 -4.221935  
C -2.949046 7.817297 -3.840022  
H -2.649966 7.054973 -4.575141  
H -2.047560 8.143290 -3.301500  
H -3.344988 8.685965 -4.389194  
C -4.421922 8.364713 -1.866761  
H -4.823184 9.240375 -2.400546  
H -3.561223 8.698503 -1.270059  
H -5.196460 8.001977 -1.174061  
N -0.504633 5.267088 0.131427  
C 0.272923 6.362555 0.398112  
H -0.034888 4.371078 0.311198  
O -0.125760 7.529755 0.232897  
N -2.073557 -0.053166 0.987528  
C -1.746151 -1.359185 1.291217  
H -1.634197 0.684729 1.596598  
O -1.928516 -2.327697 0.520596  
C -0.662542 -2.671614 3.092351  
C -0.841309 -2.937455 4.458369  
C -0.285062 -4.063671 5.110863  
H -1.432666 -2.220937 5.030967  
C 0.471359 -4.970772 4.357334  
C 0.114444 -3.590077 2.363548  
C 0.666891 -4.739316 2.985188  
H 0.918948 -5.847857 4.823406  
C 1.423510 -5.435876 1.955193  
C -0.533152 -4.247478 6.621396  
C 0.128020 -5.526436 7.168363

H 1.220832 -5.509669 7.040455  
H -0.263262 -6.431154 6.679454  
H -0.080222 -5.612594 8.245221  
C -2.054606 -4.338229 6.890720  
H -2.495983 -5.195872 6.360807  
H -2.580725 -3.429448 6.565241  
H -2.241520 -4.467935 7.968111  
C 0.048167 -3.036882 7.390460  
H -0.127514 -3.153648 8.471215  
H -0.416819 -2.092149 7.073986  
H 1.133394 -2.953203 7.226767  
N 0.538850 -3.517118 1.033713  
C 1.303145 -4.658556 0.778388  
H -0.125867 -3.120620 0.357353  
C 2.176796 -6.622638 1.940169  
C 2.808405 -7.029388 0.758024  
H 2.260138 -7.216238 2.850037  
C 2.707841 -6.211953 -0.395322  
C 1.985862 -5.010832 -0.401526  
H 3.216442 -6.498640 -1.312561  
C 3.631823 -8.329933 0.668326  
C 3.650678 -9.101537 2.001204  
H 2.639146 -9.396985 2.317424  
H 4.107230 -8.511623 2.810102  
H 4.245092 -10.019701 1.883125  
C 5.093200 -7.994432 0.284968  
H 5.556855 -7.342871 1.041231  
H 5.153129 -7.483448 -0.686515  
H 5.688062 -8.918309 0.217457  
C 3.020486 -9.251047 -0.414314  
H 3.604719 -10.180775 -0.494969



H 3.015362 -8.768931 -1.402458  
H 1.983477 -9.519232 -0.161148  
N 1.954687 -4.086168 -1.466986  
C 2.296387 -4.283967 -2.778491  
H 1.755514 -3.109931 -1.218801  
O 2.583272 -5.404461 -3.234848  
N -1.178843 -1.478866 2.544555  
H -1.242165 -0.654569 3.196180  
C 2.300382 -3.060258 -3.667810  
C 2.523433 -3.311318 -5.015192  
C 2.107431 -1.688338 -3.260964  
C 2.153573 -0.668012 -4.196104  
C 2.571138 -2.292221 -5.994396  
C 2.379379 -0.933355 -5.571971  
H 2.670415 -4.350356 -5.315608  
H 2.019462 0.369467 -3.893511  
C 2.800592 -2.569131 -7.371738  
C 2.428657 0.101278 -6.547277  
C 2.841917 -1.542985 -8.296078  
H 2.944873 -3.605726 -7.684382  
C 2.654226 -0.199663 -7.877922  
H 2.284257 1.136618 -6.230886  
H 3.018822 -1.760601 -9.350682  
H 2.689154 0.602732 -8.617229  
O 1.873676 -1.465320 -1.922526  
C 1.651782 -0.114419 -1.429057  
C 2.958932 0.639951 -1.180176  
H 1.092832 -0.273242 -0.498452  
H 0.995686 0.424438 -2.129274  
C 1.673815 6.084745 0.900189  
C 2.404116 7.200930 1.284444

C 2.328895 4.797883 0.959999  
H 1.907264 8.171629 1.233729  
C 3.750130 7.131371 1.714774  
C 3.652619 4.699558 1.352907  
H 1.236551 1.735137 0.702558  
C 4.392988 5.846357 1.741447  
C 4.483160 8.286211 2.108937  
H 3.986437 9.258883 2.085483  
H 4.152088 3.731158 1.376946  
C 5.751230 5.769125 2.159216  
C 5.800244 8.178551 2.512507  
C 2.723573 2.129654 -0.862202  
C 2.112323 2.369735 0.518526  
O 1.562419 3.711418 0.625209  
C 6.436011 6.909793 2.536198  
H 6.245374 4.795233 2.179737  
H 6.356959 9.067548 2.813381  
H 7.477385 6.836938 2.855383  
H 2.829432 2.187443 1.331372  
H 3.678337 2.668245 -0.944342  
H 2.049334 2.562384 -1.619149  
H 3.589674 0.575482 -2.078215  
H 3.515118 0.150237 -0.365959  
C -0.761988 3.080916 4.555274  
O -1.236326 0.732943 4.285542  
C -0.979274 1.834247 3.706140  
O -0.904550 1.968058 2.435073  
H 0.075154 3.670885 4.159679  
H -0.580253 2.825481 5.606144  
H -1.662593 3.711483 4.497186

### 3.3.33 CzU-BB benzoate complex

162 -1

|   |           |           |           |
|---|-----------|-----------|-----------|
| C | -3.808054 | 0.546757  | -0.108289 |
| C | -5.046912 | -0.042912 | -0.399409 |
| C | -6.125467 | 0.667088  | -0.986564 |
| H | -5.163335 | -1.094852 | -0.150948 |
| C | -5.956055 | 2.017242  | -1.300489 |
| C | -3.663799 | 1.922019  | -0.416289 |
| C | -4.727899 | 2.642843  | -1.017256 |
| H | -6.759171 | 2.594962  | -1.757350 |
| C | -4.250567 | 3.997252  | -1.206165 |
| C | -7.443025 | -0.086003 | -1.256613 |
| C | -8.512993 | 0.820393  | -1.892898 |
| H | -8.185764 | 1.220080  | -2.864387 |
| H | -8.771006 | 1.668225  | -1.240517 |
| H | -9.431405 | 0.238893  | -2.063114 |
| C | -8.006633 | -0.634386 | 0.076448  |
| H | -8.215223 | 0.185444  | 0.780525  |
| H | -7.302547 | -1.326365 | 0.560462  |
| H | -8.946429 | -1.179849 | -0.103066 |
| C | -7.179019 | -1.268600 | -2.219321 |
| H | -8.114198 | -1.817187 | -2.413184 |
| H | -6.452176 | -1.979710 | -1.800925 |
| H | -6.786749 | -0.908879 | -3.182637 |
| N | -2.562528 | 2.762273  | -0.258227 |
| C | -2.919046 | 4.028327  | -0.709894 |
| H | -1.749994 | 2.596976  | 0.388818  |
| C | -4.848996 | 5.149251  | -1.744977 |
| C | -4.124954 | 6.342511  | -1.790607 |
| H | -5.871468 | 5.096822  | -2.118273 |
| C | -2.796388 | 6.358141  | -1.297009 |

C -2.161291 5.225272 -0.763807  
H -2.218972 7.276763 -1.329797  
C -4.712628 7.648369 -2.361451  
C -6.161768 7.468258 -2.851199  
H -6.833657 7.157145 -2.037056  
H -6.231749 6.724426 -3.659277  
H -6.535749 8.424760 -3.245408  
C -3.854891 8.122652 -3.559144  
H -3.848821 7.367958 -4.360759  
H -2.812910 8.311303 -3.263320  
H -4.263325 9.057966 -3.972341  
C -4.705978 8.742722 -1.267413  
H -5.118140 9.682437 -1.666824  
H -3.688715 8.948485 -0.904779  
H -5.319442 8.438622 -0.405570  
N -0.820811 5.215809 -0.307703  
C 0.080144 6.251616 -0.314689  
H -0.455936 4.317556 0.026957  
O -0.215896 7.415178 -0.642393  
N -2.711817 -0.139219 0.443880  
C -2.691109 -1.421081 0.976572  
H -1.790441 0.338724 0.436524  
O -3.690791 -2.139252 1.131558  
C -1.070198 -2.960292 2.068793  
C -1.782958 -3.373016 3.198968  
C -1.379991 -4.465652 4.006235  
H -2.680002 -2.811652 3.459256  
C -0.206519 -5.152087 3.672571  
C 0.079802 -3.694746 1.731531  
C 0.527407 -4.771381 2.536354  
H 0.141059 -5.988829 4.277955

C 1.721277 -5.295526 1.897799  
C -2.238303 -4.842298 5.229113  
C -1.656240 -6.039419 6.002848  
H -0.649714 -5.824980 6.392385  
H -1.599217 -6.942807 5.377410  
H -2.304105 -6.269026 6.861918  
C -3.665255 -5.215923 4.761263  
H -3.641097 -6.081668 4.082107  
H -4.150732 -4.382760 4.233294  
H -4.292854 -5.477922 5.627355  
C -2.320594 -3.637315 6.196736  
H -2.934083 -3.896801 7.073645  
H -2.775459 -2.759016 5.716875  
H -1.319109 -3.350722 6.552258  
N 0.953407 -3.526461 0.657206  
C 1.924050 -4.524470 0.722428  
H 0.684161 -3.040169 -0.193675  
C 2.594434 -6.348758 2.217489  
C 3.665733 -6.645174 1.368020  
H 2.422246 -6.928323 3.123955  
C 3.838132 -5.873911 0.192632  
C 2.985235 -4.819170 -0.158050  
H 4.656189 -6.101420 -0.485558  
C 4.665059 -7.781859 1.660246  
C 4.338361 -8.520610 2.971705  
H 3.343029 -8.988931 2.941338  
H 4.377021 -7.847796 3.841590  
H 5.077906 -9.318392 3.134434  
C 6.093291 -7.197124 1.778498  
H 6.151829 -6.468072 2.601140  
H 6.403918 -6.691454 0.852931

H 6.816825 -8.001676 1.982439  
C 4.630388 -8.810169 0.504726  
H 5.346395 -9.623535 0.699872  
H 4.897005 -8.350132 -0.457556  
H 3.627866 -9.253046 0.403836  
N 3.144611 -4.043971 -1.331859  
C 3.654079 -4.472804 -2.532999  
H 2.812171 -3.074299 -1.325369  
O 4.085171 -5.625971 -2.700521  
N -1.401019 -1.822559 1.294596  
H -0.662111 -1.104302 1.183924  
C 3.652987 -3.482924 -3.676801  
C 4.125760 -3.981563 -4.884049  
C 3.192889 -2.116436 -3.646639  
C 3.214067 -1.344770 -4.797144  
C 4.167917 -3.217373 -6.073062  
C 3.693299 -1.862746 -6.028293  
H 4.471814 -5.016202 -4.899693  
H 2.865288 -0.313521 -4.780404  
C 4.655754 -3.746037 -7.301648  
C 3.727277 -1.084572 -7.219266  
C 4.675409 -2.966192 -8.442061  
H 5.014205 -4.777472 -7.326667  
C 4.207163 -1.626715 -8.397416  
H 3.368579 -0.053545 -7.190032  
H 5.050092 -3.376210 -9.381353  
H 4.227888 -1.020344 -9.304837  
O 2.731215 -1.645181 -2.439523  
C 2.259029 -0.272501 -2.324124  
C 3.405416 0.730774 -2.190698  
H 1.638902 -0.293081 -1.419252

H 1.603414 -0.039459 -3.176897  
C 1.480694 5.944434 0.154345  
C 2.126988 6.952112 0.853705  
C 2.196445 4.731353 -0.128222  
H 1.584501 7.879749 1.046830  
C 3.453309 6.815301 1.330754  
C 3.501975 4.574747 0.309324  
H 1.109887 1.828409 -0.971509  
C 4.154918 5.592517 1.052366  
C 4.107197 7.842882 2.066863  
H 3.564745 8.768027 2.275485  
H 4.060050 3.667379 0.079900  
C 5.492317 5.451988 1.518310  
C 5.406175 7.675033 2.507744  
C 2.906715 2.188310 -2.149426  
C 2.018867 2.440084 -0.933610  
O 1.515492 3.798636 -0.862319  
C 6.101430 6.469800 2.228780  
H 6.031629 4.525599 1.308192  
H 5.901825 8.467445 3.071124  
H 7.127553 6.347423 2.580998  
H 2.544284 2.194679 0.002924  
H 3.777819 2.859571 -2.132742  
H 2.339981 2.419426 -3.065534  
H 4.099200 0.618833 -3.035757  
H 3.977046 0.500972 -1.277427  
C 2.325912 2.467273 4.672761  
C 1.388141 2.558285 3.641196  
H 0.788352 3.459476 3.509008  
H 2.461758 3.303607 5.361382  
O -0.460584 2.681996 1.517057

|   |           |           |          |
|---|-----------|-----------|----------|
| C | 3.093501  | 1.305400  | 4.822527 |
| C | 1.200999  | 1.487240  | 2.751495 |
| C | 0.170495  | 1.583780  | 1.647699 |
| H | 3.827413  | 1.233924  | 5.627801 |
| C | 2.919104  | 0.235558  | 3.935499 |
| C | 1.976668  | 0.326530  | 2.907548 |
| O | -0.014215 | 0.563609  | 0.901581 |
| H | 3.519077  | -0.669743 | 4.047613 |
| H | 1.832056  | -0.500422 | 2.211093 |

### 3.3.34 CzU-BB lactate complex

159 -1

|   |           |           |           |
|---|-----------|-----------|-----------|
| C | -2.952612 | 0.339957  | -0.151740 |
| C | -3.938159 | -0.443395 | -0.766375 |
| C | -4.848451 | 0.075081  | -1.722028 |
| H | -3.989699 | -1.495069 | -0.490993 |
| C | -4.782223 | 1.431261  | -2.060821 |
| C | -2.885804 | 1.695742  | -0.535391 |
| C | -3.805549 | 2.247707  | -1.461669 |
| H | -5.474596 | 1.862869  | -2.782635 |
| C | -3.461672 | 3.654366  | -1.591354 |
| C | -5.886229 | -0.880910 | -2.343184 |
| C | -6.807473 | -0.166833 | -3.349219 |
| H | -6.241859 | 0.261887  | -4.190045 |
| H | -7.384644 | 0.640172  | -2.873483 |
| H | -7.525636 | -0.889457 | -3.764798 |
| C | -6.770670 | -1.485266 | -1.226580 |
| H | -7.311042 | -0.694712 | -0.683819 |
| H | -6.175505 | -2.052595 | -0.496929 |
| H | -7.514384 | -2.171769 | -1.661004 |



C -5.154720 -2.024523 -3.086091  
H -5.886151 -2.720334 -3.525981  
H -4.506752 -2.600088 -2.409657  
H -4.528618 -1.626264 -3.899127  
N -1.973531 2.674976 -0.137944  
C -2.335598 3.867858 -0.757380  
H -1.467988 2.615390 0.756237  
C -4.007082 4.725121 -2.322579  
C -3.428324 5.996575 -2.230749  
H -4.880193 4.553842 -2.951400  
C -2.266824 6.171558 -1.435683  
C -1.684629 5.118760 -0.718519  
H -1.781665 7.143416 -1.384176  
C -3.996010 7.217122 -2.982653  
C -5.258298 6.867616 -3.792679  
H -6.067319 6.493335 -3.147243  
H -5.053652 6.111185 -4.564640  
H -5.627780 7.770830 -4.300350  
C -2.931139 7.766720 -3.961778  
H -2.650843 7.004181 -4.703972  
H -2.018330 8.082473 -3.436357  
H -3.327513 8.640995 -4.501576  
C -4.367358 8.321160 -1.963330  
H -4.768812 9.202196 -2.487863  
H -3.494058 8.645047 -1.379535  
H -5.133970 7.963257 -1.259471  
N -0.451766 5.180205 -0.035844  
C 0.309205 6.276291 0.277252  
H 0.033442 4.284883 0.103444  
O -0.109773 7.441565 0.164716  
N -2.077805 -0.116371 0.851074

C -1.750697 -1.430208 1.134866  
H -1.665380 0.606213 1.477059  
O -1.902999 -2.374504 0.331320  
C -0.705091 -2.772274 2.941051  
C -0.906466 -3.055449 4.300398  
C -0.352679 -4.184360 4.949750  
H -1.513639 -2.350548 4.870957  
C 0.425863 -5.075068 4.199392  
C 0.091603 -3.675182 2.213990  
C 0.643227 -4.826104 2.833943  
H 0.873231 -5.953513 4.662984  
C 1.421010 -5.507671 1.810164  
C -0.627088 -4.389424 6.452925  
C 0.034256 -5.670216 6.995441  
H 1.129151 -5.642751 6.889003  
H -0.340132 -6.571401 6.487162  
H -0.193799 -5.772544 8.066813  
C -2.152461 -4.495525 6.692790  
H -2.577386 -5.349525 6.143832  
H -2.679873 -3.586608 6.369722  
H -2.357792 -4.640890 7.764771  
C -0.070061 -3.184363 7.248045  
H -0.263655 -3.317184 8.323851  
H -0.538390 -2.239942 6.935795  
H 1.017010 -3.088764 7.104597  
N 0.536250 -3.588103 0.891628  
C 1.311961 -4.722349 0.637833  
H -0.117812 -3.185880 0.208232  
C 2.181808 -6.689679 1.797933  
C 2.831344 -7.084658 0.621834  
H 2.256083 -7.288766 2.704970

C 2.738591 -6.261662 -0.528274  
C 2.008874 -5.065152 -0.537030  
H 3.259226 -6.540044 -1.441150  
C 3.664279 -8.379238 0.534534  
C 3.672830 -9.158017 1.863335  
H 2.659738 -9.462140 2.166087  
H 4.115756 -8.569424 2.680748  
H 4.274896 -10.071433 1.747271  
C 5.127622 -8.032000 0.169811  
H 5.578350 -7.381724 0.934941  
H 5.195097 -7.515157 -0.798066  
H 5.729266 -8.951590 0.103870  
C 3.071557 -9.298434 -0.560052  
H 3.663353 -10.223466 -0.639439  
H 3.073811 -8.810755 -1.545454  
H 2.033776 -9.575484 -0.319898  
N 1.973406 -4.141269 -1.602818  
C 2.344875 -4.328136 -2.908214  
H 1.751766 -3.169368 -1.357282  
O 2.677404 -5.438055 -3.359061  
N -1.223992 -1.576407 2.401059  
H -1.355567 -0.778903 3.068550  
C 2.313254 -3.107246 -3.800627  
C 2.524234 -3.356781 -5.150186  
C 2.094065 -1.739442 -3.394368  
C 2.102174 -0.720610 -4.332005  
C 2.532211 -2.339399 -6.132421  
C 2.313027 -0.984467 -5.710560  
H 2.692002 -4.392722 -5.450397  
H 1.947953 0.314195 -4.029739  
C 2.746542 -2.614563 -7.512549

C 2.320991 0.048170 -6.689178  
C 2.747111 -1.590480 -8.440113  
H 2.911559 -3.648161 -7.824840  
C 2.532285 -0.251059 -8.022559  
H 2.155921 1.080525 -6.373141  
H 2.912488 -1.806787 -9.496851  
H 2.534847 0.549701 -8.764443  
O 1.875936 -1.519694 -2.052668  
C 1.638425 -0.173269 -1.556277  
C 2.936183 0.603777 -1.330694  
H 1.099838 -0.341723 -0.615345  
H 0.960221 0.354068 -2.244110  
C 1.719758 5.997462 0.750862  
C 2.476818 7.118848 1.062562  
C 2.358617 4.706127 0.851919  
H 1.991392 8.093332 0.983312  
C 3.834777 7.048589 1.452473  
C 3.691194 4.604828 1.209574  
H 1.260015 1.627732 0.635424  
C 4.460748 5.756831 1.517871  
C 4.596001 8.209081 1.769367  
H 4.112484 9.187162 1.716336  
H 4.175543 3.630443 1.271098  
C 5.830172 5.677461 1.896399  
C 5.923507 8.099474 2.136330  
C 2.678436 2.081108 -0.974799  
C 2.121606 2.276310 0.435244  
O 1.564068 3.609404 0.609654  
C 6.542117 6.823562 2.199157  
H 6.311069 4.698042 1.946355  
H 6.501828 8.992591 2.378390

H 7.591864 6.749505 2.489215  
H 2.872474 2.075742 1.212490  
H 3.615940 2.644257 -1.083879  
H 1.964067 2.512236 -1.694973  
H 3.542162 0.570582 -2.247130  
H 3.525506 0.110168 -0.542356  
H -1.702586 3.102234 5.172551  
C -0.768964 2.869672 4.629989  
O -1.507916 0.623850 4.140662  
C -1.089412 1.711980 3.659725  
O -0.375696 4.036513 3.886026  
O -0.890240 1.948631 2.415139  
H -0.297095 3.691819 2.965127  
C 0.312053 2.473769 5.638953  
H -0.014411 1.607591 6.230342  
H 0.511361 3.310641 6.322741  
H 1.247219 2.215358 5.120345

### 3.3.35 CzU-BB formate complex

152 -1

C 5.557104 4.517081 -0.377149  
C 4.363435 3.850096 -0.692406  
C 3.297580 4.458141 -1.404135  
H 4.281189 2.814488 -0.373181  
C 3.421590 5.789467 -1.808017  
C 5.660712 5.864485 -0.802563  
C 4.599616 6.494946 -1.501050  
H 2.623025 6.290155 -2.354600  
C 5.032708 7.852845 -1.772173  
C 2.036292 3.620509 -1.694159

C 0.978172 4.414200 -2.483034  
H 1.359742 4.745500 -3.460473  
H 0.633733 5.300739 -1.929315  
H 0.102352 3.773992 -2.665385  
C 1.400101 3.165343 -0.358557  
H 1.109568 4.033293 0.252993  
H 2.093879 2.550602 0.232534  
H 0.497352 2.564992 -0.552139  
C 2.420006 2.372383 -2.524255  
H 1.526662 1.761354 -2.728691  
H 3.146360 1.739595 -1.994708  
H 2.862606 2.664584 -3.488778  
N 6.725592 6.760280 -0.673473  
C 6.338973 7.973496 -1.231222  
H 7.464667 6.647116 0.037827  
C 4.419835 8.950399 -2.401482  
C 5.103602 10.166918 -2.498449  
H 3.412934 8.842243 -2.803978  
C 6.417032 10.258983 -1.973851  
C 7.061449 9.180496 -1.353767  
H 6.968308 11.192603 -2.051766  
C 4.488763 11.411475 -3.168765  
C 3.056522 11.153823 -3.672620  
H 2.377408 10.875943 -2.852537  
H 3.025593 10.357079 -4.431285  
H 2.662212 12.070135 -4.136330  
C 5.357718 11.829775 -4.379125  
H 5.404283 11.022950 -5.126834  
H 6.386726 12.071765 -4.077071  
H 4.929660 12.721293 -4.863431  
C 4.440326 12.576734 -2.151776

H 4.010455 13.474396 -2.622684  
H 5.442961 12.837256 -1.783585  
H 3.816890 12.313478 -1.283734  
N 8.398541 9.207162 -0.896916  
C 9.176535 10.299559 -0.611762  
H 8.894238 8.309892 -0.852516  
O 8.737472 11.462569 -0.634373  
N 6.634440 3.945062 0.325283  
C 6.836974 2.602690 0.615064  
H 7.333510 4.611993 0.716472  
O 6.039219 1.694730 0.323924  
C 8.333716 1.117052 1.868480  
C 7.702013 0.714030 3.047313  
C 8.026002 -0.485649 3.728539  
H 6.929565 1.373399 3.447695  
C 9.037069 -1.298645 3.200397  
C 9.327373 0.273180 1.350900  
C 9.689632 -0.930056 2.012281  
H 9.320557 -2.225539 3.698783  
C 10.724807 -1.550417 1.204667  
C 7.265054 -0.842016 5.019716  
C 7.742744 -2.172876 5.628786  
H 8.807551 -2.138726 5.903819  
H 7.590278 -3.016530 4.939230  
H 7.169011 -2.382402 6.543871  
C 5.754202 -0.966743 4.708329  
H 5.569885 -1.763192 3.971405  
H 5.343484 -0.029819 4.305950  
H 5.197156 -1.213105 5.625812  
C 7.476214 0.274196 6.070711  
H 6.929962 0.031993 6.995733

H 7.111960 1.247090 5.710716  
H 8.542698 0.380642 6.320754  
N 10.103597 0.415996 0.206884  
C 10.927271 -0.699799 0.084920  
H 9.871229 1.066252 -0.537322  
C 11.459922 -2.741313 1.335075  
C 12.394568 -3.090077 0.354685  
H 11.288837 -3.382184 2.199254  
C 12.576871 -2.229300 -0.755716  
C 11.861475 -1.034899 -0.918387  
H 13.291195 -2.492045 -1.530730  
C 13.237612 -4.378434 0.435496  
C 12.920671 -5.202257 1.697833  
H 11.868563 -5.523565 1.723992  
H 13.132895 -4.638089 2.618666  
H 13.546023 -6.106846 1.709030  
C 14.740792 -4.011217 0.463492  
H 14.975996 -3.389184 1.340456  
H 15.040852 -3.456691 -0.437213  
H 15.352800 -4.924864 0.516489  
C 12.951788 -5.261656 -0.802826  
H 13.552862 -6.182882 -0.758358  
H 13.200537 -4.741554 -1.738889  
H 11.889585 -5.546754 -0.843612  
N 12.031862 -0.155026 -2.011454  
C 12.491187 -0.464764 -3.267315  
H 11.757870 0.824886 -1.887275  
O 12.862011 -1.608714 -3.580872  
N 8.048605 2.366001 1.238323  
H 8.660167 3.166565 1.526782  
C 12.511713 0.652978 -4.285952



C 12.944391 0.282898 -5.552891  
C 12.103656 2.021922 -4.088509  
C 12.131885 2.921139 -5.141635  
C 12.993933 1.178279 -6.645923  
C 12.569277 2.533443 -6.434911  
H 13.250514 -0.754790 -5.695717  
H 11.821827 3.955238 -4.999142  
C 13.440885 0.779581 -7.937396  
C 12.609580 3.442791 -7.528589  
C 13.468618 1.685357 -8.980291  
H 13.761318 -0.253663 -8.088679  
C 13.049099 3.025204 -8.771376  
H 12.287932 4.475000 -7.373592  
H 13.812266 1.374922 -9.968333  
H 13.075253 3.731665 -9.603096  
O 11.684653 2.366256 -2.822641  
C 11.241454 3.722783 -2.547092  
C 12.405870 4.687159 -2.318587  
H 10.631530 3.609555 -1.641857  
H 10.578341 4.062080 -3.357407  
C 10.617902 10.028370 -0.238811  
C 11.326573 11.126351 0.230229  
C 11.312745 8.767513 -0.328497  
H 10.797164 12.078733 0.293735  
C 12.684413 11.058998 0.621028  
C 12.644691 8.670394 0.036329  
H 10.287202 5.713178 -0.796438  
C 13.360475 9.795650 0.522132  
C 13.394021 12.193840 1.105810  
H 12.871568 13.150387 1.178899  
H 13.174591 7.722026 -0.043933

C 14.727696 9.717982 0.908424  
C 14.720950 12.086628 1.475574  
C 11.933792 6.145225 -2.162527  
C 11.163227 6.370075 -0.863434  
O 10.581233 7.698440 -0.787397  
C 15.389650 10.838929 1.374767  
H 15.247102 8.760089 0.833134  
H 15.260052 12.959949 1.846340  
H 16.438369 10.766515 1.669006  
H 11.788763 6.186159 0.023014  
H 12.810139 6.807371 -2.197384  
H 11.288553 6.423111 -3.011033  
H 13.097430 4.635287 -3.171345  
H 12.973352 4.368291 -1.430297  
O 9.796721 4.377642 2.215710  
C 9.404877 5.562764 2.041342  
O 8.353864 5.927755 1.420498  
H 10.030379 6.380001 2.476141

### 3.3.36 CzU-BB sorbate complex

163 -1

C -3.792083 0.363454 -0.383120  
C -5.000570 -0.253017 -0.741486  
C -6.057292 0.428911 -1.396031  
H -5.109203 -1.305624 -0.492467  
C -5.896711 1.780008 -1.710191  
C -3.656007 1.740046 -0.693091  
C -4.699616 2.431575 -1.360778  
H -6.682560 2.338362 -2.218371  
C -4.241409 3.793886 -1.536379

C -7.339474 -0.354771 -1.739029  
C -8.390775 0.525721 -2.439373  
H -8.017483 0.929429 -3.392369  
H -8.704067 1.369921 -1.806453  
H -9.285009 -0.076474 -2.659083  
C -7.967250 -0.912802 -0.439074  
H -8.234037 -0.096203 0.249012  
H -7.277667 -1.588025 0.087414  
H -8.882793 -1.479095 -0.671324  
C -6.993025 -1.533230 -2.680839  
H -7.902288 -2.104229 -2.926466  
H -6.275338 -2.226176 -2.218506  
H -6.554138 -1.166374 -3.621033  
N -2.578621 2.604422 -0.480155  
C -2.939281 3.857545 -0.968371  
H -1.843346 2.457443 0.265864  
C -4.838409 4.928813 -2.110580  
C -4.142333 6.140461 -2.129509  
H -5.840883 4.850897 -2.530983  
C -2.838690 6.185109 -1.578250  
C -2.208982 5.070234 -1.005434  
H -2.280711 7.117060 -1.591266  
C -4.732578 7.428838 -2.735509  
C -6.156949 7.215293 -3.281005  
H -6.854116 6.895735 -2.491840  
H -6.179432 6.464959 -4.085870  
H -6.534554 8.161034 -3.697064  
C -3.837016 7.910620 -3.902284  
H -3.783759 7.149681 -4.696134  
H -2.811814 8.123219 -3.566880  
H -4.247428 8.834024 -4.339755

C -4.790805 8.531771 -1.651609  
H -5.203953 9.460182 -2.075532  
H -3.792972 8.759563 -1.250167  
H -5.432693 8.222795 -0.812596  
N -0.878623 5.093688 -0.523575  
C -0.120013 6.193776 -0.212255  
H -0.381655 4.198249 -0.473273  
O -0.582365 7.349313 -0.200132  
N -2.718289 -0.303325 0.231379  
C -2.712835 -1.579258 0.778377  
H -1.796749 0.180788 0.260269  
O -3.714320 -2.301887 0.903922  
C -1.121993 -3.098030 1.942964  
C -1.878940 -3.529023 3.037449  
C -1.493717 -4.618802 3.858186  
H -2.797580 -2.985928 3.257323  
C -0.295054 -5.284773 3.576470  
C 0.057181 -3.809765 1.659917  
C 0.485204 -4.885121 2.477519  
H 0.037540 -6.119060 4.193521  
C 1.716335 -5.383713 1.891079  
C -2.399694 -5.013680 5.040422  
C -1.833987 -6.204542 5.835838  
H -0.849123 -5.976071 6.270453  
H -1.735219 -7.104755 5.211041  
H -2.515677 -6.446915 6.664600  
C -3.798468 -5.407585 4.508509  
H -3.730232 -6.270247 3.828460  
H -4.272938 -4.580071 3.961939  
H -4.459890 -5.682331 5.344890  
C -2.543267 -3.813502 6.007156

H -3.190172 -4.085702 6.855618  
H -2.990567 -2.940809 5.510198  
H -1.562804 -3.512308 6.406585  
N 0.976278 -3.618949 0.630575  
C 1.962070 -4.596282 0.734906  
H 0.756447 -3.103196 -0.216712  
C 2.590567 -6.428237 2.236657  
C 3.703049 -6.698681 1.432759  
H 2.386263 -7.022686 3.126726  
C 3.920060 -5.907942 0.277210  
C 3.068875 -4.860586 -0.097463  
H 4.771749 -6.114133 -0.365577  
C 4.701265 -7.828642 1.753083  
C 4.328205 -8.586754 3.040850  
H 3.340093 -9.065027 2.963529  
H 4.323125 -7.924240 3.919448  
H 5.068858 -9.378872 3.224875  
C 6.117549 -7.232409 1.937086  
H 6.134705 -6.512061 2.769278  
H 6.461877 -6.713855 1.030855  
H 6.839561 -8.032540 2.162437  
C 4.724116 -8.842828 0.584710  
H 5.439952 -9.651525 0.798741  
H 5.024559 -8.367922 -0.360256  
H 3.731033 -9.294136 0.437749  
N 3.263521 -4.062669 -1.249818  
C 3.830283 -4.457429 -2.436451  
H 2.901217 -3.103514 -1.243090  
O 4.314277 -5.589917 -2.600597  
N -1.434576 -1.968240 1.153412  
H -0.691934 -1.249357 1.043496

C 3.816835 -3.457316 -3.571269  
C 4.318986 -3.931106 -4.776575  
C 3.308757 -2.107658 -3.536722  
C 3.309977 -1.329881 -4.683386  
C 4.343801 -3.158734 -5.960886  
C 3.817733 -1.823254 -5.913202  
H 4.701042 -4.952985 -4.795250  
H 2.923103 -0.312350 -4.663909  
C 4.860864 -3.662096 -7.188134  
C 3.831494 -1.038231 -7.100133  
C 4.860084 -2.876044 -8.324491  
H 5.257990 -4.679239 -7.215453  
C 4.340809 -1.555613 -8.277043  
H 3.433423 -0.021791 -7.068818  
H 5.257520 -3.266624 -9.262718  
H 4.345522 -0.944228 -9.181314  
O 2.825602 -1.659022 -2.329718  
C 2.305861 -0.303515 -2.207601  
C 3.417904 0.738070 -2.075351  
H 1.689390 -0.347300 -1.300627  
H 1.641911 -0.090481 -3.059209  
C 1.327248 5.956032 0.153929  
C 1.965038 7.018923 0.779482  
C 2.092960 4.763257 -0.101914  
H 1.381665 7.922598 0.964334  
C 3.320596 6.974123 1.181784  
C 3.426859 4.694317 0.266198  
H 1.160339 1.740203 -0.745968  
C 4.070147 5.777383 0.918285  
C 3.958432 8.067760 1.832647  
H 3.379911 8.972990 2.030823

H 4.012967 3.800248 0.057373  
C 5.437128 5.725769 1.310920  
C 5.286653 7.986300 2.204933  
C 2.868079 2.177133 -2.028080  
C 2.026638 2.411082 -0.776808  
O 1.433133 3.738389 -0.729690  
C 6.028886 6.805840 1.939628  
H 6.012651 4.819341 1.110591  
H 5.770149 8.828146 2.703406  
H 7.077961 6.752939 2.236989  
H 2.609241 2.241481 0.141730  
H 3.712971 2.880282 -2.061196  
H 2.251539 2.373799 -2.919691  
H 4.110646 0.654042 -2.924556  
H 4.001805 0.525191 -1.165870  
C 2.051405 2.024800 4.826488  
C 2.186058 2.968207 5.786954  
C 3.137410 2.898754 6.936404  
C 1.116436 2.130902 3.729291  
C 0.955987 1.203896 2.754582  
C -0.027233 1.343032 1.644654  
O -0.058058 0.396269 0.772602  
H 3.735332 1.976988 6.919524  
H 2.597980 2.948363 7.897240  
H 3.824341 3.761829 6.930080  
H 2.677580 1.125109 4.868874  
H 1.552469 3.861723 5.729327  
H 0.491809 3.030509 3.684762  
H 1.560329 0.292419 2.748519  
O -0.781245 2.368145 1.593899

## 4. References

- 1 G. Sanchez, A. Espinosa, D. Curiel, A. Tarraga and P. Molina, *J. Org. Chem.*, 2013, **78**, 9725–9737.
- 2 A. Rützel, V. Yrjänä, S. A. Kadam, I. Saar, M. Ilisson, A. Darnell, K. Haav, T. Haljasorg, L. Toom, J. Bobacka and I. Leito, *Beilstein J. Org. Chem.*, 2020, **16**, 1901–1914.
- 3 K. M. Bık and M. J. Chmielewski, *Chem. Commun.*, 2014, **50**, 1305–1308.
- 4 S. A. Kadam, K. Haav, L. Toom, T. Haljasorg and I. Leito, *J. Org. Chem.*, 2014, **79**, 2501–2513.
- 5 K. Haav, S. A. Kadam, L. Toom, P. A. Gale, N. Busschaert, M. Wenzel, J. R. Hiscock, I. L. Kirby, T. Haljasorg, M. Lökov and I. Leito, *J. Org. Chem.*, 2013, **78**, 7796–7808.
- 6 A. Klamt, F. Eckert and W. Arlt, *Annu. Rev. Chem. Biomol. Eng.*, 2010, **1**, 101–122.
- 7 A. Klamt, *J. Phys. Chem.*, 1995, **99**, 2224–2235.
- 8 A. Klamt, V. Jonas, T. Bürger and J. C. W. Lohrenz, *J. Phys. Chem. A*, 1998, **102**, 5074–5085.
- 9 F. Eckert and A. Klamt, *AIChE J.*, 2002, **48**, 369–385.
